# Supplementary material for: Hydrogen-Fueled Microbial Pathways in Biogas Upgrading Systems Revealed by Genome-Centric Metagenomics
Source: Front Microbiol. 2018 May 28;9:1079. doi: 10.3389/fmicb.2018.01079 (PMC5985405; doi:10.3389/fmicb.2018.01079)
Supplement: Supplementary file 2 [file Data_Sheet_2.XLSX]

## Sheet: common_community
PG name	PG ID	Genome size [bp]	Predicted genes	Total essential genes	Univocal essential genes	Completeness	Duplication	Strain heterogeneity	Phylophlan Domain	Phylophlan Phylum	Phylophlan Class	Phylophlan Order	Phylophlan Family	Phylophlan Genus	Phylophlan Species	ANI - match with NCBI genome	ANI - value [%]	Common essential genes [%]	16S rRNA gene BLAST best match	16S rRNA gene BLAST identity [%]	16S rRNA gene BLAST coverage [%]	16S rRNA gene scaffold	16S rRNA gene size [bp]	Cov meso pre H2	Cov meso post H2	Cov thermo pre H2	Cov thermo post H2
Rikenellaceae sp. DTU001	DTU001	2002609	1676	105	103	0.980952	0.0194175	33.33	Bacteria	Bacteroidetes	Bacteroidia	Bacteroidales	Rikenellaceae	Alistipes										0.324953	0.078646	158.25	19.5273
Rikenellaceae sp. DTU002	DTU002	1894927	1802	93	93	0.885714	0	33.33	Bacteria	Bacteroidetes	Bacteroidia	Bacteroidales							Draconibacterium orientale/Paludibacter propionicigenes	85	99	2236	1525	83.9558	70.796	1.97264	0.44789
Porphyromonadaceae sp. DTU003	DTU003	1948582	1840	65	57	0.542857	0.140351	91.67	Bacteria	Bacteroidetes	Bacteroidia	Bacteroidales												1.82668	0.497258	0.634778	0.288585
Methanoculleus sp. DTU006	DTU006	1787371	1930	30	29	0.852941	0.0344828	50	Archaea	Euryarchaeota	Methanomicrobia	Methanomicrobiales	Methanomicrobiaceae	Methanoculleus		Methanoculleus bourgensis str. MS2T (ref: GCA_000304355)	88.7384	83.0052	Methanoculleus marisnigri	97	99	16581	1466	0.177928	0.342142	40.3921	50.7905
Methanoculleus sp. DTU007	DTU007	1356509	1923	12	10	0.294118	0.2	20	Archaea	Euryarchaeota	Methanomicrobia	Methanomicrobiales	Methanomicrobiaceae	Methanoculleus	Methanoculleus thermophilus	Methanoculleus thermophilus str. CR-1 (ref: GCA_001571405)	98.9686	91.4717						0.0854345	0.256932	1.83523	0.0197525
Euryarchaeota sp. DTU008	DTU008	1702376	1794	33	32	0.941176	0.03125	0	Archaea	Euryarchaeota	Thermoplasmata	Thermoplasmatales												0.00351196	0.00133235	1.47916	0.229462
Clostridiales sp. DTU010	DTU010	1956627	1978	101	98	0.933333	0.0306122	0	Bacteria	Firmicutes	Clostridia	Clostridiales	Syntrophomonadaceae											6.84964	3.11163	286.234	461.769
Clostridia sp. DTU011	DTU011	1752552	1631	101	99	0.942857	0.020202	100	Bacteria	Firmicutes	Clostridia	Thermoanaerobacterales	Thermoanaerobacteraceae						Thermanaeromonas toyohensis	86	96	4973	1544	0.86285	1.28656	68.0609	95.9755
Clostridiales sp. DTU012	DTU012	2082894	2000	100	98	0.933333	0.0204082	0	Bacteria	Firmicutes	Clostridia	Clostridiales	Syntrophomonadaceae											0.00984002	0.0186333	24.9337	34.0702
Clostridiales sp. DTU013	DTU013	2236638	2060	98	95	0.904762	0.0315789	20	Bacteria	Firmicutes	Clostridia	Clostridiales	Clostridiaceae											0.0340962	0.0312627	16.4084	30.6766
Clostridia sp. DTU014	DTU014	2296341	2136	102	100	0.952381	0.02	0	Bacteria	Firmicutes	Clostridia	Clostridiales							Desulfotomaculum nigrificans/Desulfotomaculum carboxydivorans	85	99	14444	1549	0.0134564	0.0141349	17.2855	31.2066
Syntrophomonas sp. DTU017	DTU017	1735300	1875	52	52	0.495238	0	25	Bacteria	Firmicutes	Clostridia	Clostridiales	Syntrophomonadaceae											0.347762	0.435113	0.00958866	0.009846
Syntrophomonas sp. DTU018	DTU018	1595159	2093	68	59	0.561905	0.152542	29.41	Bacteria	Firmicutes	Clostridia	Clostridiales	Syntrophomonadaceae											0.00815162	0.00392678	0.677566	0.0183219
Syntrophomonas sp. DTU019	DTU019	2098807	2029	87	84	0.8	0.0357143	0	Bacteria	Firmicutes	Clostridia	Clostridiales	Syntrophomonadaceae	Syntrophomonas										0.0143211	0.0116455	1.4263	0.548044
Clostridiales sp. DTU020	DTU020	1391614	1441	104	87	0.828571	0.195402	100	Bacteria	Firmicutes	Clostridia	Clostridiales												0.671463	0.843306	0.971985	0.861311
Clostridia sp. DTU021	DTU021	2058527	2012	101	95	0.904762	0.0631579	11.11	Bacteria	Firmicutes	Clostridia	Clostridiales	Syntrophomonadaceae											0.141755	0.068271	9.46582	8.96898
Clostridia sp. DTU022	DTU022	1469460	1706	64	61	0.580952	0.0491803	0	Bacteria	Firmicutes	Clostridia	Clostridiales	Eubacteriaceae											0.134732	0.244423	0.190598	0.29639
Clostridiales sp. DTU023	DTU023	1356602	1214	104	102	0.971429	0.0196078	100	Bacteria	Firmicutes	Clostridia	Clostridiales												0.495168	0.373638	0.785816	1.02004
Clostridiales sp. DTU024	DTU024	2060225	2018	101	98	0.933333	0.0306122	0	Bacteria	Firmicutes	Clostridia	Clostridiales												3.62954	2.87693	1.44035	0.751235
Clostridia sp. DTU025	DTU025	2129892	1928	102	99	0.942857	0.030303	0	Bacteria	Firmicutes	Clostridia	Clostridiales	Syntrophomonadaceae											0.00315718	0.00549276	1.52683	4.79397
Peptococcaceae sp. DTU027	DTU027	2075676	2046	100	98	0.933333	0.0204082	0	Bacteria	Firmicutes	Clostridia	Clostridiales	Syntrophomonadaceae											0.0917118	0.0329158	4.11562	4.85076
Halothermothrix sp. DTU029	DTU029	1821579	1795	101	97	0.92381	0.0412371	0	Bacteria	Firmicutes	Clostridia	Halanaerobiales	Halanaerobiaceae	Halothermothrix										0.00923982	0.0116582	5.58213	13.0878
Clostridia sp. DTU030	DTU030	1908251	1924	108	102	0.971429	0.0588235	0	Bacteria	Firmicutes	Clostridia	Clostridiales	Syntrophomonadaceae											0.0332617	0.0168388	8.61208	9.32072
Clostridiales sp. DTU032	DTU032	1755837	1635	86	80	0.761905	0.075	41.67	Bacteria	Firmicutes	Clostridia	Clostridiales												0.410295	1.16751	1.31129	1.51917
Clostridiales sp. DTU033	DTU033	1425946	1364	104	102	0.971429	0.0196078	0	Bacteria	Firmicutes	Clostridia	Clostridiales												0.0198121	0.148133	4.32021	0.240415
Gammaproteobacteria sp. DTU037	DTU037	2874101	2685	104	103	0.980952	0.00970874	20	Bacteria	Proteobacteria	Gammaproteobacteria	Pseudomonadales	Pseudomonadaceae			Pseudomonas caeni str. DSM 24390 (ref: GCA_000421765)	82.5409	67.635						1.17504	0.500937	1.35942	0.235522
Gammaproteobacteria sp. DTU040	DTU040	1960997	1983	93	93	0.885714	0	14.29	Bacteria	Proteobacteria	Gammaproteobacteria													0.248274	0.071681	0.504085	0.365856
Alcaligenaceae sp. DTU041	DTU041	2849297	2701	104	103	0.971698	0.00970874	0	Bacteria	Proteobacteria	Betaproteobacteria	Burkholderiales	Alcaligenaceae											5.12466	0.15052	0.113492	0.0349214
Spirochaeta sp. DTU042	DTU042	2122417	2178	65	63	0.605769	0.031746	50	Bacteria	Spirochaetes	Spirochaetales													0.26652	0.554884	0.169301	0.126631
Anaerobaculum sp. DTU043	DTU043	2110256	2247	128	97	0.92381	0.319588	97.14	Bacteria	Synergistetes	Synergistia	Synergistales	Synergistaceae	Anaerobaculum										0.0290297	0.0107126	5.8711	2.762
Synergistaceae sp. DTU044	DTU044	1286972	1350	70	69	0.657143	0.0144928	0	Bacteria	Synergistetes	Synergistia	Synergistales	Synergistaceae											0.1841	0.0433999	0.609716	0.202733
Synergistaceae sp. DTU045	DTU045	1505831	1479	88	84	0.8	0.047619	0	Bacteria	Synergistetes	Synergistia	Synergistales	Synergistaceae											1.16232	0.184301	0.851818	0.318372
Porphyromonadaceae sp. DTU047	DTU047	2059566	2069	87	73	0.695238	0.191781	93.33	Bacteria	Bacteroidetes	Bacteroidia	Bacteroidales												0.424044	0.0496806	3.33973	1.39905
Porphyromonadaceae sp. DTU048	DTU048	1649216	1700	59	54	0.514286	0.0925926	62.5	Bacteria	Bacteroidetes	Bacteroidia	Bacteroidales												0.608781	0.120674	0.276198	0.124594
Methanothermobacter sp. DTU051	DTU051	597381	944	17	16	0.470588	0.0625	0	Archaea	Euryarchaeota	Methanobacteria	Methanobacteriales	Methanobacteriaceae	Methanothermobacter		Methanothermobacter thermautotrophicus str. Delta H (ref: GCA_000008645)	82.4844	67.3729						0.000648679	0.000218677	0.0900704	0.37619
Syntrophothermus sp. DTU052	DTU052	2103574	2079	107	103	0.980952	0.038835	25	Bacteria	Firmicutes	Clostridia	Clostridiales	Syntrophomonadaceae											0.128681	0.0886975	1.59157	3.92274
Clostridiales sp. DTU053	DTU053	1986761	2050	56	51	0.485714	0.0980392	17.24	Bacteria	Firmicutes	Clostridia	Clostridiales	Syntrophomonadaceae											1.80658	1.28892	0.0172459	0.0125859
Clostridiaceae sp. DTU054	DTU054	3875385	3635	136	92	0.87619	0.478261	4.29	Bacteria	Firmicutes	Clostridia	Clostridiales	Clostridiaceae											1.39825	0.212602	0.00505936	0.00205742
Clostridiales sp. DTU055	DTU055	2320421	2235	99	96	0.914286	0.03125	50	Bacteria	Firmicutes	Clostridia	Clostridiales	Syntrophomonadaceae											0.00273864	0.00912037	2.08055	3.49949
Clostridiaceae sp. DTU059	DTU059	2018681	1884	104	101	0.961905	0.029703	100	Bacteria	Firmicutes	Clostridia	Clostridiales	Clostridiaceae											0.0723398	0.0583931	1.37981	0.493492
Clostridiales sp. DTU060	DTU060	2095853	1936	104	101	0.961905	0.029703	0	Bacteria	Firmicutes	Clostridia	Clostridiales	Clostridiaceae											0.00221868	0.00233312	2.04182	0.948797
Acholeplasmatales sp. DTU061	DTU061	1418208	1337	99	98	0.942308	0.0102041	0	Bacteria	Tenericutes	Mollicutes	Acholeplasmatales	Acholeplasmataceae											0.00335767	0.000837866	4.71033	2.48199
Clostridia sp. DTU062	DTU062	1684647	1715	86	84	0.8	0.0238095	0	Bacteria	Firmicutes	Clostridia	Clostridiales	Syntrophomonadaceae											0.00508609	0.0112188	0.526802	2.07948
Tepidanaerobacter sp. DTU063	DTU063	2084781	2076	103	102	0.971429	0.00980392	0	Bacteria	Firmicutes	Clostridia	Thermoanaerobacterales	Thermoanaerobacteriaceae	Tepidanaerobacter										0.0143457	0.00288542	8.33931	1.65881
Clostridia sp. DTU065	DTU065	2123463	2009	104	102	0.971429	0.0196078	0	Bacteria	Firmicutes	Clostridia	Clostridiales	Syntrophomonadaceae											0.334982	0.892367	3.7654	3.73974
Clostridiales sp. DTU066	DTU066	1864292	1951	91	88	0.838095	0.0340909	25	Bacteria	Firmicutes	Clostridia	Clostridiales												0.0363166	0.0610205	1.56692	0.764617
Acholeplasmatales sp. DTU067	DTU067	1353428	1319	108	104	1	0.0384615	0	Bacteria	Tenericutes	Mollicutes	Acholeplasmatales	Acholeplasmataceae											0.000521885	0.000731075	1.23442	0.438648
Clostridia sp. DTU068	DTU068	1263231	1515	46	46	0.438095	0	50	Bacteria	Firmicutes	Clostridia	Clostridiales	Syntrophomonadaceae											0.00118174	0.000277788	0.369124	1.07833
Clostridiales sp. DTU069	DTU069	2419410	2144	107	104	0.990476	0.0288462	0	Bacteria	Firmicutes	Clostridia	Clostridiales	Clostridiaceae											0.0207137	0.0323088	3.81543	1.44
Clostridiales sp. DTU070	DTU070	2596794	2575	96	90	0.857143	0.0666667	0	Bacteria	Firmicutes	Clostridia	Clostridiales	Clostridiaceae											0.00391518	0.00268371	0.755842	0.371662
Clostridiales sp. DTU071	DTU071	1694741	1870	79	78	0.742857	0.0128205	42.86	Bacteria	Firmicutes	Clostridia	Clostridiales												0.695265	0.262219	0.450735	0.35407
Clostridiales sp. DTU074	DTU074	2421276	2130	100	94	0.895238	0.0638298	0	Bacteria	Firmicutes	Clostridia	Clostridiales												0.00533878	0.0019208	1.97752	0.917508
Clostridiales sp. DTU075	DTU075	2140806	1971	106	102	0.971429	0.0392157	0	Bacteria	Firmicutes	Clostridia	Clostridiales												0.424625	0.382653	1.87175	1.49242
Clostridia sp. DTU077	DTU077	1818120	1720	101	99	0.942857	0.020202	0	Bacteria	Firmicutes	Clostridia	Clostridiales	Syntrophomonadaceae											0.00638245	0.00539366	0.449579	7.38989
Clostridiales sp. DTU078	DTU078	2119119	1854	103	101	0.961905	0.019802	0	Bacteria	Firmicutes	Clostridia	Clostridiales							Sedimentibacter saalensis	91	58	44517	611	0.0213826	0.0260243	1.07595	0.995417
Clostridiaceae sp. DTU079	DTU079	2852580	2842	85	74	0.704762	0.148649	21.05	Bacteria	Firmicutes	Clostridia	Clostridiales	Clostridiaceae			Clostridium straminisolvens str. JCM 21531 (ref: GCA_000521465)	80.4604	44.5813						0.0195417	0.0156591	0.746083	0.25978
Clostridia sp. DTU080	DTU080	2866522	2514	106	105	1	0.00952381	100	Bacteria	Firmicutes	Clostridia	Clostridiales	Syntrophomonadaceae											0.000586301	0.000406167	2.62883	1.33504
Clostridiales sp. DTU081	DTU081	789279	906	66	58	0.552381	0.137931	77.78	Bacteria	Firmicutes	Clostridia	Clostridiales												3.40094	9.56167	4.30001	2.91822
Clostridiales sp. DTU082	DTU082	2311332	2369	103	98	0.933333	0.0510204	26.67	Bacteria	Firmicutes	Clostridia	Clostridiales	Clostridiaceae	Clostridium										0.622892	0.0239885	0.249504	0.150895
Clostridiales sp. DTU083	DTU083	1474661	1405	78	75	0.714286	0.04	0	Bacteria	Firmicutes	Clostridia	Clostridiales												0.00215187	0.000742577	1.00387	0.997251
Clostridia sp. DTU084	DTU084	1989950	1963	101	99	0.942857	0.020202	0	Bacteria	Firmicutes	Clostridia	Clostridiales	Syntrophomonadaceae											0.00407267	0.0047667	1.73186	2.02672
Clostridiales sp. DTU087	DTU087	1907377	1798	93	91	0.866667	0.021978	0	Bacteria	Firmicutes	Clostridia	Clostridiales	Syntrophomonadaceae											0.000803069	0.000397745	1.63307	1.18622
Clostridiales sp. DTU089	DTU089	997367	1291	37	37	0.352381	0	0	Bacteria	Firmicutes	Clostridia	Clostridiales												0.049302	0.0237462	0.549135	0.0251104
Clostridiales sp. DTU090	DTU090	1378499	1273	78	75	0.714286	0.04	0	Bacteria	Firmicutes	Clostridia	Clostridiales												1.26119	1.54118	2.00267	1.66481
Erysipelothrix sp. DTU091	DTU091	948786	1188	58	54	0.514286	0.0740741	0	Bacteria	Firmicutes	Erysipelotrichi	Erysipelotrichales	Erysipelotrichaceae	Erysipelothrix	Erysipelothrix rhusiopathiae									0.499905	0.0324944	0.144201	0.0472695
Clostridiales sp. DTU092	DTU092	2159526	2064	80	77	0.733333	0.038961	20	Bacteria	Firmicutes	Clostridia	Clostridiales												0.0143339	0.0125527	0.723266	0.619232
Clostridiales sp. DTU093	DTU093	1885944	1911	99	97	0.92381	0.0206186	16.67	Bacteria	Firmicutes	Clostridia	Clostridiales	Syntrophomonadaceae											0.00592836	0.00728427	1.23499	1.80746
Acholeplasmatales sp. DTU094	DTU094	674416	747	84	83	0.798077	0.0120482	0	Bacteria	Tenericutes	Mollicutes	Acholeplasmatales	Acholeplasmataceae											0.839908	0.0810906	0.974756	0.140565
Clostridia sp. DTU095	DTU095	2085055	2178	90	86	0.819048	0.0465116	60	Bacteria	Firmicutes	Clostridia	Clostridiales	Syntrophomonadaceae											0.00840831	0.00460807	3.02759	2.22417
Eubacteriaceae sp. DTU096	DTU096	1503295	1481	98	95	0.904762	0.0315789	0	Bacteria	Firmicutes	Clostridia	Clostridiales	Eubacteriaceae											0.0818594	0.0282733	0.640809	0.641656
Clostridia sp. DTU097	DTU097	1741323	1777	95	94	0.895238	0.0106383	100	Bacteria	Firmicutes	Clostridia	Clostridiales	Syntrophomonadaceae											0.000727698	0.000341154	0.822903	0.303935
Pelotomaculum sp. DTU098	DTU098	2438424	2233	104	101	0.961905	0.029703	0	Bacteria	Firmicutes	Clostridia	Clostridiales	Peptococcaceae	Pelotomaculum										0.00608263	0.00452007	3.18426	0.383916
Clostridiales sp. DTU099	DTU099	1823440	1710	92	91	0.866667	0.010989	0	Bacteria	Firmicutes	Clostridia	Clostridiales												2.57947	1.51928	1.89485	0.822941
Clostridiales sp. DTU100	DTU100	1430437	1490	72	71	0.67619	0.0140845	57.14	Bacteria	Firmicutes	Clostridia	Clostridiales	Eubacteriaceae											0.600696	0.0502885	0.219133	0.0621399
Clostridiales sp. DTU101	DTU101	2709841	2372	99	97	0.92381	0.0206186	33.33	Bacteria	Firmicutes	Clostridia	Clostridiales												0.881143	0.944011	0.766559	0.323685
Campylobacterales sp. DTU103	DTU103	1509844	1619	100	99	0.942857	0.010101	50	Bacteria	Proteobacteria	Epsilonproteobacteria	Campylobacterales	Campylobacteraceae	Campylobacter										0.558954	1.39187	1.57511	0.235502
Thermotogaceae sp. DTU111	DTU111	1795609	1765	98	96	0.923077	0.0208333	50	Bacteria	Thermotogae	Thermotogae	Petrotogales	Petrotogaceae	Defluviitoga	Defluviitoga tunisiensis	Defluviitoga tunisiensis str. (ref: GCA_000953715)	98.3665	91.6147	Defluviitoga tunisiensis	98	94	61303	600	0.0265267	0.0153464	12.5213	4.59935
Clostridiales sp. DTU113	DTU113	980793	1045	67	57	0.542857	0.175439	94.12	Bacteria	Firmicutes	Clostridia	Clostridiales	Clostridiales_Family_XI__Incertae_Sedis											1.82627	0.167845	0.00336265	0.00189242
Firmicutes sp. DTU114	DTU114	2890628	2771	54	50	0.47619	0.08	20	Bacteria	Firmicutes	Clostridia	Clostridiales	Syntrophomonadaceae											0.00650364	0.00370115	0.513461	0.458159
Firmicutes sp. DTU115	DTU115	2382702	2226	103	98	0.933333	0.0510204	40	Bacteria	Firmicutes	Clostridia	Clostridiales												1.28965	0.602444	0.192926	0.0362437
Firmicutes sp. DTU116	DTU116	1927701	1919	88	86	0.819048	0.0232558	28.57	Bacteria	Firmicutes	Clostridia	Clostridiales												0.90758	1.12613	0.370276	0.181811
Clostridiales sp. DTU117	DTU117	821930	965	31	30	0.285714	0.0333333	0	Bacteria	Firmicutes	Clostridia	Clostridiales												0.124285	0.393213	0.212599	0.151486
Firmicutes sp. DTU118	DTU118	844773	862	42	41	0.390476	0.0243902	50	Bacteria	Firmicutes	Clostridia	Clostridiales												0.304352	0.170535	0.256225	0.169047
Synergistetes sp. DTU119	DTU119	2040888	2113	97	94	0.895238	0.0319149	66.67	Bacteria	Synergistetes	Synergistia	Synergistales	Synergistaceae											3.69175	3.33336	0.933634	0.861037
Synergistaceae sp. DTU120	DTU120	1823405	1782	107	104	0.990476	0.0288462	0	Bacteria	Synergistetes	Synergistia	Synergistales	Synergistaceae	Aminobacterium	Aminobacterium colombiense	Aminobacterium colombiense str. DSM 12261 (ref: GCA_000025885)	99.4648	98.6532						0.707136	0.30627	0.813341	0.709988
Treponema sp. DTU121	DTU121	1808937	2103	79	76	0.730769	0.0394737	60	Bacteria	Spirochaetes	Spirochaetes	Spirochaetales	Treponemaceae	Treponema										0.0580704	0.0602684	0.225849	0.514906
Clostridia sp. DTU122	DTU122	1888209	1928	102	99	0.942857	0.030303	80	Bacteria	Firmicutes	Clostridia	Clostridiales	Syntrophomonadaceae											0.00186577	0.000849509	0.492959	2.19164
Proteobacteria sp. DTU123	DTU123	2096257	2262	56	55	0.52381	0.0181818	50	Bacteria	Proteobacteria	Deltaproteobacteria	Desulfobacterales	Desulfobulbaceae			Desulfobulbus elongatus str. DSM 2908 (ref: GCA_000621145)	81.1352	59.107						0.95454	0.220327	0.103753	0.00510854
Firmicutes sp. DTU124	DTU124	1021602	1134	38	33	0.314286	0.151515	12.5	Bacteria	Firmicutes	Clostridia	Clostridiales	Syntrophomonadaceae											4.40856	5.82315	0.0492414	0.0506156
Syntrophomonadaceae sp. DTU125	DTU125	2219662	2248	119	79	0.752381	0.506329	50	Bacteria	Firmicutes	Clostridia	Clostridiales	Syntrophomonadaceae											0.00169113	0.00166285	0.585489	0.576489
Clostridiales sp. DTU126	DTU126	1415739	1257	72	68	0.647619	0.0588235	100	Bacteria	Firmicutes	Clostridia	Clostridiales												0.352254	0.742394	0.677014	0.290192
Bacteroidales sp. DTU127	DTU127	1481636	1261	46	45	0.428571	0.0222222	50	Bacteria	Bacteroidetes	Bacteroidia	Bacteroidales												3.13889	0.966761	0.113845	0.0367877
Clostridiales sp. DTU128	DTU128	1853886	1622	102	100	0.952381	0.02	0	Bacteria	Firmicutes	Clostridia	Clostridiales												0.00120478	0.000582346	3.96454	1.6591
Corynebacterium sp. DTU130	DTU130	2713589	2690	95	91	0.866667	0.043956	55.56	Bacteria	Actinobacteria	Actinobacteria	Actinomycetales	Corynebacteriaceae	Corynebacterium	Corynebacterium humireducens	Corynebacterium humireducens str. DSM 45392 (ref: GCA_000819445)	97.2567	89.2937						0.134722	0.0552938	3.82127	0.151175
Actinomycetales sp. DTU131	DTU131	1834609	1906	55	54	0.514286	0.0185185	25	Bacteria	Actinobacteria	Actinobacteria	Actinomycetales	Microbacteriaceae											0.242718	0.113169	0.864086	0.0615926
Propionibacteriaceae sp. DTU132	DTU132	3048519	2922	98	97	0.92381	0.0103093	0	Bacteria	Actinobacteria	Actinobacteria	Actinomycetales	Propionibacteriaceae											1.00238	0.184452	0.278418	0.615794
Microbacteriaceae sp. DTU133	DTU133	1760691	1799	75	74	0.704762	0.0135135	25	Bacteria	Actinobacteria	Actinobacteria	Actinomycetales	Microbacteriaceae	Leucobacter		Leucobacter chironomi str. DSM 19883 (ref: GCA_000421845)	80.2561	40.2446						0.480924	0.623981	0.200093	0.233014
Bacteroidetes sp. DTU134	DTU134	1802401	1650	102	101	0.961905	0.00990099	54.55	Bacteria	Bacteroidetes	Bacteroidia	Bacteroidales	Rikenellaceae						Alistipes shahii	86	99	6876	1524	38.7974	156.589	1.02702	0.458761
Bacteroidetes sp. DTU135	DTU135	3311494	2757	122	103	0.980952	0.184466	0	Bacteria	Bacteroidetes	Bacteroidia	Bacteroidales							Owenweeksia hongkongensis	86	99	1053	1528	27.0449	19.3037	1.80284	0.192227
Bacteroidales sp. DTU136	DTU136	2275435	2013	102	98	0.933333	0.0408163	21.43	Bacteria	Bacteroidetes	Bacteroidia	Bacteroidales	Bacteroidaceae						Bacteroides clarus	87	97	6089	1519	13.4115	29.9319	0.715328	0.20186
Bacteroidetes sp. DTU137	DTU137	2247848	2151	108	76	0.72381	0.421053	1.2	Bacteria	Bacteroidetes	Bacteroidia	Bacteroidales	Porphyromonadaceae						Tannerella forsythia	83	99	5959	1319	3.75689	20.0749	0.0255375	0.0293928
Bacteroidetes sp. DTU138	DTU138	2164472	2065	88	84	0.8	0.047619	40	Bacteria	Bacteroidetes	Bacteroidia	Bacteroidales												0.390164	0.438289	0.101621	0.0264612
Bacteroidetes sp. DTU139	DTU139	1970252	2077	71	67	0.638095	0.0597015	33.33	Bacteria	Bacteroidetes	Bacteroidia	Bacteroidales												0.154725	0.336626	0.213301	0.0963692
Bacteroidales sp. DTU140	DTU140	3086183	2827	66	54	0.514286	0.222222	0	Bacteria	Bacteroidetes	Bacteroidia	Bacteroidales												1.65056	3.36662	0.0591955	0.0902781
Bacteroidales sp. DTU141	DTU141	2186713	2269	53	50	0.47619	0.06	50	Bacteria	Bacteroidetes	Bacteroidia	Bacteroidales	Porphyromonadaceae	Dysgonomonas		Proteiniphilum acetatigenes str. DSM 18083 (ref: GCA_000380985)	82.9433	62.9352						0.121042	0.723717	0.029493	0.0904311
Bacteroidetes sp. DTU142	DTU142	2719008	2460	89	87	0.828571	0.0229885	0	Bacteria	Bacteroidetes	Bacteroidia	Bacteroidales												1.89953	1.22904	0.0195881	0.0110886
Bacteroidetes sp. DTU143	DTU143	1142327	1293	40	39	0.371429	0.025641	11.11	Bacteria	Bacteroidetes	Bacteroidia	Bacteroidales												0.195687	0.194972	0.24622	0.108068
Bacteroidetes sp. DTU144	DTU144	3604182	3711	107	86	0.819048	0.244186	2.38	Bacteria	Bacteroidetes	Bacteroidia	Bacteroidales												4.92441	2.16447	0.0537673	0.026843
Bacteroidales sp. DTU145	DTU145	1387610	1313	87	74	0.704762	0.175676	85.71	Bacteria	Bacteroidetes	Bacteroidia	Bacteroidales												0.378691	1.27195	0.0865609	0.215844
Bacteroidetes sp. DTU146	DTU146	3356890	3311	105	92	0.87619	0.141304	9.62	Bacteria	Bacteroidetes	Bacteroidia	Bacteroidales												0.436725	3.56866	0.0126978	0.00949162
Bacteroidetes sp. DTU147	DTU147	3005584	2574	76	74	0.704762	0.027027	40	Bacteria	Bacteroidetes	Bacteroidia	Bacteroidales												1.24534	0.157399	0.0180876	0.00945632
Firmicutes sp. DTU148	DTU148	2669178	3118	40	35	0.333333	0.142857	75	Bacteria	Firmicutes	Clostridia	Clostridiales	Syntrophomonadaceae											1.26615	7.68897	0.041424	0.0395708
Bacteroidetes sp. DTU149	DTU149	2534141	2202	105	97	0.92381	0.0824742	8	Bacteria	Bacteroidetes	Bacteroidia	Bacteroidales	Porphyromonadaceae	Fermentimonas	Fermentimonas caenicola	Fermentimonas caenicola str. (ref: GCA_000953535)	99.5667	87.0118						1.26941	1.82085	0.346315	0.19598
Bacteroidetes sp. DTU150	DTU150	2779073	2411	102	98	0.933333	0.0408163	18.18	Bacteria	Bacteroidetes	Bacteroidia	Bacteroidales												1.28373	0.648819	0.11686	0.0536401
Bacteroidales sp. DTU151	DTU151	2027841	1806	70	67	0.638095	0.0447761	0	Bacteria	Bacteroidetes	Bacteroidia	Bacteroidales												1.26408	0.634101	0.0248459	0.00607128
Bacteroidetes sp. DTU152	DTU152	2220285	2012	81	80	0.761905	0.0125	10	Bacteria	Bacteroidetes	Bacteroidia	Bacteroidales												0.574333	1.07094	0.0975162	0.0159252
Flavobacteriaceae sp. DTU153	DTU153	2368833	2303	101	97	0.92381	0.0412371	8.33	Bacteria	Bacteroidetes	Flavobacteria	Flavobacteriales	Flavobacteriaceae											0.0488179	0.0222736	1.27464	0.0391136
Bacteroidetes sp. DTU154	DTU154	1252963	1199	89	82	0.780952	0.0853659	0	Bacteria	Bacteroidetes	Bacteroidia	Bacteroidales												0.230635	0.984171	0.0428561	0.00442253
Bacteroidetes sp. DTU155	DTU155	989951	939	38	38	0.361905	0	0	Bacteria	Bacteroidetes	Bacteroidia	Bacteroidales												0.142535	0.612581	0.103366	0.0521831
Flavobacteriaceae sp. DTU156	DTU156	3501283	3375	133	95	0.904762	0.4	2.04	Bacteria	Bacteroidetes	Flavobacteria	Flavobacteriales	Flavobacteriaceae											1.69548	0.551696	0.030791	0.00727256
Bacteroidetes sp. DTU157	DTU157	2833646	2622	118	81	0.771429	0.45679	2.13	Bacteria	Bacteroidetes	Bacteroidia	Bacteroidales												0.391074	1.05569	0.00436885	0.00242017
Chloroflexi sp. DTU158	DTU158	1747261	1797	92	88	0.854369	0.0454545	0	Bacteria	Chloroflexi														4.22561	0.633151	0.416776	0.213049
Chloroflexi sp. DTU159	DTU159	1597387	1677	84	72	0.699029	0.166667	6.67	Bacteria	Chloroflexi														10.5738	3.85885	0.226394	0.0610106
Chloroflexi sp. DTU160	DTU160	866165	1040	34	33	0.320388	0.030303	50	Bacteria	Verrucomicrobia														2.13388	3.88256	0.66795	0.431027
Chloroflexi sp. DTU161	DTU161	1711942	1919	52	46	0.446602	0.130435	42.86	Bacteria	Chloroflexi														1.57274	1.22033	0.286664	0.0512844
Chloroflexi sp. DTU162	DTU162	2100872	2211	84	78	0.757282	0.0769231	15.38	Bacteria	Chloroflexi														0.642767	0.995119	0.0417089	0.853927
Chloroflexi sp. DTU163	DTU163	2495456	2194	101	71	0.68932	0.422535	0	Bacteria	Chloroflexi														0.0513309	1.90335	0.0111031	0.0167185
Lentisphaerae sp. DTU164	DTU164	3568717	2800	88	86	0.819048	0.0232558	25	Bacteria	Lentisphaerae	Lentisphaerae													1.95192	4.98404	0.485223	2.27881
Verrucomicrobia sp. DTU165	DTU165	932957	1125	28	28	0.269231	0	0	Bacteria	Verrucomicrobia														0.0924764	0.325152	0.144656	0.114293
Verrucomicrobia sp. DTU166	DTU166	2355779	1904	105	100	0.961538	0.05	0	Bacteria	Verrucomicrobia	Verrucomicrobiae	Verrucomicrobiales							Methylacidimicrobium tartarophylax	80	99	5057	1577	1.09805	3.68665	0.0105234	0.00864071
Verrucomicrobia sp. DTU167	DTU167	1582641	1405	65	65	0.625	0	0	Bacteria	Verrucomicrobia	Verrucomicrobiae	Verrucomicrobiales												0.319664	0.448425	0.188411	0.150542
Proteobacteria sp. DTU168	DTU168	540706	716	40	39	0.371429	0.025641	0	Bacteria	Proteobacteria														0.00632542	0.603081	0.00541404	0.00611767
Proteobacteria sp. DTU169	DTU169	810934	877	70	67	0.638095	0.0447761	0	Bacteria	Proteobacteria														0.898554	0.0411441	0.01413	0.00143732
Acidobacteria sp. DTU170	DTU170	3012440	2715	110	94	0.886792	0.170213	0	Bacteria	Acidobacteria	Acidobacteriia	Acidobacteriales							Acidobacterium capsulatum/Deferrisoma camini	82	99	3353	676	7.83396	14.2714	0.0212764	0.0389511
Fibrobacteres sp. DTU171	DTU171	2323898	2124	132	91	0.91	0.450549	0	Bacteria	Fibrobacteres	Fibrobacteres	Fibrobacterales	Fibrobacteraceae	Fibrobacter	Fibrobacter succinogenes									0.0854374	2.53046	0.0139637	0.0422891
Synergistetes sp. DTU172	DTU172	1081203	1118	66	62	0.590476	0.0645161	50	Bacteria	Synergistetes	Synergistia	Synergistales	Synergistaceae											0.211014	0.118204	0.371613	0.306444
Synergistetes sp. DTU173	DTU173	1703924	1750	60	59	0.561905	0.0169492	100	Bacteria	Synergistetes	Synergistia	Synergistales	Synergistaceae											0.630054	0.17733	0.286475	0.0420019
Proteobacteria sp. DTU174	DTU174	907250	920	96	95	0.904762	0.0105263	0	Bacteria	Proteobacteria														0.00147568	0.0183182	0.0567339	2.35524
Clostridiales sp. DTU175	DTU175	2234537	2236	121	102	0.971429	0.186275	0	Bacteria	Firmicutes	Clostridia	Thermoanaerobacterales	Thermoanaerobacteraceae						Moorella thermoacetica/Moorella thermoautotrophica	87	98	3564	1565	34.2903	98.4319	0.0629004	0.343847
Firmicutes sp. DTU176	DTU176	1689642	1564	95	95	0.904762	0	0	Bacteria	Firmicutes	Clostridia	Clostridiales	Syntrophomonadaceae											0.00302455	0.00336497	9.50412	14.7021
Clostridiales sp. DTU177	DTU177	1526148	1713	73	69	0.657143	0.057971	12.5	Bacteria	Firmicutes	Clostridia	Clostridiales												0.0222103	0.0755013	0.458331	0.385358
Clostridiales sp. DTU178	DTU178	1658429	1836	43	41	0.390476	0.0487805	50	Bacteria	Firmicutes	Clostridia	Clostridiales												0.590251	0.101613	0.10457	0.139917
Clostridiales sp. DTU179	DTU179	1699425	1609	99	98	0.933333	0.0102041	0	Bacteria	Firmicutes	Clostridia	Clostridiales												0.337923	2.19907	0.264814	1.6243
Firmicutes sp. DTU180	DTU180	1107824	1219	70	70	0.666667	0	0	Bacteria	Firmicutes	Erysipelotrichi	Erysipelotrichales	Erysipelotrichaceae	Erysipelothrix	Erysipelothrix rhusiopathiae									0.550895	0.196753	0.511942	0.378832
Firmicutes sp. DTU181	DTU181	618423	697	37	37	0.352381	0	0	Bacteria	Firmicutes	Clostridia	Clostridiales												0.0071115	0.0280135	0.751113	0.0431042
Firmicutes sp. DTU182	DTU182	889632	1027	56	55	0.52381	0.0181818	0	Bacteria	Firmicutes	Clostridia	Clostridiales	Clostridiaceae	Clostridium										0.14387	0.0419196	0.384208	0.126545
Clostridia sp. DTU183	DTU183	1722624	1603	102	100	0.952381	0.02	0	Bacteria	Firmicutes	Clostridia	Clostridiales	Syntrophomonadaceae											0.00574175	0.0039658	19.4086	26.0609
Firmicutes sp. DTU184	DTU184	2498371	2659	31	31	0.295238	0	0	Bacteria	Firmicutes	Clostridia	Clostridiales	Syntrophomonadaceae											0.0240341	0.036484	0.317487	0.299151
Clostridiales sp. DTU185	DTU185	1030654	1150	40	36	0.342857	0.111111	0	Bacteria	Firmicutes	Clostridia	Clostridiales												0.197268	0.174194	0.152961	0.365524
Tenericutes sp. DTU186	DTU186	793597	866	90	83	0.798077	0.0843373	0	Bacteria															0.357235	0.0727177	1.57911	0.0656364
Erysipelotrichaceae sp. DTU187	DTU187	798423	895	55	54	0.514286	0.0185185	0	Bacteria	Firmicutes	Erysipelotrichi	Erysipelotrichales	Erysipelotrichaceae	Erysipelothrix	Erysipelothrix rhusiopathiae									0.234431	0.0784138	0.431139	0.200935
Clostridiales sp. DTU188	DTU188	3078576	2983	134	102	0.971429	0.313725	0	Bacteria	Firmicutes	Clostridia	Clostridiales	Eubacteriaceae											3.95595	3.30227	0.0495139	0.0229455
Firmicutes sp. DTU189	DTU189	1385060	1477	78	74	0.704762	0.0540541	0	Bacteria	Firmicutes	Negativicutes	Selenomonadales	Acidaminococcaceae											0.0486952	0.0879572	0.426187	0.457994
Syntrophomonadaceae sp. DTU190	DTU190	2315868	2358	107	102	0.971429	0.0490196	50	Bacteria	Firmicutes	Clostridia	Clostridiales	Syntrophomonadaceae											0.106348	0.0596917	0.464331	2.25536
Clostridia sp. DTU191	DTU191	950206	1111	45	37	0.352381	0.216216	0	Bacteria	Firmicutes	Clostridia	Clostridiales	Eubacteriaceae											0.0314945	0.0311176	0.221529	0.355542
Clostridiales sp. DTU192	DTU192	1928073	1984	81	77	0.733333	0.0519481	33.33	Bacteria	Firmicutes	Clostridia	Clostridiales	Syntrophomonadaceae											0.00566835	0.00791641	0.584849	0.97192
Firmicutes sp. DTU193	DTU193	1937007	1730	105	104	0.990476	0.00961538	0	Bacteria	Firmicutes	Clostridia	Clostridiales												1.53107	1.12518	0.171208	0.160264
Firmicutes sp. DTU194	DTU194	1390686	1609	37	37	0.352381	0	0	Bacteria	Firmicutes	Clostridia	Clostridiales												0.0709053	0.0725258	0.542378	0.10653
Firmicutes sp. DTU195	DTU195	2353101	2276	108	95	0.904762	0.136842	7.69	Bacteria	Firmicutes	Clostridia	Clostridiales												0.988241	0.149156	0.222454	0.0699249
Clostridia sp. DTU196	DTU196	2816061	2546	110	103	0.980952	0.0679612	0	Bacteria	Firmicutes	Clostridia	Clostridiales	Clostridiaceae											0.0798588	0.0431479	5.58939	4.89454
Clostridia sp. DTU197	DTU197	534051	565	35	35	0.333333	0	100	Bacteria	Firmicutes	Clostridia	Clostridiales	Syntrophomonadaceae											0.00457845	0.00315127	1.09599	0.585028
Clostridiales sp. DTU198	DTU198	1356100	1280	51	49	0.466667	0.0408163	0	Bacteria	Firmicutes	Clostridia	Clostridiales												1.36602	0.605433	0.0478153	0.0371718
Clostridiales sp. DTU199	DTU199	1906119	1743	83	82	0.780952	0.0121951	0	Bacteria	Firmicutes	Clostridia	Clostridiales	Clostridiaceae											0.830183	1.28411	0.0649715	0.0101205
Clostridiales sp. DTU200	DTU200	2305570	2233	72	63	0.6	0.142857	33.33	Bacteria	Firmicutes	Clostridia	Clostridiales	Clostridiaceae											3.57104	0.137166	0.0435467	0.0145198
Firmicutes sp. DTU201	DTU201	2071441	1994	42	38	0.361905	0.105263	2.04	Bacteria	Firmicutes	Clostridia	Clostridiales	Syntrophomonadaceae											3.99766	1.63677	0.0258523	0.0118283
Clostridiales sp. DTU202	DTU202	931381	891	71	70	0.666667	0.0142857	0	Bacteria	Firmicutes	Clostridia	Clostridiales	Eubacteriaceae											0.102726	0.0214684	1.24768	0.667837
Clostridiales sp. DTU203	DTU203	1436875	1496	36	35	0.333333	0.0285714	0	Bacteria	Firmicutes	Clostridia	Clostridiales	Clostridiaceae											0.725797	0.0503417	0.0280983	0.0124811
Clostridia sp. DTU204	DTU204	1572167	1516	95	93	0.885714	0.0215054	100	Bacteria	Firmicutes	Clostridia	Clostridiales	Syntrophomonadaceae											2.42045	0.307179	0.140085	0.102904
Firmicutes sp. DTU205	DTU205	832046	779	64	60	0.571429	0.0666667	0	Bacteria	Firmicutes	Erysipelotrichi	Erysipelotrichales	Erysipelotrichaceae											1.07096	0.279096	0.0846587	0.00695415
Firmicutes sp. DTU206	DTU206	1626415	1512	110	92	0.87619	0.195652	10	Bacteria	Firmicutes	Clostridia	Clostridiales												3.12951	0.0639879	0.178093	0.0887433
Clostridiales sp. DTU207	DTU207	2071408	2125	55	44	0.419048	0.25	11.11	Bacteria	Firmicutes	Clostridia	Clostridiales	Clostridiaceae											2.0275	1.73758	0.0141096	0.0129491
Firmicutes sp. DTU208	DTU208	2015150	1949	91	87	0.828571	0.045977	0	Bacteria	Firmicutes	Clostridia	Clostridiales												1.22344	0.932319	0.156199	0.0479244
Firmicutes sp. DTU209	DTU209	590858	629	78	77	0.733333	0.012987	0	Bacteria	Firmicutes														0.0346101	0.199517	0.899092	0.26053
Clostridia sp. DTU210	DTU210	1069449	1123	46	46	0.438095	0	0	Bacteria	Firmicutes	Clostridia	Halanaerobiales	Halanaerobiaceae											0.000364409	0.000478319	0.938861	0.0487506
Clostridiales sp. DTU211	DTU211	2331412	2083	85	84	0.8	0.0119048	0	Bacteria	Firmicutes	Clostridia	Clostridiales	Clostridiaceae											0.926496	1.24468	2.57327	2.11908
Firmicutes sp. DTU212	DTU212	1327974	1783	52	41	0.390476	0.268293	4.76	Bacteria	Firmicutes	Clostridia	Clostridiales	Syntrophomonadaceae											0.0171173	0.0225182	0.0469397	0.539241
Firmicutes sp. DTU213	DTU213	1591072	1633	98	95	0.904762	0.0315789	22.22	Bacteria	Firmicutes	Clostridia	Clostridiales	Eubacteriaceae											0.865274	0.202331	0.070172	0.190307
Firmicutes sp. DTU214	DTU214	1746039	1674	78	76	0.72381	0.0263158	25	Bacteria	Firmicutes	Clostridia	Clostridiales												0.524314	0.101251	0.198228	0.209147
Firmicutes sp. DTU215	DTU215	3345710	2960	86	81	0.771429	0.0617284	0	Bacteria	Firmicutes	Clostridia	Clostridiales	Clostridiaceae											0.469502	2.08466	0.00392714	0.00990605
Clostridiales sp. DTU216	DTU216	2275128	2157	102	81	0.771429	0.259259	4.17	Bacteria	Firmicutes	Clostridia	Clostridiales												0.28087	1.66716	0.0201454	0.0158917
Clostridiales sp. DTU217	DTU217	2773856	2787	127	95	0.904762	0.336842	0	Bacteria	Firmicutes	Clostridia	Clostridiales	Clostridiaceae	Alkaliphilus										1.77579	0.0724152	0.0106299	0.00482389
Syntrophomonadaceae sp. DTU218	DTU218	1670728	1902	77	72	0.685714	0.0694444	5	Bacteria	Firmicutes	Clostridia	Clostridiales	Syntrophomonadaceae											0.0288176	1.05212	0.00446175	0.141712
Firmicutes sp. DTU219	DTU219	1180634	1111	85	68	0.647619	0.25	0	Bacteria	Firmicutes	Clostridia	Clostridiales												0.603839	0.0485837	0.154987	0.035213
Syntrophomonadaceae sp. DTU220	DTU220	1003532	956	71	69	0.657143	0.0289855	0	Bacteria	Firmicutes	Clostridia	Clostridiales	Syntrophomonadaceae											3.87732	32.6022	1.56208	2.13287
Firmicutes sp. DTU221	DTU221	2733503	2534	99	96	0.914286	0.03125	0	Bacteria	Firmicutes	Clostridia	Clostridiales	Syntrophomonadaceae											0.000390283	0.000553863	0.402892	1.64667
Firmicutes sp. DTU222	DTU222	1021281	1455	50	48	0.457143	0.0416667	66.67	Bacteria	Firmicutes	Clostridia	Clostridiales	Syntrophomonadaceae											0.000472645	0.000536672	0.12855	0.394269
Firmicutes sp. DTU223	DTU223	1800752	1785	102	98	0.933333	0.0408163	0	Bacteria	Firmicutes	Clostridia	Clostridiales	Syntrophomonadaceae											1.258	1.11834	1.51683	0.764317
Firmicutes sp. DTU224	DTU224	639130	653	57	55	0.52381	0.0363636	100	Bacteria	Firmicutes	Erysipelotrichi	Erysipelotrichales	Erysipelotrichaceae											22.125	4.20732	0.0290779	0.0154795
Clostridiales sp. DTU225	DTU225	1696511	1608	95	92	0.87619	0.0326087	50	Bacteria	Firmicutes	Clostridia	Clostridiales												1.71998	8.79691	0.069262	2.04639
Firmicutes sp. DTU226	DTU226	1854783	1697	101	100	0.952381	0.01	0	Bacteria	Firmicutes	Clostridia	Clostridiales												3.44321	4.72877	0.186551	1.81094
Erysipelothrix sp. DTU227	DTU227	473597	691	37	36	0.342857	0.0277778	0	Bacteria	Firmicutes	Erysipelotrichi	Erysipelotrichales	Erysipelotrichaceae	Erysipelothrix	Erysipelothrix rhusiopathiae									0.0577889	0.0145638	0.32397	0.154349
Clostridiales sp. DTU228	DTU228	1959785	1900	99	92	0.87619	0.076087	10	Bacteria	Firmicutes	Clostridia	Clostridiales												2.44788	1.98929	1.60913	0.905241
Clostridiales sp. DTU229	DTU229	1216043	1241	59	55	0.52381	0.0727273	81.82	Bacteria	Firmicutes	Clostridia	Clostridiales	Eubacteriaceae											0.228489	0.360791	0.74161	0.831315
Clostridiales sp. DTU230	DTU230	1850544	1744	90	88	0.838095	0.0227273	20	Bacteria	Firmicutes	Clostridia	Clostridiales												9.48663	11.6276	0.0675257	0.493134
Clostridiales sp. DTU231	DTU231	1590822	1767	75	70	0.666667	0.0714286	0	Bacteria	Firmicutes	Clostridia	Clostridiales												0.498429	0.24321	0.352617	0.228268
Syntrophomonadaceae sp. DTU232	DTU232	2091282	1892	108	104	0.990476	0.0384615	0	Bacteria	Firmicutes	Clostridia	Clostridiales	Syntrophomonadaceae											9.30176	0.371388	0.0083446	0.00467885
Clostridiales sp. DTU233	DTU233	1864218	1963	67	62	0.590476	0.0806452	25	Bacteria	Firmicutes	Clostridia	Clostridiales												0.0695006	0.0388817	0.480355	0.365664
Clostridiales sp. DTU234	DTU234	1508949	1580	76	71	0.67619	0.0704225	25	Bacteria	Firmicutes	Clostridia	Clostridiales												0.00380689	0.00373837	0.384303	0.592055
Clostridiales sp. DTU235	DTU235	1103430	1353	37	36	0.342857	0.0277778	33.33	Bacteria	Firmicutes	Clostridia	Clostridiales												0.0551599	0.00896433	0.356253	0.159616
Clostridia sp. DTU236	DTU236	1941607	1867	91	89	0.847619	0.0224719	0	Bacteria	Firmicutes	Clostridia	Clostridiales	Syntrophomonadaceae											0.0103533	0.0628235	1.17291	1.83305
Tenericutes sp. DTU237	DTU237	684273	763	96	84	0.807692	0.142857	11.76	Bacteria															0.277242	0.109024	1.82998	0.0932964
Firmicutes sp. DTU238	DTU238	676654	856	36	33	0.314286	0.0909091	0	Bacteria	Firmicutes	Erysipelotrichi	Erysipelotrichales	Erysipelotrichaceae	Erysipelothrix	Erysipelothrix rhusiopathiae									0.0717068	0.0177402	0.318096	0.263435
Clostridiales sp. DTU239	DTU239	2266153	2065	98	95	0.904762	0.0315789	0	Bacteria	Firmicutes	Clostridia	Clostridiales												1.21205	0.531972	0.701353	0.805367
Firmicutes sp. DTU240	DTU240	2068601	1845	99	96	0.914286	0.03125	0	Bacteria	Firmicutes	Clostridia	Clostridiales	Clostridiaceae	Clostridium										1.204	0.407056	0.81398	0.405749
Clostridia sp. DTU241	DTU241	2000888	2088	83	69	0.657143	0.202899	20	Bacteria	Firmicutes	Clostridia	Clostridiales	Clostridiaceae											0.0499105	0.115479	0.580427	0.335848
Erysipelotrichaceae sp. DTU242	DTU242	1245591	1264	103	101	0.961905	0.019802	0	Bacteria	Firmicutes	Erysipelotrichi	Erysipelotrichales	Erysipelotrichaceae	Erysipelothrix	Erysipelothrix rhusiopathiae									0.211453	0.101549	1.31936	1.98705
Firmicutes sp. DTU243	DTU243	1780629	2137	52	47	0.447619	0.106383	0	Bacteria	Firmicutes	Clostridia	Clostridiales	Syntrophomonadaceae											0.00321383	0.00145922	0.252482	0.398795
Clostridiales sp. DTU244	DTU244	1690258	1573	103	101	0.961905	0.019802	100	Bacteria	Firmicutes	Clostridia	Clostridiales												0.3425	0.409479	1.72137	1.27614
Firmicutes sp. DTU245	DTU245	4318352	3483	120	103	0.980952	0.165049	0	Bacteria	Firmicutes	Clostridia	Clostridiales	Syntrophomonadaceae											4.64891	8.77123	0.00280034	0.00534041
Firmicutes sp. DTU246	DTU246	2133414	1978	135	94	0.895238	0.43617	2.04	Bacteria	Firmicutes	Clostridia	Clostridiales												14.68	2.98152	0.430265	0.376924
Planctomycetia sp. DTU247	DTU247	5960733	4479	104	99	0.970588	0.0505051	0	Bacteria	Planctomycetes	Planctomycetia	Planctomycetales	Planctomycetaceae						Thermogutta hypogea	90	87	3398	754	7.9824	4.84953	0.00571103	0.00388085
Proteobacteria sp. DTU248	DTU248	1983502	1903	103	100	0.943396	0.03	66.67	Bacteria	Proteobacteria	Betaproteobacteria	Burkholderiales	Alcaligenaceae			Oligella ureolytica str. DSM 18253 (ref: GCA_000373745)	80.9103	71.7814						1.5837	1.00137	0.906053	1.35301
Gammaproteobacteria sp. DTU249	DTU249	2553937	2722	80	77	0.733333	0.038961	50	Bacteria	Proteobacteria	Gammaproteobacteria	Pseudomonadales	Pseudomonadaceae			Pseudomonas bauzanensis str. W13Z2 (ref: GCA_000632535)	83.441	74.5408						0.78224	0.274163	0.445516	0.185889
Gammaproteobacteria sp. DTU250	DTU250	2377932	2512	81	79	0.752381	0.0253165	50	Bacteria	Proteobacteria	Gammaproteobacteria	Pseudomonadales	Pseudomonadaceae			Pseudomonas bauzanensis str. W13Z2 (ref: GCA_000632535)	83.1393	78.4236						0.399199	0.128052	1.56208	0.0468117
Proteobacteria sp. DTU251	DTU251	2421610	2405	128	95	0.896226	0.347368	6.17	Bacteria	Proteobacteria	Betaproteobacteria	Burkholderiales	Alcaligenaceae			Oligella ureolytica str. DSM 18253 (ref: GCA_000373745)	80.4201	39.0021						2.04001	5.21735	0.674086	0.484606
Gammaproteobacteria sp. DTU252	DTU252	1979185	2002	69	65	0.619048	0.0615385	40	Bacteria	Proteobacteria	Gammaproteobacteria													0.204126	0.335264	0.981012	0.125274
Arcobacter sp. DTU253	DTU253	152986	171	38	38	0.361905	0	0	Bacteria	Proteobacteria	Epsilonproteobacteria	Campylobacterales	Campylobacteraceae	Arcobacter	Arcobacter butzleri	Arcobacter skirrowii str. L405 (ref: GCA_001572955)	98.3916	99.4152						0.183634	0.061152	1.09255	0.175202
Burkholderiales sp. DTU254	DTU254	1344018	1867	30	28	0.264151	0.0714286	11.11	Bacteria	Proteobacteria	Betaproteobacteria	Burkholderiales	Comamonadaceae			Xenophilus azovorans str. DSM 13620 (ref: GCA_000745855)	82.6969	51.9014						0.36475	0.314986	0.0305514	0.060226
Xanthomonadaceae sp. DTU255	DTU255	2632268	2582	81	78	0.742857	0.0384615	13.33	Bacteria	Proteobacteria	Gammaproteobacteria	Xanthomonadales	Xanthomonadaceae			Xanthomonas sp. str. NCPPB1131 (ref: GCA_000226895)	81.6876	35.5926						0.122793	1.09708	0.109383	0.647176
Proteobacteria sp. DTU256	DTU256	2474621	2466	63	61	0.580952	0.0327869	27.27	Bacteria	Proteobacteria	Gammaproteobacteria	Xanthomonadales	Xanthomonadaceae			Luteimonas sp. str. J29 (ref: GCA_000472505)	83.2051	65.5718						0.292217	0.826628	0.996616	0.0591948
Proteobacteria sp. DTU257	DTU257	2625531	2255	81	77	0.733333	0.0519481	6.25	Bacteria	Proteobacteria	Deltaproteobacteria													1.18717	2.79715	0.00758799	0.0100155
Gammaproteobacteria sp. DTU258	DTU258	1455221	1813	29	28	0.266667	0.0357143	0	Bacteria	Proteobacteria	Gammaproteobacteria													0.185818	0.00131219	0.439814	0.00147908
Proteobacteria sp. DTU259	DTU259	1421843	1351	47	45	0.424528	0.0444444	0	Bacteria	Proteobacteria	Betaproteobacteria	Burkholderiales	Alcaligenaceae			Oligella ureolytica str. DSM 18253 (ref: GCA_000373745)	82.4952	77.2761						0.0546777	0.0118303	0.87548	0.351319
Gammaproteobacteria sp. DTU260	DTU260	2199301	2154	58	54	0.514286	0.0740741	12.5	Bacteria	Proteobacteria	Gammaproteobacteria	Pseudomonadales	Moraxellaceae			Acinetobacter towneri str. CIP 107472 (ref: GCA_000368785)	88.7131	83.6119						1.30907	0.0528365	0.0118675	0.00240469
Proteobacteria sp. DTU261	DTU261	2515087	2060	98	89	0.847619	0.101124	0	Bacteria	Proteobacteria	Deltaproteobacteria													1.33271	0.343506	0.00232478	0.000592594
Spirochaetes sp. DTU262	DTU262	1843515	1882	92	91	0.875	0.010989	0	Bacteria	Spirochaetes	Spirochaetes	Spirochaetales												6.59162	5.85085	0.389562	0.257288
Spirochaetes sp. DTU263	DTU263	1533931	1504	94	92	0.884615	0.0217391	50	Bacteria	Spirochaetes	Spirochaetes	Spirochaetales												0.866191	2.04413	0.06477	0.0697801
Spirochaetes sp. DTU264	DTU264	2280208	2091	100	97	0.932692	0.0309278	0	Bacteria	Spirochaetes	Spirochaetes	Spirochaetales												1.65084	1.54249	0.189174	0.0892768
Spirochaetales sp. DTU265	DTU265	1873785	1897	47	46	0.442308	0.0217391	0	Bacteria	Spirochaetes	Spirochaetes	Spirochaetales	Spirochaetaceae			Sphaerochaeta globosa str. Buddy (ref: GCA_000190435)	82.1693	79.9157						0.760783	0.185666	0.1699	0.0294143
Spirochaetes sp. DTU266	DTU266	1209167	1516	51	49	0.471154	0.0408163	0	Bacteria	Spirochaetes	Spirochaetes	Spirochaetales	Treponemaceae	Treponema										0.0151295	0.266684	0.158394	0.19722
Proteobacteria sp. DTU267	DTU267	660103	828	44	39	0.371429	0.128205	0	Bacteria	Proteobacteria														0.0194098	0.0147687	0.654008	0.100813
Clostridiales sp. DTU268	DTU268	1648780	1463	104	101	0.961905	0.029703	0	Bacteria	Firmicutes	Clostridia	Clostridiales												0.378436	0.615233	1.41218	1.56279
Clostridia sp. DTU269	DTU269	1445230	1382	99	97	0.92381	0.0206186	0	Bacteria	Firmicutes	Clostridia	Clostridiales	Syntrophomonadaceae			Treponema???								0.248896	0.01561	2.5472	1.02261
Firmicutes sp. DTU270	DTU270	1372449	1435	79	74	0.704762	0.0675676	31.25	Bacteria	Firmicutes	Clostridia	Clostridiales												0.988728	2.54498	0.409567	0.577094
Methanosarcina sp. DTU271	DTU271	2697887	2476	28	27	0.794118	0.037037	0	Archaea	Euryarchaeota	Methanomicrobia	Methanosarcinales	Methanosarcinaceae	Methanosarcina	Methanosarcina mazei	Methanosarcina mazei str. WWM610 (ref: GCA_000970165)	99.1355	94.6284						0.561757	0.068676	0.598243	0.397877
