# Supplementary material for: Hydrogen-Fueled Microbial Pathways in Biogas Upgrading Systems Revealed by Genome-Centric Metagenomics
Source: Front Microbiol. 2018 May 28;9:1079. doi: 10.3389/fmicb.2018.01079 (PMC5985405; doi:10.3389/fmicb.2018.01079)
Supplement: Supplementary file 5 [file Data_Sheet_5.XLSX]

## Sheet: COG
		INFORMATION STORAGE AND PROCESSING	METABOLISM	CELLULAR PROCESSES AND SIGNALING	METABOLISM	METABOLISM	METABOLISM	METABOLISM	METABOLISM	INFORMATION STORAGE AND PROCESSING	INFORMATION STORAGE AND PROCESSING	INFORMATION STORAGE AND PROCESSING	CELLULAR PROCESSES AND SIGNALING	CELLULAR PROCESSES AND SIGNALING	CELLULAR PROCESSES AND SIGNALING	METABOLISM	METABOLISM	POORLY CHARACTERIZED	POORLY CHARACTERIZED	CELLULAR PROCESSES AND SIGNALING	CELLULAR PROCESSES AND SIGNALING	CELLULAR PROCESSES AND SIGNALING			INFORMATION STORAGE AND PROCESSING	METABOLISM	CELLULAR PROCESSES AND SIGNALING	METABOLISM	METABOLISM	METABOLISM	METABOLISM	METABOLISM	INFORMATION STORAGE AND PROCESSING	INFORMATION STORAGE AND PROCESSING	INFORMATION STORAGE AND PROCESSING	CELLULAR PROCESSES AND SIGNALING	CELLULAR PROCESSES AND SIGNALING	CELLULAR PROCESSES AND SIGNALING	METABOLISM	METABOLISM	POORLY CHARACTERIZED	POORLY CHARACTERIZED	CELLULAR PROCESSES AND SIGNALING	CELLULAR PROCESSES AND SIGNALING	CELLULAR PROCESSES AND SIGNALING
	COG category -->	RNA processing and modification	Energy production and conversion	Cell cycle control, cell division, chromosome partitioning	Amino acid transport and metabolism	Nucleotide transport and metabolism	Carbohydrate transport and metabolism	Coenzyme transport and metabolism	Lipid transport and metabolism	Translation, ribosomal structure and biogenesis	Transcription	Replication, recombination and repair	Cell wall/membrane/envelope biogenesis	Cell motility	Post-translational modification, protein turnover, and chaperones	Inorganic ion transport and metabolism	Secondary metabolites biosynthesis, transport, and catabolism	General function prediction only	Function unknown	Signal transduction mechanisms	Intracellular trafficking, secretion, and vesicular transport	Defense mechanisms			RNA processing and modification	Energy production and conversion	Cell cycle control, cell division, chromosome partitioning	Amino acid transport and metabolism	Nucleotide transport and metabolism	Carbohydrate transport and metabolism	Coenzyme transport and metabolism	Lipid transport and metabolism	Translation, ribosomal structure and biogenesis	Transcription	Replication, recombination and repair	Cell wall/membrane/envelope biogenesis	Cell motility	Post-translational modification, protein turnover, and chaperones	Inorganic ion transport and metabolism	Secondary metabolites biosynthesis, transport, and catabolism	General function prediction only	Function unknown	Signal transduction mechanisms	Intracellular trafficking, secretion, and vesicular transport	Defense mechanisms
PG name	PG ID	A	C	D	E	F	G	H	I	J	K	L	M	N	O	P	Q	R	S	T	U	V	na		A	C	D	E	F	G	H	I	J	K	L	M	N	O	P	Q	R	S	T	U	V	na
Corynebacterium sp. DTU130	DTU130	1	138	22	173	78	122	100	80	160	155	124	101	3	78	116	47	237	171	60	26	32	918		0.08	0.694	0.946	0.856	0.049	1	0.068	0.009	0.988	0.003	0.778	1	1	0.712	0.007	0	0.991	0.641	0.999	1	0.994	0
Actinomycetales sp. DTU131	DTU131	1	93	18	180	59	71	52	101	121	119	91	66	0	58	85	49	183	88	66	19	12	480		0.052	0.628	0.699	0	0.012	1	0.812	0	0.657	0	0.331	0.994	1	0.342	0.002	0	0.477	0.998	0.096	0.998	1	0.981
Propionibacteriaceae sp. DTU132	DTU132	1	182	24	225	69	148	123	97	154	175	129	106	2	90	149	56	325	180	106	31	36	752		0.087	0.002	0.944	0.012	0.472	0.977	0.003	0	1	0	0.798	0.999	1	0.337	0	0	0.008	0.607	0.034	0.998	0.993	0.999
Microbacteriaceae sp. DTU133	DTU133	1	109	21	182	47	85	55	78	121	107	92	55	1	50	97	33	171	102	58	17	17	414		0.052	0.033	0.308	0	0.185	0.984	0.534	0	0.414	0.001	0.174	1	1	0.638	0	0	0.592	0.816	0.327	0.998	0.999	1
Acidobacteria sp. DTU170	DTU170	0	200	24	164	54	87	147	63	173	107	136	171	29	86	103	38	238	154	81	71	39	774		1	0	0.883	0.948	0.932	1	0	0.448	0.856	0.943	0.292	0	0.8	0.268	0.115	0.027	0.992	0.959	0.689	0.001	0.909	0.504
Rikenellaceae sp. DTU001	DTU001	0	87	22	79	46	49	69	35	136	36	122	146	6	58	26	14	152	67	32	27	13	538		1	0.487	0.202	1	0.178	1	0.011	0.698	0.02	1	0	0	1	0.124	1	0.774	0.868	1	1	0.756	1	0
Rikenellaceae sp. DTU002	DTU002	0	78	15	98	61	100	53	47	126	65	67	111	1	63	63	22	145	64	47	29	35	524		1	0.914	0.827	0.964	0.001	0.585	0.614	0.089	0.212	0.951	0.975	0	1	0.049	0.243	0.136	0.985	1	0.84	0.628	0.17	0.012
Porphyromonadaceae sp. DTU003	DTU003	0	90	13	92	48	79	59	52	99	52	87	104	1	51	68	12	165	86	18	20	19	608		1	0.556	0.935	0.992	0.139	0.997	0.314	0.032	0.973	1	0.313	0.008	1	0.561	0.108	0.924	0.732	0.997	1	0.984	0.987	0
Bacteroidetes sp. DTU157	DTU157	0	148	19	139	63	171	86	39	178	95	113	144	14	77	78	20	253	145	87	43	45	763		1	0.077	0.975	1	0.377	0.044	0.305	0.998	0.346	0.978	0.805	0.021	1	0.467	0.814	0.902	0.488	0.926	0.204	0.677	0.465	0.043
Porphyromonadaceae sp. DTU047	DTU047	0	105	10	124	63	156	84	41	137	59	104	129	4	58	80	12	170	99	34	33	22	616		1	0.535	0.997	0.899	0.017	0.003	0.01	0.778	0.505	1	0.237	0	1	0.632	0.067	0.983	0.994	0.998	1	0.727	0.996	0.02
Porphyromonadaceae sp. DTU048	DTU048	0	82	14	93	44	95	60	58	94	48	73	93	1	33	77	18	145	72	27	30	28	565		1	0.662	0.836	0.97	0.207	0.639	0.134	0.001	0.975	1	0.76	0.041	1	0.995	0.005	0.36	0.947	0.999	1	0.469	0.556	0
Bacteroidales sp. DTU127	DTU127	0	75	12	91	31	91	57	30	68	51	40	81	2	34	56	20	117	62	31	15	19	352		1	0.104	0.69	0.22	0.439	0.019	0.002	0.356	0.975	0.769	0.998	0	1	0.732	0.011	0.018	0.738	0.984	0.921	0.961	0.749	0.497
Bacteroidetes sp. DTU134	DTU134	0	80	15	97	57	62	57	44	131	63	83	104	2	57	46	19	152	68	33	27	28	488		1	0.719	0.77	0.893	0.005	1	0.222	0.1	0.026	0.898	0.278	0.003	1	0.103	0.89	0.244	0.757	1	0.998	0.644	0.506	0.059
Bacteroidetes sp. DTU135	DTU135	0	135	26	154	61	111	91	68	167	95	109	178	7	108	97	30	253	139	80	36	40	865		1	0.642	0.714	0.987	0.655	1	0.276	0.178	0.893	0.998	0.97	0	1	0.001	0.201	0.251	0.809	0.998	0.681	0.962	0.825	0
Bacteroidales sp. DTU136	DTU136	0	93	20	102	53	108	59	58	133	58	107	129	2	53	66	19	144	69	33	34	32	694		1	0.849	0.638	0.998	0.174	0.819	0.676	0.017	0.506	1	0.066	0	1	0.796	0.489	0.561	1	1	1	0.567	0.681	0
Bacteroidetes sp. DTU137	DTU137	0	81	29	74	41	116	67	32	129	81	118	127	15	62	49	19	159	91	68	41	42	751		1	0.997	0.09	1	0.904	0.749	0.436	0.99	0.862	0.911	0.025	0.001	0.987	0.464	0.996	0.66	1	1	0.31	0.229	0.144	0
Bacteroidetes sp. DTU138	DTU138	0	104	17	129	59	96	97	65	142	84	77	150	16	57	76	26	155	78	107	36	52	569		1	0.587	0.882	0.762	0.061	0.992	0	0.001	0.396	0.831	0.991	0	0.985	0.714	0.153	0.117	1	1	0	0.552	0.002	0.608
Bacteroidetes sp. DTU139	DTU139	0	93	16	124	56	104	84	69	118	77	75	150	16	54	76	31	159	77	99	29	38	645		1	0.93	0.929	0.887	0.139	0.947	0.006	0	0.972	0.954	0.989	0	0.981	0.825	0.156	0.008	1	1	0	0.905	0.312	0
Bacteroidales sp. DTU140	DTU140	0	108	29	147	78	151	96	65	121	102	136	120	14	89	92	21	258	141	74	36	35	1042		1	1	0.6	1	0.076	0.911	0.198	0.384	1	0.994	0.406	0.888	1	0.264	0.553	0.922	0.886	0.997	0.937	0.982	0.981	0
Bacteroidales sp. DTU141	DTU141	0	101	15	121	43	102	82	50	102	80	86	129	7	58	81	17	195	80	47	29	51	845		1	0.921	0.968	0.988	0.924	0.997	0.062	0.464	1	0.975	0.979	0.007	1	0.825	0.185	0.869	0.949	1	0.996	0.959	0.013	0
Bacteroidetes sp. DTU142	DTU142	0	120	22	141	59	139	84	59	129	93	90	154	6	80	78	26	230	103	50	35	28	828		1	0.681	0.81	0.961	0.398	0.65	0.181	0.248	0.999	0.949	0.995	0	1	0.147	0.629	0.344	0.715	1	0.996	0.916	0.993	0
Bacteroidetes sp. DTU143	DTU143	0	54	19	78	44	42	58	34	90	39	50	97	4	32	30	6	117	54	18	23	16	433		1	0.953	0.081	0.825	0.005	1	0.006	0.167	0.346	0.997	0.951	0	1	0.828	0.985	0.992	0.799	1	1	0.475	0.945	0
Bacteroidetes sp. DTU144	DTU144	0	173	33	210	79	204	110	65	188	153	172	152	9	100	82	33	275	156	89	44	60	1302		1	0.726	0.779	0.952	0.643	0.55	0.478	0.946	0.999	0.609	0.306	0.856	1	0.627	1	0.593	1	1	0.968	0.993	0.506	0
Bacteroidales sp. DTU145	DTU145	0	66	13	75	37	78	46	33	113	53	48	70	2	42	33	11	120	51	30	23	14	392		1	0.518	0.568	0.898	0.124	0.423	0.185	0.238	0.001	0.737	0.962	0.099	1	0.251	0.945	0.731	0.711	1	0.942	0.491	0.974	0.021
Bacteroidetes sp. DTU146	DTU146	0	114	18	144	63	166	114	57	181	96	154	177	19	86	81	25	258	134	65	53	47	1321		1	1	0.999	1	0.941	0.979	0.096	0.976	0.996	1	0.437	0.014	1	0.831	0.997	0.899	1	1	1	0.707	0.881	0
Bacteroidetes sp. DTU147	DTU147	0	125	19	174	51	168	83	66	123	88	83	168	8	65	109	35	270	132	76	34	30	819		1	0.797	0.973	0.422	0.91	0.083	0.419	0.12	1	0.999	1	0	1	0.918	0.002	0.028	0.126	0.996	0.665	0.972	0.99	0
Bacteroidetes sp. DTU149	DTU149	0	140	20	162	60	136	89	61	146	94	89	143	5	74	102	18	220	117	51	34	24	565		1	0.006	0.823	0.105	0.111	0.299	0.014	0.053	0.617	0.694	0.95	0	1	0.15	0	0.822	0.409	0.978	0.989	0.825	0.993	0.995
Bacteroidetes sp. DTU150	DTU150	0	136	18	159	61	121	88	60	132	99	92	148	5	76	56	20	251	127	75	36	60	681		1	0.118	0.941	0.454	0.27	0.969	0.036	0.151	0.992	0.799	0.982	0	1	0.229	0.996	0.797	0.088	0.979	0.431	0.843	0.002	0.218
Bacteroidales sp. DTU151	DTU151	0	67	15	82	38	37	67	53	94	54	85	118	8	58	48	21	154	79	34	20	34	755		1	0.999	0.888	1	0.826	1	0.125	0.049	0.999	1	0.564	0	1	0.316	0.97	0.268	0.985	1	1	0.994	0.308	0
Bacteroidetes sp. DTU152	DTU152	0	99	14	119	49	137	79	45	123	77	74	108	6	55	45	17	165	84	48	34	29	677		1	0.676	0.967	0.915	0.368	0.037	0.015	0.466	0.846	0.924	0.985	0.057	1	0.696	0.998	0.752	0.994	1	0.968	0.597	0.81	0
Flavobacteriaceae sp. DTU153	DTU153	0	90	15	106	51	51	75	57	138	67	112	155	11	77	91	26	179	120	47	28	26	878		1	0.999	0.989	1	0.686	1	0.376	0.222	0.941	1	0.364	0	1	0.148	0.041	0.239	0.998	0.99	1	0.987	0.994	0
Bacteroidetes sp. DTU154	DTU154	0	68	15	70	40	51	38	27	120	40	53	78	1	42	34	5	106	45	24	27	27	334		1	0.223	0.292	0.887	0.021	0.996	0.5	0.49	0	0.988	0.696	0.003	1	0.142	0.841	0.993	0.885	1	0.995	0.109	0.086	0.57
Bacteroidetes sp. DTU155	DTU155	0	35	8	47	16	52	24	19	57	31	48	56	1	28	46	14	97	31	15	15	10	328		1	0.985	0.777	0.983	0.918	0.68	0.83	0.662	0.771	0.969	0.271	0.04	1	0.47	0.006	0.079	0.204	0.999	0.998	0.66	0.955	0
Flavobacteriaceae sp. DTU156	DTU156	0	155	30	174	71	107	103	106	201	134	152	181	13	101	105	37	311	180	86	39	63	1198		1	0.956	0.882	1	0.838	1	0.647	0	0.97	0.951	0.768	0.028	1	0.477	0.769	0.245	0.886	0.992	0.968	0.998	0.238	0
Chloroflexi sp. DTU158	DTU158	0	89	19	85	43	119	49	28	128	71	74	71	0	61	73	15	186	108	37	13	29	477		1	0.448	0.449	0.999	0.316	0.018	0.722	0.948	0.067	0.717	0.751	0.843	1	0.06	0.011	0.7	0.045	0.39	0.996	1	0.512	0.403
Chloroflexi sp. DTU159	DTU159	0	95	13	84	48	122	48	45	126	85	86	67	0	52	60	17	175	96	40	14	20	438		1	0.153	0.887	0.995	0.067	0.008	0.692	0.1	0.072	0.102	0.193	0.888	1	0.323	0.254	0.47	0.134	0.778	0.956	0.999	0.961	0.892
Chloroflexi sp. DTU160	DTU160	0	41	10	62	22	77	34	14	54	30	45	56	0	35	41	6	91	47	12	13	18	292		1	0.915	0.544	0.582	0.553	0.002	0.226	0.955	0.915	0.981	0.499	0.048	1	0.097	0.043	0.901	0.614	0.952	1	0.849	0.377	0.026
Chloroflexi sp. DTU161	DTU161	0	76	22	76	38	110	31	39	100	97	101	106	0	68	55	14	173	95	40	8	34	630		1	0.98	0.289	1	0.796	0.378	1	0.565	0.983	0.028	0.046	0.012	1	0.02	0.736	0.854	0.589	0.975	0.984	1	0.307	0
Chloroflexi sp. DTU162	DTU162	0	79	27	74	58	113	49	47	139	91	126	111	3	63	69	13	204	104	50	18	43	797		1	1	0.225	1	0.149	0.929	0.995	0.597	0.696	0.733	0.008	0.137	1	0.575	0.639	0.978	0.717	1	0.992	1	0.178	0
Chloroflexi sp. DTU163	DTU163	0	80	21	113	47	101	79	50	146	75	124	149	34	56	62	13	178	111	71	43	34	737		1	1	0.696	0.997	0.757	0.998	0.08	0.4	0.535	0.995	0.018	0	0.081	0.876	0.905	0.985	0.997	0.987	0.319	0.237	0.733	0
Methanoculleus sp. DTU006	DTU006	2	126	10	95	45	53	114	23	115	57	100	42	18	58	88	8	177	166	37	12	17	534		0	0	0.993	0.995	0.381	1	0	0.999	0.796	1	0.059	1	0.842	0.269	0	0.997	0.542	0	0.999	1	0.997	0.095
Methanoculleus sp. DTU007	DTU007	1	100	10	90	40	52	110	20	83	45	62	53	10	56	76	12	179	158	49	11	13	578		0.054	0.147	0.988	0.997	0.576	1	0	1	1	1	0.993	1	0.999	0.264	0.008	0.915	0.239	0	0.753	1	1	0
Euryarchaeota sp. DTU008	DTU008	0	133	17	140	44	67	116	23	147	69	63	61	6	59	80	11	204	137	37	15	16	402		1	0	0.711	0.019	0.346	1	0	0.998	0.003	0.883	0.994	0.997	1	0.164	0.002	0.961	0.004	0.004	0.995	0.999	0.999	1
Methanothermobacter sp. DTU051	DTU051	1	75	5	49	38	25	74	13	88	33	39	18	1	30	27	5	115	96	17	12	3	193		0.017	0	0.975	0.959	0	1	0	0.969	0	0.941	0.803	1	1	0.326	0.789	0.95	0.004	0	0.994	0.907	1	1
Methanosarcina sp. DTU271	DTU271	1	159	23	163	43	73	111	25	116	83	80	80	29	85	97	24	292	243	99	30	48	730		0.083	0.002	0.752	0.592	0.99	1	0	1	1	1	1	1	0.642	0.06	0.039	0.566	0	0	0.005	0.989	0.201	0.054
Fibrobacteres sp. DTU171	DTU171	0	93	26	89	28	66	79	33	170	44	96	136	26	63	44	15	144	90	43	52	36	893		1	0.964	0.264	1	1	1	0.076	0.992	0.013	1	0.723	0.002	0.522	0.578	1	0.934	1	1	1	0.012	0.613	0
Clostridiales sp. DTU010	DTU010	0	79	26	146	43	181	26	30	150	107	95	90	50	62	86	12	175	146	63	32	40	471		1	0.994	0.161	0.105	0.735	0	1	0.992	0.064	0.026	0.452	0.611	0	0.326	0.004	0.974	0.91	0.014	0.382	0.717	0.156	1
Clostridia sp. DTU011	DTU011	0	119	26	109	48	82	43	31	130	78	70	84	4	44	52	14	161	128	35	27	38	394		1	0	0.027	0.499	0.072	0.948	0.909	0.857	0.023	0.3	0.819	0.189	1	0.734	0.649	0.726	0.48	0.004	0.99	0.674	0.026	1
Clostridiales sp. DTU012	DTU012	0	82	26	167	58	168	49	36	129	85	75	89	51	52	56	16	159	134	66	43	34	507		1	0.98	0.125	0	0.031	0	0.966	0.898	0.596	0.606	0.973	0.595	0	0.773	0.881	0.792	0.993	0.124	0.223	0.069	0.497	0.977
Clostridiales sp. DTU013	DTU013	0	79	28	131	47	133	41	37	148	121	89	93	59	44	57	12	163	129	111	41	43	575		1	0.999	0.106	0.662	0.577	0.124	1	0.915	0.171	0.001	0.787	0.619	0	0.995	0.926	0.976	0.997	0.451	0	0.213	0.08	0.43
Clostridia sp. DTU014	DTU014	0	67	31	129	49	223	58	29	143	104	91	90	51	49	57	11	176	133	59	36	46	589		1	1	0.043	0.831	0.525	0	0.861	1	0.405	0.122	0.813	0.823	0	0.965	0.94	0.995	0.986	0.434	0.763	0.585	0.042	0.469
Syntrophothermus sp. DTU052	DTU052	0	131	34	133	48	54	89	115	152	107	83	89	53	62	71	56	189	168	83	46	25	426		1	0.006	0.006	0.61	0.521	1	0.002	0	0.109	0.047	0.935	0.798	0	0.438	0.369	0	0.834	0	0.006	0.046	0.982	1
Syntrophomonas sp. DTU017	DTU017	0	66	25	122	49	134	32	40	102	89	97	94	59	50	45	12	155	99	84	45	42	560		1	0.998	0.129	0.626	0.218	0.01	1	0.624	0.99	0.282	0.165	0.238	0	0.784	0.994	0.965	0.991	0.973	0	0.019	0.045	0.032
Syntrophomonas sp. DTU018	DTU018	0	174	30	186	49	56	87	97	120	92	75	72	50	55	58	16	176	131	88	32	24	538		1	0	0.056	0	0.491	1	0	0	0.966	0.532	0.993	1	0	0.807	0.898	0.87	0.979	0.438	0	0.81	0.987	0.984
Syntrophomonas sp. DTU019	DTU019	0	152	34	143	55	51	104	53	135	106	84	77	10	81	82	26	182	167	66	38	19	452		1	0	0.008	0.233	0.146	1	0	0.126	0.498	0.038	0.904	0.975	1	0.004	0.029	0.109	0.896	0	0.292	0.349	0.999	1
Syntrophomonadaceae sp. DTU190	DTU190	0	173	28	154	61	53	89	129	149	124	107	86	56	80	82	31	214	173	102	44	34	553		1	0	0.306	0.657	0.241	1	0.048	0	0.809	0.032	0.687	0.997	0	0.089	0.337	0.046	0.876	0.012	0	0.35	0.867	1
Clostridia sp. DTU191	DTU191	0	62	19	105	21	46	40	34	65	52	52	49	26	30	41	19	122	68	45	28	10	287		1	0.276	0.027	0	0.868	0.997	0.236	0.028	0.883	0.375	0.573	0.693	0.001	0.728	0.256	0.014	0.083	0.598	0.033	0.043	0.996	0.955
Clostridiales sp. DTU192	DTU192	0	126	39	178	41	87	65	53	119	95	75	99	56	63	87	25	204	143	77	48	31	446		1	0.005	0	0	0.827	1	0.353	0.094	0.903	0.234	0.987	0.219	0	0.283	0.003	0.102	0.191	0.045	0.016	0.017	0.7	1
Firmicutes sp. DTU193	DTU193	0	88	19	106	53	108	49	51	137	112	75	79	9	46	42	12	182	105	60	27	44	432		1	0.564	0.455	0.814	0.028	0.274	0.805	0.019	0.023	0	0.784	0.592	0.999	0.782	0.989	0.942	0.142	0.643	0.197	0.766	0.004	0.998
Firmicutes sp. DTU194	DTU194	0	65	21	85	42	120	38	23	77	77	76	58	7	25	37	6	155	81	43	15	32	581		1	0.976	0.187	0.992	0.242	0.005	0.976	0.989	1	0.255	0.473	0.983	1	1	0.991	0.999	0.543	0.982	0.819	0.996	0.169	0
Firmicutes sp. DTU195	DTU195	0	137	18	177	73	192	70	66	170	119	86	76	9	54	73	25	276	130	78	19	63	543		1	0.041	0.943	0.016	0.005	0	0.6	0.009	0.066	0.04	0.99	0.999	1	0.968	0.644	0.33	0.002	0.887	0.205	1	0	1
Clostridia sp. DTU196	DTU196	0	86	34	131	55	127	95	48	154	129	122	125	75	67	64	18	208	146	129	51	42	853		1	1	0.1	1	0.804	0.987	0.066	0.925	0.947	0.09	0.547	0.382	0	0.883	0.995	0.967	0.999	0.916	0	0.207	0.656	0
Clostridia sp. DTU197	DTU197	0	53	3	23	17	34	27	21	46	33	28	19	3	11	17	5	47	37	15	5	4	141		1	0	0.954	0.997	0.188	0.498	0.028	0.016	0.1	0.077	0.423	0.942	0.974	0.94	0.685	0.671	0.912	0.424	0.743	0.975	0.988	0.958
Clostridiales sp. DTU198	DTU198	0	70	24	93	31	76	48	22	75	66	70	74	46	34	27	21	124	94	60	34	18	290		1	0.313	0.004	0.194	0.438	0.483	0.108	0.912	0.897	0.103	0.106	0.03	0	0.752	0.995	0.011	0.545	0.044	0.001	0.008	0.823	1
Clostridiales sp. DTU199	DTU199	0	65	19	119	34	187	44	36	129	123	75	77	52	44	47	16	142	111	107	36	36	385		1	1	0.474	0.398	0.903	0	0.944	0.689	0.143	0	0.799	0.715	0	0.889	0.943	0.626	0.988	0.433	0	0.182	0.13	1
Clostridiales sp. DTU020	DTU020	0	89	16	112	55	60	43	45	141	58	75	45	1	34	47	15	147	78	36	12	17	341		1	0.026	0.433	0.029	0	0.995	0.551	0.002	0	0.734	0.128	0.999	1	0.887	0.465	0.381	0.149	0.857	0.902	0.999	0.955	0.997
Clostridiales sp. DTU200	DTU200	0	97	21	128	38	152	58	42	110	131	114	111	39	56	57	16	185	151	104	34	54	661		1	0.972	0.729	0.961	0.985	0.023	0.946	0.87	0.999	0	0.173	0.227	0.012	0.901	0.986	0.931	0.992	0.149	0	0.818	0.003	0.018
Firmicutes sp. DTU201	DTU201	1	101	19	140	40	120	49	31	86	79	92	78	8	48	76	13	168	106	34	35	32	653		0.057	0.401	0.644	0.139	0.793	0.257	0.948	0.988	1	0.77	0.425	0.91	1	0.884	0.043	0.945	0.947	0.913	0.999	0.413	0.57	0
Clostridiales sp. DTU202	DTU202	0	63	16	65	23	22	38	22	96	53	59	36	1	22	37	7	91	70	37	17	11	165		1	0.007	0.035	0.253	0.363	1	0.031	0.355	0	0.023	0.004	0.863	1	0.832	0.102	0.779	0.382	0.033	0.045	0.403	0.901	1
Clostridiales sp. DTU203	DTU203	0	62	18	123	40	131	34	27	76	84	87	60	56	41	49	21	124	82	89	30	16	378		1	0.974	0.328	0.008	0.209	0	0.984	0.889	0.998	0.019	0.038	0.915	0	0.726	0.567	0.058	0.977	0.9	0	0.284	0.982	0.991
Clostridia sp. DTU204	DTU204	0	107	32	110	42	63	66	60	109	73	86	76	42	46	62	21	170	89	53	31	20	261		1	0	0	0.141	0.139	0.999	0.004	0	0.202	0.253	0.045	0.261	0	0.424	0.036	0.056	0.027	0.722	0.177	0.213	0.903	1
Firmicutes sp. DTU205	DTU205	0	23	8	12	18	59	12	16	80	39	68	22	1	22	30	7	68	49	9	9	13	247		1	1	0.575	1	0.556	0.04	0.997	0.682	0	0.26	0	0.998	1	0.617	0.223	0.644	0.87	0.521	1	0.944	0.611	0.013
Firmicutes sp. DTU206	DTU206	0	69	21	119	49	105	48	46	153	85	86	63	1	43	75	17	141	91	36	15	24	334		1	0.917	0.146	0.043	0.01	0.049	0.515	0.031	0	0.023	0.049	0.868	1	0.632	0	0.329	0.766	0.71	0.961	0.998	0.699	1
Clostridiales sp. DTU207	DTU207	0	85	17	102	40	107	59	35	99	91	95	89	61	50	46	11	185	105	46	56	40	820		1	0.995	0.896	1	0.942	0.963	0.821	0.976	1	0.671	0.7	0.843	0	0.953	0.998	0.989	0.959	0.99	0.994	0	0.261	0
Firmicutes sp. DTU208	DTU208	0	121	14	180	55	138	60	52	138	81	83	71	2	48	65	21	232	114	42	22	34	493		1	0.026	0.953	0	0.086	0.015	0.558	0.098	0.3	0.768	0.868	0.993	1	0.914	0.486	0.366	0.001	0.789	0.995	0.994	0.478	0.998
Firmicutes sp. DTU209	DTU209	0	13	13	4	12	21	3	3	92	32	41	36	18	21	13	1	50	42	11	29	7	219		1	1	0.019	1	0.824	0.999	1	1	0	0.271	0.034	0.16	0.001	0.344	0.984	0.994	0.976	0.414	0.99	0	0.933	0
Clostridia sp. DTU021	DTU021	0	134	28	158	42	89	78	79	126	107	86	94	2	54	59	36	210	136	54	21	35	475		1	0.001	0.077	0.009	0.791	0.998	0.017	0	0.776	0.017	0.826	0.476	1	0.763	0.829	0	0.133	0.143	0.836	0.997	0.453	1
Clostridia sp. DTU210	DTU210	0	43	20	64	19	96	27	10	65	57	52	79	41	28	32	7	107	81	35	34	19	299		1	0.988	0.017	0.912	0.942	0	0.94	1	0.918	0.183	0.611	0	0	0.837	0.871	0.915	0.655	0.101	0.465	0.004	0.586	0.887
Clostridiales sp. DTU211	DTU211	0	87	33	138	50	156	53	45	134	129	90	106	61	49	53	18	177	137	118	43	47	511		1	0.977	0.015	0.498	0.44	0.001	0.952	0.58	0.682	0	0.834	0.178	0	0.959	0.986	0.738	0.984	0.262	0	0.135	0.025	1
Firmicutes sp. DTU212	DTU212	0	47	20	62	28	82	37	31	87	71	103	64	17	33	30	11	116	76	39	32	16	841		1	1	0.436	1	0.986	0.986	0.998	0.93	0.999	0.846	0.017	0.989	0.855	0.994	1	0.961	1	1	0.993	0.443	0.999	0
Firmicutes sp. DTU213	DTU213	0	100	16	156	49	58	55	41	142	101	81	54	0	32	91	18	194	110	57	15	43	341		1	0.053	0.671	0	0.058	1	0.322	0.223	0.001	0	0.356	0.999	1	0.992	0	0.352	0.005	0.254	0.188	0.998	0.006	1
Firmicutes sp. DTU214	DTU214	0	74	35	70	39	42	32	40	109	67	103	67	27	52	36	14	128	82	30	37	31	637		1	0.905	0	1	0.51	1	1	0.286	0.603	0.83	0.001	0.893	0.066	0.324	0.996	0.738	0.999	0.989	1	0.077	0.326	0
Firmicutes sp. DTU215	DTU215	0	86	27	141	54	210	72	45	157	190	142	131	58	70	74	20	275	162	151	49	74	975		1	1	0.834	1	0.981	0.005	0.987	1	1	0	0.429	0.762	0	0.974	0.997	0.971	0.835	0.969	0	0.705	0	0
Clostridiales sp. DTU216	DTU216	0	86	22	115	34	121	45	23	141	122	105	120	52	34	57	24	177	127	89	39	43	754		1	0.997	0.631	0.998	0.993	0.731	1	1	0.665	0.005	0.395	0.031	0	1	0.975	0.299	0.995	0.793	0.003	0.474	0.158	0
Clostridiales sp. DTU217	DTU217	0	114	35	146	69	112	70	58	183	123	159	145	32	76	81	21	234	172	83	41	31	981		1	0.999	0.18	1	0.362	1	0.99	0.739	0.67	0.574	0.006	0.107	0.662	0.785	0.901	0.927	0.996	0.578	0.65	0.904	0.998	0
Syntrophomonadaceae sp. DTU218	DTU218	0	83	25	112	45	65	98	55	119	92	95	86	7	56	76	18	150	142	51	20	30	559		1	0.953	0.137	0.897	0.451	1	0	0.025	0.769	0.181	0.255	0.582	1	0.506	0.06	0.571	0.997	0.008	0.848	0.997	0.677	0.05
Firmicutes sp. DTU219	DTU219	0	59	9	98	29	64	43	21	114	61	62	46	1	28	37	8	93	53	31	12	15	265		1	0.345	0.848	0.002	0.258	0.542	0.07	0.796	0	0.064	0.087	0.782	1	0.798	0.461	0.833	0.94	0.986	0.724	0.968	0.849	0.998
Clostridia sp. DTU022	DTU022	0	111	11	135	51	85	47	41	135	80	104	58	1	44	72	17	200	129	36	17	39	393		1	0.007	0.976	0.023	0.062	0.963	0.823	0.34	0.027	0.347	0.004	0.997	1	0.827	0.02	0.544	0.004	0.013	0.997	0.997	0.036	1
Syntrophomonadaceae sp. DTU220	DTU220	0	37	15	75	24	77	21	14	91	46	38	37	12	35	56	5	97	65	30	13	17	199		1	0.973	0.08	0.083	0.365	0	0.977	0.955	0.001	0.285	0.866	0.897	0.474	0.107	0	0.968	0.34	0.234	0.457	0.858	0.437	1
Firmicutes sp. DTU221	DTU221	0	137	27	171	64	246	87	49	139	158	89	112	48	83	95	25	235	162	60	45	57	609		1	0.288	0.503	0.429	0.29	0	0.194	0.842	0.998	0	1	0.712	0.001	0.172	0.097	0.504	0.791	0.36	0.99	0.49	0.017	1
Firmicutes sp. DTU222	DTU222	0	45	22	107	35	33	30	25	88	60	70	58	34	38	46	12	149	102	45	31	39	453		1	1	0.062	0.131	0.445	1	0.995	0.903	0.839	0.743	0.398	0.894	0.002	0.781	0.639	0.746	0.222	0.106	0.47	0.148	0.002	0.001
Firmicutes sp. DTU223	DTU223	0	90	32	147	44	56	80	25	138	97	79	83	54	63	79	8	152	149	80	53	23	394		1	0.607	0.003	0.007	0.381	1	0.002	0.996	0.044	0.043	0.754	0.564	0	0.075	0.006	1	0.98	0	0.002	0	0.94	1
Firmicutes sp. DTU224	DTU224	0	25	4	16	18	59	7	16	84	24	55	28	1	19	16	1	57	41	11	5	6	176		1	0.941	0.911	1	0.256	0.001	0.999	0.371	0	0.829	0	0.651	1	0.518	0.911	0.998	0.805	0.494	0.993	0.988	0.959	0.65
Clostridiales sp. DTU225	DTU225	0	87	19	94	44	105	39	40	128	84	80	72	23	38	43	13	144	103	54	22	26	446		1	0.313	0.355	0.904	0.183	0.16	0.957	0.238	0.031	0.065	0.327	0.641	0.242	0.949	0.934	0.792	0.9	0.396	0.259	0.919	0.618	0.596
Firmicutes sp. DTU226	DTU226	0	79	20	129	53	112	49	42	144	95	76	85	11	41	42	12	175	101	56	25	33	399		1	0.83	0.334	0.061	0.016	0.096	0.733	0.221	0	0.006	0.683	0.221	0.989	0.905	0.978	0.903	0.189	0.647	0.283	0.841	0.214	1
Erysipelothrix sp. DTU227	DTU227	0	21	10	29	19	53	18	18	71	43	56	26	0	14	20	5	64	37	17	3	16	177		1	0.998	0.196	0.996	0.271	0.036	0.801	0.266	0	0.012	0	0.896	1	0.943	0.73	0.806	0.695	0.874	0.837	0.999	0.136	0.909
Clostridiales sp. DTU228	DTU228	0	99	19	142	53	201	42	43	151	89	84	61	1	52	91	16	196	110	52	13	37	452		1	0.461	0.633	0.079	0.106	0	0.991	0.467	0.02	0.32	0.734	0.998	1	0.717	0.002	0.762	0.223	0.809	0.827	1	0.236	1
Clostridiales sp. DTU229	DTU229	0	83	18	130	44	62	59	36	81	69	57	69	17	36	52	13	116	65	48	33	8	252		1	0.011	0.117	0	0.008	0.946	0.002	0.073	0.617	0.032	0.598	0.088	0.343	0.571	0.052	0.463	0.748	0.953	0.064	0.009	1	1
Clostridiale sp. DTU023	DTU023	0	82	14	90	48	52	35	29	128	46	79	49	0	48	51	7	148	72	21	15	18	245		1	0.01	0.396	0.161	0	0.996	0.727	0.352	0	0.898	0.002	0.869	1	0.028	0.04	0.955	0.002	0.69	0.998	0.937	0.75	1
Clostridiales sp. DTU230	DTU230	0	64	15	120	56	190	43	27	135	86	86	66	0	54	95	15	167	118	32	15	37	474		1	1	0.886	0.532	0.018	0	0.979	0.989	0.105	0.258	0.455	0.989	1	0.474	0	0.767	0.787	0.317	1	0.998	0.126	0.954
Clostridiales sp. DTU231	DTU231	0	106	19	127	39	186	38	40	119	89	80	49	1	42	66	26	178	101	54	12	38	453		1	0.077	0.514	0.227	0.703	0	0.995	0.466	0.542	0.127	0.68	1	1	0.957	0.193	0.032	0.41	0.863	0.589	1	0.106	0.994
Syntrophomonadaceae sp. DTU232	DTU232	0	118	30	114	49	85	74	65	133	82	105	118	55	56	48	17	167	127	55	53	18	425		1	0.01	0.018	0.853	0.212	0.996	0.023	0	0.22	0.566	0.032	0	0	0.455	0.973	0.641	0.896	0.164	0.644	0.001	0.997	1
Clostridiales sp. DTU233	DTU233	0	111	30	147	45	176	44	31	109	103	65	91	44	48	58	18	220	110	64	26	54	516		1	0.173	0.035	0.084	0.628	0	0.991	0.987	0.994	0.054	0.999	0.583	0	0.945	0.874	0.652	0.013	0.906	0.311	0.962	0	0.966
Clostridiales sp. DTU234	DTU234	0	80	28	122	42	109	49	23	115	99	63	78	56	51	48	15	143	109	70	27	29	337		1	0.582	0.005	0.045	0.209	0.037	0.583	0.991	0.198	0.001	0.928	0.296	0	0.262	0.722	0.584	0.835	0.133	0.002	0.609	0.374	1
Clostridiales sp. DTU235	DTU235	0	56	7	107	38	121	33	32	67	77	74	40	2	34	40	15	120	65	48	10	24	468		1	0.972	0.989	0.046	0.14	0	0.951	0.42	1	0.021	0.122	0.999	1	0.858	0.818	0.376	0.907	0.993	0.199	1	0.473	0
Clostridia sp. DTU236	DTU236	0	124	27	141	45	105	62	57	122	104	79	100	14	61	53	24	186	126	67	31	38	421		1	0.004	0.072	0.079	0.48	0.71	0.346	0.01	0.628	0.017	0.863	0.101	0.984	0.222	0.909	0.104	0.412	0.192	0.098	0.635	0.149	1
Firmicutes sp. DTU238	DTU238	0	24	11	57	26	59	14	16	58	29	61	46	1	18	58	8	87	52	25	5	19	209		1	1	0.285	0.512	0.101	0.12	0.999	0.767	0.485	0.948	0	0.164	1	0.941	0	0.586	0.36	0.627	0.639	0.999	0.127	0.994
Clostridiales sp. DTU239	DTU239	0	91	13	144	54	177	52	48	138	75	84	71	0	49	60	18	228	96	27	14	51	670		1	0.965	0.988	0.319	0.243	0	0.969	0.413	0.579	0.978	0.93	0.998	1	0.963	0.871	0.718	0.028	1	1	1	0.003	0
Firmicutes sp. DTU240	DTU240	0	104	18	109	59	82	72	45	145	87	114	65	4	61	89	20	187	158	35	19	40	476		1	0.249	0.715	0.962	0.012	1	0.042	0.33	0.055	0.39	0.003	0.999	1	0.254	0.001	0.384	0.422	0	1	0.997	0.104	0.999
Clostridiales sp. DTU024	DTU024	0	107	19	163	57	214	46	45	139	103	86	63	2	53	80	20	201	127	45	15	39	464		1	0.328	0.707	0.004	0.059	0	0.985	0.455	0.313	0.078	0.83	1	1	0.777	0.044	0.462	0.322	0.396	0.988	1	0.219	1
Clostridia sp. DTU241	DTU241	0	97	23	107	42	131	48	41	120	94	87	96	28	51	68	13	212	108	58	27	29	746		1	0.912	0.482	0.999	0.884	0.262	0.996	0.832	0.977	0.521	0.932	0.627	0.363	0.947	0.63	0.979	0.341	0.984	0.844	0.967	0.899	0
Erysipelotrichaceae sp. DTU242	DTU242	0	64	20	71	38	94	27	37	137	68	90	53	4	39	66	6	138	88	28	17	30	212		1	0.607	0.052	0.955	0.075	0.016	0.987	0.058	0	0.053	0	0.832	1	0.434	0.001	0.989	0.095	0.187	0.981	0.908	0.046	1
Clostridiales sp. DTU268	DTU268	0	55	23	101	53	102	31	37	123	88	61	77	39	44	50	12	117	72	46	25	21	380		1	0.995	0.046	0.348	0.002	0.034	0.995	0.23	0.005	0.003	0.867	0.135	0	0.454	0.428	0.787	0.99	0.987	0.452	0.571	0.855	0.959
Clostridia sp. DTU269	DTU269	0	78	22	147	37	157	51	30	120	55	62	65	38	56	43	15	152	99	37	26	10	207		1	0.277	0.038	0	0.269	0	0.149	0.584	0.002	0.816	0.703	0.526	0	0.01	0.73	0.387	0.077	0.094	0.849	0.4	1	1
Firmicutes sp. DTU270	DTU270	0	89	15	100	42	66	43	30	131	69	83	39	0	42	73	11	155	84	27	18	27	385		1	0.067	0.614	0.409	0.091	0.995	0.661	0.684	0.001	0.316	0.04	1	1	0.566	0	0.835	0.115	0.811	1	0.954	0.354	0.919
Firmicutes sp. DTU124	DTU124	0	38	6	41	21	43	24	18	64	36	74	41	3	28	25	6	66	43	21	10	29	522		1	0.999	0.982	1	0.876	0.999	0.983	0.935	0.9	0.984	0.001	0.949	1	0.834	0.984	0.957	1	1	0.996	0.992	0.014	0
Clostridia sp. DTU025	DTU025	0	105	29	200	53	137	51	35	136	106	83	85	13	58	76	16	189	149	58	33	39	410		1	0.289	0.035	0	0.132	0.013	0.926	0.917	0.288	0.011	0.823	0.747	0.997	0.442	0.062	0.791	0.501	0.008	0.585	0.581	0.152	1
Peptococcaceae sp. DTU027	DTU027	0	119	34	188	47	80	63	37	133	109	86	87	55	58	88	25	202	141	74	42	36	516		1	0.106	0.004	0	0.574	1	0.552	0.931	0.654	0.023	0.881	0.826	0	0.624	0.002	0.126	0.39	0.106	0.074	0.128	0.42	1
Clostridiales sp. DTU053	DTU053	0	73	11	93	38	85	42	45	101	75	108	85	17	53	31	17	165	89	48	37	42	832		1	1	0.993	1	0.918	1	0.997	0.458	0.998	0.934	0.076	0.837	0.954	0.805	1	0.75	0.995	1	0.975	0.379	0.083	0
Clostridiaceae sp. DTU054	DTU054	0	140	43	188	63	192	99	73	173	175	208	192	54	92	79	29	302	181	120	47	57	1324		1	1	0.27	1	0.994	0.961	0.947	0.838	1	0.149	0.003	0.036	0.064	0.945	1	0.898	1	1	0.227	0.988	0.753	0
Halothermothrix sp. DTU029	DTU029	0	77	28	116	55	119	39	36	139	98	83	102	54	53	69	14	158	143	62	35	38	408		1	0.977	0.027	0.673	0.032	0.107	0.993	0.786	0.044	0.027	0.605	0.026	0	0.53	0.102	0.832	0.94	0.002	0.186	0.305	0.109	1
Clostridia sp. DTU030	DTU030	0	144	32	151	44	67	68	29	147	97	82	84	46	49	48	19	181	178	75	40	22	439		1	0	0.005	0.017	0.605	1	0.168	0.984	0.053	0.11	0.839	0.75	0	0.873	0.989	0.524	0.737	0	0.023	0.174	0.986	1
Clostridiales sp. DTU032	DTU032	0	105	18	143	53	97	47	56	120	84	96	70	2	40	54	18	193	89	34	22	28	365		1	0.012	0.505	0.001	0.011	0.499	0.727	0.001	0.168	0.097	0.012	0.81	1	0.918	0.518	0.347	0.003	0.931	0.992	0.908	0.536	1
Clostridiales sp. DTU033	DTU033	0	76	22	118	50	58	40	34	139	84	79	78	34	30	44	17	119	83	45	27	20	276		1	0.266	0.038	0.003	0.001	0.995	0.71	0.281	0	0.002	0.032	0.035	0	0.959	0.626	0.19	0.928	0.611	0.327	0.283	0.794	1
Clostridiales sp. DTU055	DTU055	0	83	30	126	54	150	75	33	137	100	93	131	70	48	67	16	211	158	84	55	40	607		1	1	0.118	0.986	0.462	0.052	0.26	0.994	0.889	0.509	0.917	0.005	0	0.992	0.831	0.912	0.696	0.044	0.021	0.006	0.391	0.817
Clostridiaceae sp. DTU059	DTU059	0	85	27	137	53	121	46	41	142	113	92	84	58	51	70	16	158	123	93	35	36	435		1	0.92	0.072	0.139	0.099	0.165	0.965	0.555	0.066	0	0.369	0.685	0	0.744	0.164	0.723	0.985	0.29	0	0.381	0.266	1
Clostridiales sp. DTU060	DTU060	0	89	25	131	45	157	47	41	144	115	95	92	60	57	64	10	170	123	92	36	24	479		1	0.901	0.181	0.457	0.552	0	0.974	0.648	0.11	0.001	0.344	0.454	0	0.51	0.514	0.992	0.953	0.458	0	0.426	0.958	0.998
Clostridia sp. DTU062	DTU062	0	81	29	142	51	76	40	32	121	88	94	84	52	63	60	11	152	136	69	43	39	377		1	0.839	0.012	0.008	0.059	0.997	0.977	0.878	0.293	0.104	0.061	0.372	0	0.058	0.357	0.948	0.933	0.008	0.01	0.013	0.046	1
Tepidanaerobacter sp. DTU063	DTU063	0	131	34	192	51	112	64	34	135	120	94	92	60	60	74	24	213	162	91	57	26	428		1	0.007	0.005	0	0.387	0.872	0.578	0.982	0.678	0.002	0.708	0.722	0	0.589	0.265	0.226	0.222	0.003	0.001	0.001	0.959	1
Clostridia sp. DTU065	DTU065	0	75	28	133	53	140	40	35	141	90	82	102	47	53	73	11	182	156	47	36	54	536		1	0.998	0.081	0.503	0.215	0.014	0.999	0.938	0.286	0.477	0.931	0.194	0	0.815	0.218	0.988	0.885	0.002	0.982	0.496	0	0.908
Clostridiales sp. DTU066	DTU066	0	99	31	170	57	55	69	31	137	121	86	91	54	68	76	11	183	143	87	46	19	461		1	0.567	0.015	0	0.045	1	0.141	0.984	0.308	0	0.769	0.523	0	0.072	0.08	0.986	0.743	0.026	0.001	0.026	0.995	1
Clostridiales sp. DTU069	DTU069	0	82	26	128	49	196	62	40	145	141	95	94	54	57	62	16	192	121	142	42	37	504		1	1	0.312	0.921	0.602	0	0.746	0.892	0.479	0	0.774	0.768	0	0.791	0.894	0.891	0.915	0.922	0	0.232	0.493	1
Clostridiales sp. DTU070	DTU070	0	95	32	163	54	256	63	51	160	167	101	118	50	62	62	20	217	154	119	38	60	690		1	0.999	0.194	0.773	0.829	0	0.989	0.821	0.893	0	0.984	0.641	0.002	0.967	0.999	0.883	0.994	0.761	0	0.886	0.013	0.932
Clostridiales sp. DTU074	DTU074	0	118	26	162	48	250	70	32	129	120	86	89	19	57	46	24	265	143	62	21	44	469		1	0.241	0.275	0.048	0.645	0	0.361	0.993	0.907	0.007	0.958	0.882	0.937	0.823	1	0.257	0	0.216	0.714	1	0.119	1
Clostridiales sp. DTU075	DTU075	0	101	27	149	53	168	54	37	138	105	80	93	56	57	51	19	221	158	79	37	47	401		1	0.553	0.098	0.064	0.176	0	0.853	0.882	0.335	0.036	0.935	0.467	0	0.584	0.976	0.539	0.017	0.001	0.01	0.368	0.016	1
Clostridia sp. DTU077	DTU077	0	135	31	130	38	96	74	63	131	90	71	98	0	48	57	26	190	128	45	22	20	351		1	0	0.007	0.084	0.671	0.755	0.007	0	0.081	0.079	0.914	0.027	1	0.69	0.556	0.02	0.051	0.036	0.895	0.956	0.983	1
Clostridiales sp. DTU078	DTU078	0	91	23	138	49	156	58	48	136	86	73	82	20	47	48	20	195	93	48	20	31	485		1	0.684	0.231	0.078	0.183	0	0.504	0.121	0.123	0.329	0.947	0.713	0.749	0.866	0.969	0.326	0.127	0.978	0.906	0.996	0.554	0.932
Clostridiaceae sp. DTU079	DTU079	0	82	43	160	57	112	92	33	154	163	113	144	82	77	78	9	233	170	166	61	42	974		1	1	0.005	0.992	0.907	1	0.39	1	0.999	0	0.982	0.163	0	0.76	0.979	1	0.999	0.759	0	0.055	0.865	0
Clostridia sp. DTU080	DTU080	0	99	27	148	48	333	69	38	131	99	109	108	43	59	50	28	260	159	52	40	46	732		1	0.998	0.49	0.968	0.955	0	0.899	0.999	0.999	0.924	0.864	0.861	0.023	0.979	1	0.291	0.202	0.496	0.999	0.759	0.34	0.145
Clostridiales sp. DTU081	DTU081	0	65	4	58	27	36	27	18	104	27	48	36	0	29	41	4	78	40	12	13	13	251		1	0.004	0.987	0.614	0.109	0.99	0.592	0.668	0	0.993	0.175	0.824	1	0.289	0.021	0.975	0.861	0.989	1	0.807	0.762	0.455
Clostridiales sp. DTU082	DTU082	0	147	24	171	59	188	59	56	157	149	101	82	13	66	109	29	253	161	91	23	44	567		1	0.019	0.634	0.16	0.358	0	0.979	0.339	0.656	0	0.894	0.999	1	0.732	0	0.129	0.083	0.159	0.015	1	0.307	1
Clostridiales sp. DTU083	DTU083	0	76	27	119	42	107	39	29	94	80	68	75	38	46	49	7	137	113	58	25	21	267		1	0.396	0.001	0.01	0.097	0.008	0.816	0.695	0.583	0.017	0.458	0.133	0	0.25	0.402	0.988	0.565	0.009	0.016	0.505	0.753	1
Clostridia sp. DTU084	DTU084	0	104	31	129	50	127	58	34	142	116	90	113	64	47	60	21	197	130	55	58	29	457		1	0.43	0.016	0.583	0.272	0.136	0.695	0.935	0.207	0	0.622	0.011	0	0.923	0.757	0.342	0.316	0.224	0.774	0	0.8	1
Clostridiales sp. DTU087	DTU087	0	90	32	137	44	175	53	29	119	105	73	99	56	50	82	23	166	135	66	55	25	323		1	0.572	0.002	0.048	0.364	0	0.686	0.962	0.507	0.001	0.909	0.039	0	0.653	0.001	0.094	0.757	0.013	0.06	0	0.871	1
Clostridiales sp. DTU089	DTU089	0	58	11	53	33	99	36	19	68	52	41	50	6	14	43	10	101	54	44	14	16	502		1	0.833	0.798	1	0.306	0.003	0.76	0.969	0.983	0.727	0.996	0.911	1	1	0.472	0.774	0.982	1	0.208	0.977	0.928	0
Clostridiales sp. DTU090	DTU090	0	88	19	90	48	64	38	48	115	50	76	44	0	36	49	16	157	72	23	11	29	249		1	0.002	0.069	0.271	0	0.876	0.624	0	0.001	0.836	0.012	0.984	1	0.616	0.131	0.171	0.001	0.786	0.997	0.997	0.063	1
Erysipelothrix sp. DTU091	DTU091	0	51	13	62	47	95	27	24	113	63	83	46	3	41	60	3	114	70	31	13	31	254		1	0.924	0.473	0.987	0	0.001	0.965	0.729	0	0.084	0	0.903	1	0.139	0.002	1	0.595	0.73	0.855	0.964	0.013	1
Clostridiales sp. DTU092	DTU092	0	90	25	153	46	203	60	42	124	105	83	87	54	55	48	20	237	138	74	33	51	497		1	0.973	0.31	0.103	0.674	0	0.745	0.77	0.935	0.107	0.954	0.87	0	0.809	0.997	0.57	0.005	0.229	0.115	0.767	0.008	1
Clostridiales sp. DTU093	DTU093	0	137	29	197	42	143	103	34	133	85	90	84	53	52	51	22	174	156	66	45	14	334		1	0	0.033	0	0.678	0.001	0	0.922	0.285	0.484	0.486	0.722	0	0.74	0.947	0.239	0.835	0	0.151	0.026	1	1
Clostridia sp. DTU095	DTU095	0	188	35	144	57	95	77	63	127	118	118	93	45	61	70	24	192	148	75	41	21	510		1	0	0.011	0.485	0.179	0.998	0.121	0.014	0.949	0.013	0.041	0.809	0	0.643	0.582	0.306	0.918	0.124	0.139	0.34	0.998	1
Eubacteriaceae sp. DTU096	DTU096	0	117	16	161	49	72	53	44	130	79	77	47	5	42	53	19	164	118	44	20	22	297		1	0	0.532	0	0.019	0.971	0.228	0.04	0.003	0.069	0.241	1	1	0.685	0.349	0.152	0.087	0.01	0.66	0.921	0.798	1
Clostridia sp. DTU097	DTU097	0	82	32	135	42	63	38	30	131	86	82	74	39	46	42	25	191	122	55	33	51	452		1	0.835	0.002	0.038	0.46	1	0.992	0.939	0.114	0.168	0.519	0.855	0	0.81	0.993	0.038	0.061	0.119	0.438	0.345	0.002	0.984
Pelotomaculum sp. DTU098	DTU098	0	156	31	173	56	80	103	53	139	101	103	108	6	67	91	22	229	162	72	31	30	526		1	0	0.074	0.017	0.319	1	0	0.312	0.843	0.436	0.582	0.333	1	0.443	0.027	0.495	0.185	0.016	0.343	0.923	0.92	1
Clostridiales sp. DTU099	DTU099	0	112	14	169	58	117	74	48	128	87	81	71	5	50	63	21	171	96	53	19	32	354		1	0.006	0.853	0	0.001	0.052	0.004	0.061	0.097	0.108	0.485	0.877	1	0.545	0.174	0.155	0.348	0.862	0.483	0.988	0.324	1
Clostridiales sp. DTU100	DTU100	0	87	14	155	46	76	48	37	109	65	73	46	0	42	98	21	184	101	31	15	33	314		1	0.144	0.759	0	0.055	0.934	0.475	0.278	0.22	0.617	0.382	0.999	1	0.646	0	0.061	0.001	0.235	0.993	0.995	0.069	1
Clostridiales sp. DTU101	DTU101	1	158	18	190	56	221	68	70	148	110	89	75	5	57	62	37	303	123	67	22	57	595		0.071	0.001	0.958	0.005	0.526	0	0.796	0.014	0.857	0.325	0.991	1	1	0.944	0.979	0.002	0	0.986	0.777	1	0.006	1
Clostridiales sp. DTU071	DTU071	0	97	18	132	46	188	39	43	142	96	87	63	0	48	90	24	170	118	34	18	34	457		1	0.446	0.694	0.192	0.334	0	0.999	0.392	0.055	0.067	0.51	0.999	1	0.85	0	0.076	0.786	0.427	1	0.999	0.344	0.998
Clostridiales sp. DTU113	DTU113	0	46	12	66	29	41	38	13	92	68	51	31	3	53	47	11	116	88	32	18	25	235		1	0.895	0.462	0.704	0.212	0.997	0.206	0.992	0.004	0	0.454	0.999	1	0	0.018	0.446	0.079	0.005	0.525	0.577	0.069	1
Firmicutes sp. DTU114	DTU114	0	104	15	126	38	163	83	31	95	92	88	135	108	84	53	35	294	100	123	120	34	1061		1	1	0.998	1	1	0.499	0.687	1	1	0.998	1	0.288	0	0.369	1	0.057	0.056	1	0	0	0.983	0
Firmicutes sp. DTU115	DTU115	0	142	18	178	56	217	60	58	146	152	82	81	6	60	71	35	290	119	64	24	50	507		1	0.004	0.909	0.005	0.328	0	0.938	0.14	0.678	0	0.992	0.997	1	0.797	0.702	0.002	0	0.983	0.776	0.997	0.042	1
Clostridiales sp. DTU117	DTU117	0	34	6	56	16	68	28	23	67	61	40	25	1	24	33	14	123	41	24	16	22	316		1	0.993	0.951	0.912	0.938	0.099	0.731	0.404	0.501	0.004	0.856	1	1	0.839	0.507	0.098	0.003	0.999	0.914	0.666	0.124	0.001
Erysipelotrichaceae sp. DTU187	DTU187	0	38	12	51	31	53	18	24	74	49	64	39	4	28	52	3	100	61	26	12	24	190		1	0.934	0.274	0.907	0.022	0.518	0.981	0.218	0.047	0.091	0.002	0.721	0.996	0.441	0	0.992	0.1	0.274	0.653	0.884	0.02	1
Firmicutes sp. DTU116	DTU116	0	132	20	139	42	167	41	52	138	102	80	63	4	46	63	24	238	100	63	18	40	511		1	0	0.598	0.222	0.742	0	1	0.104	0.282	0.051	0.921	1	1	0.957	0.623	0.158	0	0.986	0.376	0.999	0.137	0.981
Firmicutes sp. DTU118	DTU118	0	45	9	104	21	67	27	38	65	46	44	34	1	20	29	13	104	61	28	8	12	156		1	0.472	0.546	0	0.445	0.012	0.527	0	0.175	0.115	0.315	0.861	1	0.882	0.507	0.075	0.012	0.191	0.431	0.986	0.81	1
Clostridia sp. DTU122	DTU122	0	119	35	155	55	66	102	23	129	106	99	100	14	68	71	25	180	131	65	36	20	457		1	0.025	0.002	0.005	0.079	1	0	1	0.551	0.012	0.186	0.156	0.988	0.072	0.19	0.102	0.736	0.158	0.251	0.359	0.995	1
Clostridia sp. DTU068	DTU068	0	90	17	124	30	47	88	16	86	70	78	78	40	38	64	23	131	104	54	33	25	370		1	0.087	0.432	0.007	0.848	1	0	1	0.957	0.39	0.21	0.193	0	0.853	0.026	0.022	0.929	0.153	0.126	0.113	0.58	1
Syntrophomonadaceae sp. DTU125	DTU125	0	98	44	163	55	216	68	32	162	110	82	127	70	72	97	26	211	175	74	67	33	426		1	0.953	0	0.095	0.357	0	0.611	0.997	0.142	0.132	0.996	0.011	0	0.216	0.001	0.207	0.672	0	0.264	0	0.821	1
Clostridiales sp. DTU126	DTU126	0	82	18	131	52	69	42	39	103	67	77	49	6	40	59	14	133	78	28	21	16	219		1	0.016	0.119	0	0	0.727	0.337	0.021	0.016	0.056	0.01	0.902	0.999	0.317	0.003	0.338	0.137	0.537	0.963	0.636	0.903	1
Clostridiales sp. DTU128	DTU128	0	84	19	123	49	144	47	34	136	76	77	70	5	37	42	12	161	99	42	19	24	402		1	0.505	0.368	0.066	0.047	0	0.72	0.638	0.005	0.377	0.491	0.778	1	0.951	0.96	0.864	0.399	0.585	0.888	0.978	0.79	0.999
Firmicutes sp. DTU148	DTU148	1	167	23	155	56	93	103	49	123	86	134	136	24	71	96	20	256	184	54	44	40	1205		0.095	0.122	0.955	1	0.967	1	0.121	0.986	1	1	0.687	0.595	0.989	0.965	0.592	0.976	0.977	0.577	1	0.905	0.956	0
Firmicutes sp. DTU243	DTU243	0	84	30	138	42	172	65	28	107	108	80	99	58	55	64	17	173	125	58	44	42	678		1	0.996	0.076	0.635	0.885	0	0.635	1	1	0.079	0.991	0.527	0	0.877	0.794	0.822	0.998	0.747	0.84	0.126	0.166	0
Clostridiales sp. DTU244	DTU244	0	85	20	121	44	152	44	28	136	71	75	70	7	41	35	10	170	101	35	24	25	377		1	0.36	0.232	0.052	0.115	0	0.778	0.923	0.002	0.492	0.478	0.675	1	0.829	0.997	0.947	0.111	0.428	0.99	0.801	0.698	1
Firmicutes sp. DTU245	DTU245	1	176	22	173	69	251	112	64	169	107	132	185	71	104	75	34	358	162	68	124	50	1267		0.111	0.709	0.999	1	0.963	0.001	0.479	0.965	1	1	1	0.052	0	0.527	0.999	0.556	0.25	1	1	0	0.934	0
Firmicutes sp. DTU246	DTU246	0	126	25	135	52	91	51	43	189	97	118	79	6	56	63	20	205	113	60	27	56	466		1	0.007	0.226	0.395	0.216	0.997	0.938	0.602	0	0.159	0.003	0.944	1	0.62	0.669	0.481	0.178	0.841	0.55	0.927	0	1
Clostridiales sp. DTU175	DTU175	0	83	23	138	50	273	41	38	171	105	85	90	8	66	92	12	191	142	50	35	45	607		1	1	0.614	0.851	0.631	0	1	0.967	0.034	0.266	0.99	0.943	1	0.514	0.026	0.997	0.979	0.437	0.993	0.778	0.136	0.795
Firmicutes sp. DTU176	DTU176	0	71	21	125	41	68	36	27	122	83	78	72	36	41	46	19	157	110	52	36	40	331		1	0.829	0.119	0.008	0.206	0.992	0.973	0.907	0.027	0.045	0.226	0.456	0	0.725	0.728	0.164	0.258	0.047	0.254	0.038	0.004	1
Clostridiales sp. DTU177	DTU177	0	101	30	120	48	88	52	33	120	89	71	74	46	44	46	19	152	119	76	33	21	452		1	0.079	0.003	0.275	0.13	0.922	0.637	0.804	0.333	0.083	0.887	0.756	0	0.874	0.939	0.308	0.909	0.117	0.001	0.306	0.953	0.942
Clostridiales sp. DTU178	DTU178	0	95	19	116	32	127	30	30	85	106	81	81	11	39	43	14	225	104	59	21	55	562		1	0.476	0.521	0.688	0.966	0.018	1	0.966	1	0.006	0.722	0.682	0.999	0.989	0.994	0.852	0	0.857	0.358	0.986	0	0.006
Clostridiales sp. DTU179	DTU179	0	68	19	106	52	184	33	46	144	73	78	56	4	47	72	20	179	103	26	11	36	388		1	0.983	0.4	0.711	0.021	0	0.998	0.073	0.002	0.597	0.527	0.994	1	0.604	0.009	0.18	0.083	0.514	1	1	0.081	1
Firmicutes sp. DTU180	DTU180	0	49	13	57	34	98	23	29	114	72	81	47	9	42	54	7	127	78	33	18	33	256		1	0.968	0.506	0.998	0.15	0	1	0.357	0	0.01	0.004	0.921	0.952	0.138	0.023	0.953	0.214	0.399	0.788	0.795	0.009	1
Firmicutes sp. DTU181	DTU181	0	29	6	46	18	50	14	21	61	32	33	23	1	16	22	7	57	35	18	12	5	234		1	0.908	0.735	0.564	0.369	0.102	0.973	0.111	0.02	0.487	0.54	0.973	1	0.891	0.646	0.533	0.942	0.933	0.845	0.564	0.992	0.001
Firmicutes sp. DTU182	DTU182	0	45	11	72	19	99	22	28	75	52	66	38	2	32	45	9	106	54	26	9	18	273		1	0.898	0.557	0.37	0.9	0	0.981	0.163	0.301	0.204	0.01	0.969	1	0.407	0.043	0.686	0.312	0.933	0.895	0.997	0.522	0.882
Clostridia sp. DTU183	DTU183	0	118	30	121	34	79	76	70	130	84	75	70	29	49	39	24	166	114	38	37	18	338		1	0.001	0.002	0.108	0.798	0.974	0.001	0	0.026	0.093	0.59	0.802	0.029	0.466	0.992	0.039	0.3	0.117	0.975	0.084	0.982	1
Firmicutes sp. DTU184	DTU184	0	101	22	121	28	147	83	36	61	75	69	126	42	58	47	31	245	111	105	50	26	1228		1	0.999	0.913	1	1	0.786	0.508	1	1	1	1	0.437	0.046	0.995	1	0.173	0.855	1	0.004	0.303	0.999	0
Clostridiales sp. DTU185	DTU185	0	56	10	62	25	86	36	23	76	51	71	41	2	20	31	10	126	79	27	6	15	349		1	0.645	0.792	0.953	0.676	0.008	0.496	0.717	0.548	0.501	0.008	0.961	1	0.996	0.901	0.668	0.071	0.179	0.939	1	0.895	0.023
Clostridiales sp. DTU188	DTU188	0	187	34	200	79	158	79	62	191	160	170	128	15	74	98	16	279	210	109	28	48	870		1	0	0.395	0.526	0.166	0.954	0.963	0.751	0.827	0.012	0.01	0.871	1	0.957	0.563	0.999	0.851	0.041	0.039	1	0.725	0.137
Firmicutes sp. DTU189	DTU189	0	116	18	156	52	41	77	35	129	50	71	75	6	37	69	18	175	109	46	22	16	247		1	0	0.317	0	0.002	1	0	0.35	0	0.98	0.447	0.234	1	0.866	0.001	0.203	0.002	0.027	0.509	0.799	0.979	1
Lentisphaerae sp. DTU164	DTU164	0	108	21	131	42	171	73	52	137	68	123	157	46	50	43	33	272	113	43	90	44	1198		1	1	0.977	1	0.999	0.374	0.971	0.934	1	1	0.839	0.013	0.025	1	1	0.148	0.605	1	1	0	0.78	0
Planctomycetia sp. DTU247	DTU247	1	235	32	205	58	232	123	89	149	162	145	202	94	138	115	74	494	243	163	153	60	1662		0.124	0.396	0.995	1	1	0.99	0.942	0.881	1	0.999	1	0.744	0	0.289	1	0	0.001	0.999	0.007	0	0.988	0
Gammaproteobacteria sp. DTU037	DTU037	1	192	29	201	61	78	136	136	176	133	142	146	29	123	131	67	272	220	108	69	48	416		0.095	0	0.475	0.045	0.622	1	0	0	0.661	0.118	0.079	0.034	0.759	0	0	0	0.273	0	0.003	0.003	0.38	1
Proteobacteria sp. DTU267	DTU267	1	20	8	32	21	30	16	12	63	36	33	44	9	28	18	5	62	33	20	18	8	325		0.024	1	0.625	1	0.326	0.997	0.979	0.952	0.115	0.519	0.83	0.153	0.628	0.204	0.967	0.906	0.974	0.997	0.874	0.198	0.958	0
Gammaproteobacteria sp. DTU040	DTU040	1	130	31	147	63	53	108	63	152	83	109	114	85	102	98	27	168	131	118	67	24	284		0.052	0.005	0.022	0.084	0.009	1	0	0.003	0.051	0.751	0.042	0.009	0	0	0	0.057	0.976	0.248	0	0	0.978	1
Alcaligenaceae sp. DTU041	DTU041	1	175	30	268	57	89	117	134	156	144	121	155	47	107	168	75	257	238	68	79	36	406		0.088	0	0.408	0	0.798	1	0	0	0.987	0.011	0.735	0.009	0.007	0	0	0	0.686	0	0.978	0	0.946	1
Campylobacterales sp. DTU103	DTU103	0	103	18	134	46	43	82	33	131	64	63	96	71	75	82	12	135	71	121	53	16	326		1	0.015	0.47	0.004	0.119	1	0	0.735	0.01	0.877	0.96	0.012	0	0.001	0	0.859	0.98	1	0	0	0.995	1
Proteobacteria sp. DTU123	DTU123	1	199	25	148	51	93	97	46	110	62	85	118	53	101	83	25	206	122	147	58	31	571		0.065	0	0.457	0.618	0.7	1	0.001	0.768	1	1	0.991	0.146	0	0.001	0.188	0.29	0.911	0.959	0	0.004	0.921	1
Proteobacteria sp. DTU168	DTU168	0	10	15	10	13	22	5	8	83	22	51	62	7	30	8	5	39	29	7	18	8	291		1	1	0.014	1	0.845	1	1	0.991	0	0.979	0.005	0	0.757	0.038	1	0.857	1	0.998	1	0.079	0.937	0
Proteobacteria sp. DTU169	DTU169	0	12	12	13	16	32	10	11	94	36	54	57	16	27	19	2	52	32	26	26	9	370		1	1	0.237	1	0.892	0.997	1	0.995	0	0.753	0.027	0.005	0.076	0.422	0.981	1	1	1	0.61	0.008	0.968	0
Proteobacteria sp. DTU248	DTU248	1	147	26	183	51	57	99	73	159	84	99	103	3	97	127	53	202	156	53	35	19	241		0.078	0	0.113	0	0.202	1	0	0	0.002	0.561	0.178	0.075	1	0	0	0	0.124	0.001	0.789	0.449	0.992	1
Gammaproteobacteria sp. DTU249	DTU249	0	169	33	181	60	67	117	129	161	137	117	144	82	130	130	61	272	207	153	91	36	556		1	0.007	0.292	0.61	0.755	1	0.001	0	0.981	0.105	0.915	0.095	0	0	0	0	0.457	0.005	0	0	0.965	1
Gammaproteobacteria sp. DTU250	DTU250	1	160	33	186	52	64	110	115	142	133	114	128	83	121	119	53	247	203	137	78	36	481		0.084	0.001	0.141	0.099	0.88	1	0.001	0	0.996	0.036	0.716	0.213	0	0	0	0	0.562	0	0	0	0.912	1
Proteobacteria sp. DTU251	DTU251	1	127	32	160	61	92	98	92	186	109	120	139	9	84	82	51	244	156	72	48	33	564		0.07	0.382	0.125	0.476	0.258	1	0.006	0	0.02	0.41	0.25	0.004	1	0.059	0.402	0	0.243	0.3	0.594	0.183	0.907	1
Gammaproteobacteria sp. DTU252	DTU252	1	137	33	146	56	52	99	56	127	91	98	105	86	100	101	22	178	143	122	64	23	309		0.061	0	0.012	0.11	0.088	1	0	0.049	0.7	0.364	0.32	0.099	0	0	0	0.292	0.889	0.037	0	0	0.974	1
Arcobacter sp. DTU253	DTU253	0	6	2	18	8	8	8	13	40	4	5	11	0	6	1	2	7	5	2	4	1	32		1	0.872	0.513	0.04	0.045	0.794	0.164	0	0	0.946	0.904	0.16	1	0.381	0.995	0.496	0.999	0.98	0.973	0.363	0.943	0.999
Burkholderiales sp. DTU254	DTU254	1	116	10	138	44	48	71	96	79	80	56	76	19	46	93	36	192	125	59	37	24	519		0.058	0.017	0.992	0.079	0.48	1	0.04	0	1	0.634	1	0.903	0.825	0.9	0	0	0.17	0.161	0.381	0.211	0.935	0.427
Xanthomonadaceae sp. DTU255	DTU255	0	153	26	173	50	64	113	98	153	130	124	140	26	101	109	57	252	192	118	59	53	631		1	0.037	0.641	0.447	0.94	1	0	0	0.946	0.068	0.412	0.035	0.845	0.004	0.007	0	0.471	0.003	0	0.02	0.089	1
Proteobacteria sp. DTU256	DTU256	1	122	29	143	50	67	110	85	138	96	114	166	35	109	107	52	240	195	116	69	49	614		0.06	0.787	0.336	0.984	0.897	1	0	0	0.997	0.956	0.64	0	0.239	0	0.006	0	0.643	0.001	0	0	0.183	1
Proteobacteria sp. DTU257	DTU257	0	101	33	114	40	89	63	47	137	107	115	109	35	77	61	21	197	109	125	65	25	856		1	0.979	0.06	1	0.989	1	0.901	0.799	0.967	0.411	0.345	0.536	0.125	0.154	0.984	0.673	0.983	1	0	0	0.995	0
Gammaproteobacteria sp. DTU258	DTU258	0	88	24	78	26	51	53	78	76	64	58	86	78	78	65	28	173	118	112	44	18	558		1	0.745	0.176	1	0.999	1	0.71	0	1	0.985	0.999	0.487	0	0	0.266	0.023	0.673	0.329	0	0.018	0.997	0.005
Proteobacteria sp. DTU259	DTU259	1	87	20	142	42	62	70	44	88	65	65	86	0	72	105	35	137	104	33	21	18	185		0.035	0.025	0.101	0	0.051	0.991	0	0.01	0.72	0.349	0.534	0.002	1	0	0	0	0.424	0.017	0.954	0.813	0.899	1
Gammaproteobacteria sp. DTU260	DTU260	1	107	23	143	51	65	92	93	116	102	105	108	33	89	84	42	232	156	71	64	29	559		0.075	0.765	0.563	0.656	0.576	1	0.004	0	0.996	0.348	0.49	0.324	0.129	0.001	0.097	0	0.095	0.06	0.368	0	0.936	0.998
Proteobacteria sp. DTU261	DTU261	0	100	16	90	48	75	60	41	123	85	103	119	20	74	35	24	183	115	74	60	19	755		1	0.813	0.947	1	0.566	1	0.767	0.831	0.948	0.841	0.36	0.021	0.898	0.055	1	0.24	0.949	0.946	0.109	0.001	0.999	0
Proteobacteria sp. DTU174	DTU174	1	25	14	14	16	39	8	5	107	32	60	54	14	36	13	2	59	36	19	25	20	359		0.035	1	0.106	1	0.914	0.992	1	1	0	0.937	0.002	0.037	0.229	0.054	1	1	1	0.999	0.981	0.018	0.156	0
Spirochaeta sp. DTU042	DTU042	0	121	17	172	62	219	59	56	109	109	109	67	2	64	91	22	258	122	61	22	33	559		1	0.219	0.951	0.007	0.078	0	0.905	0.135	1	0.137	0.311	1	1	0.555	0.013	0.488	0	0.928	0.821	1	0.779	0.996
Treponema sp. DTU121	DTU121	0	85	17	121	47	130	63	41	147	106	89	92	57	52	46	8	185	101	158	29	23	640		1	0.989	0.908	0.961	0.662	0.282	0.644	0.819	0.309	0.101	0.86	0.765	0	0.919	0.998	0.999	0.953	1	0	0.937	0.997	0.007
Spirochaetes sp. DTU262	DTU262	0	94	15	122	57	224	38	36	133	100	81	42	0	56	69	11	205	89	52	15	24	477		1	0.562	0.893	0.567	0.026	0	1	0.82	0.227	0.017	0.775	1	1	0.421	0.158	0.987	0.034	0.996	0.786	1	0.926	0.988
Spirochaetes sp. DTU263	DTU263	0	86	12	140	55	158	39	36	129	72	85	39	4	50	59	11	168	82	40	16	16	289		1	0.151	0.87	0	0	0	0.901	0.365	0	0.243	0.039	1	1	0.203	0.089	0.877	0.035	0.926	0.836	0.987	0.985	1
Spirochaetes sp. DTU264	DTU264	0	119	19	179	55	256	56	51	131	107	77	62	5	59	118	29	235	109	73	20	34	453		1	0.119	0.791	0	0.215	0	0.902	0.246	0.824	0.064	0.99	1	1	0.674	0	0.03	0.008	0.981	0.109	0.999	0.64	1
Spirochaetales sp. DTU265	DTU265	0	107	11	149	57	236	45	43	90	113	72	57	2	50	79	14	224	115	72	14	30	437		1	0.183	0.992	0.022	0.042	0	0.988	0.504	0.999	0	0.979	1	1	0.826	0.021	0.887	0.004	0.661	0.034	1	0.694	1
Spirochaetes sp. DTU266	DTU266	0	58	13	87	39	81	35	35	78	58	63	66	37	54	24	13	91	65	83	30	22	536		1	0.989	0.794	0.911	0.248	0.782	0.972	0.361	0.994	0.872	0.822	0.694	0	0.061	1	0.695	1	0.999	0	0.232	0.769	0
Anaerobaculum sp. DTU043	DTU043	0	164	23	245	81	115	125	36	178	98	91	101	51	67	93	18	211	136	52	39	22	425		1	0	0.591	0	0	0.927	0	0.985	0.009	0.55	0.93	0.631	0	0.427	0.013	0.816	0.7	0.612	0.987	0.521	0.999	1
Synergistaceae sp. DTU044	DTU044	0	107	23	169	46	64	60	37	107	47	65	75	7	40	61	8	136	79	22	23	23	239		1	0	0.023	0	0.006	0.975	0.002	0.113	0.04	0.97	0.437	0.057	0.995	0.485	0.01	0.945	0.337	0.739	1	0.588	0.533	1
Synergistaceae sp. DTU045	DTU045	0	126	23	156	52	77	67	42	130	60	61	78	9	37	58	18	157	91	43	29	21	253		1	0	0.052	0	0.002	0.884	0.002	0.062	0	0.789	0.889	0.163	0.994	0.885	0.094	0.181	0.138	0.608	0.657	0.31	0.84	1
Synergistetes sp. DTU119	DTU119	0	160	23	191	55	145	76	38	135	87	67	70	11	64	90	27	217	137	55	27	22	513		1	0	0.474	0	0.212	0.023	0.111	0.925	0.701	0.81	1	1	1	0.417	0.01	0.092	0.2	0.315	0.909	0.97	0.998	1
Synergistaceae sp. DTU120	DTU120	0	127	22	200	61	110	67	35	153	100	77	94	4	57	103	22	199	117	42	25	26	267		1	0	0.261	0	0.005	0.332	0.075	0.778	0.003	0.01	0.832	0.129	1	0.27	0	0.165	0.023	0.297	0.971	0.898	0.81	1
Synergistetes sp. DTU172	DTU172	0	74	16	125	46	41	58	38	101	40	61	79	8	35	31	17	106	73	14	23	22	189		1	0.016	0.161	0	0	1	0	0.007	0	0.941	0.145	0	0.963	0.361	0.879	0.054	0.631	0.363	1	0.233	0.247	1
Synergistetes sp. DTU173	DTU173	1	121	24	153	57	128	59	30	106	77	64	71	55	50	69	16	191	112	82	33	14	379		0.054	0.001	0.143	0.003	0.007	0.009	0.299	0.958	0.921	0.605	0.989	0.925	0	0.606	0.083	0.668	0.061	0.414	0	0.356	1	1
Acholeplasmatales sp. DTU061	DTU061	0	55	14	72	36	93	27	37	126	57	67	48	5	41	46	11	126	88	19	11	38	386		1	0.98	0.613	0.987	0.238	0.065	0.997	0.104	0	0.697	0.362	0.979	0.999	0.454	0.452	0.752	0.727	0.371	1	0.999	0.001	0.341
Acholeplasmatales sp. DTU067	DTU067	0	54	11	61	33	105	26	40	127	62	76	50	7	41	41	13	127	78	24	16	26	372		1	0.973	0.86	0.999	0.428	0	0.996	0.039	0	0.428	0.052	0.964	0.996	0.403	0.74	0.555	0.647	0.793	1	0.955	0.297	0.565
Acholeplasmatales sp. DTU094	DTU094	0	14	16	4	18	22	10	4	106	32	58	37	12	26	9	3	57	43	9	21	16	275		1	1	0.008	1	0.524	1	1	1	0	0.643	0.001	0.414	0.2	0.226	1	0.983	0.981	0.744	1	0.037	0.238	0
Tenericutes sp. DTU186	DTU186	0	11	22	11	15	23	10	6	112	36	62	42	8	26	12	2	53	41	17	23	18	349		1	1	0	1	0.911	1	0.999	1	0	0.709	0.001	0.468	0.83	0.526	1	0.999	1	0.985	0.978	0.049	0.252	0
Tenericutes sp. DTU237	DTU237	0	7	22	11	13	22	9	7	124	33	56	54	12	27	10	2	53	49	13	25	11	245		1	1	0	1	0.918	1	1	0.999	0	0.607	0.001	0.001	0.244	0.206	1	0.996	1	0.496	0.994	0.006	0.781	0.008
Thermotogaceae sp. DTU111	DTU111	0	92	22	156	54	170	47	33	130	80	72	74	61	52	78	17	163	108	52	34	31	401		1	0.534	0.272	0	0.04	0	0.899	0.905	0.189	0.503	0.937	0.881	0	0.554	0.006	0.589	0.843	0.66	0.673	0.364	0.496	1
Verrucomicrobia sp. DTU165	DTU165	0	49	7	68	26	41	32	27	55	35	39	58	17	23	33	6	70	40	65	24	18	417		1	0.855	0.947	0.714	0.472	1	0.66	0.289	0.984	0.988	0.965	0.184	0.152	0.966	0.716	0.961	1	1	0	0.135	0.564	0
Verrucomicrobia sp. DTU166	DTU166	0	92	19	118	42	113	81	44	128	56	68	136	33	67	39	22	175	98	40	70	34	508		1	0.676	0.585	0.73	0.627	0.335	0	0.35	0.396	1	0.988	0	0.016	0.052	1	0.202	0.725	0.965	0.995	0	0.349	0.712
Verrucomicrobia sp. DTU167	DTU167	0	79	14	89	31	86	52	33	81	35	53	82	26	40	35	23	129	73	35	50	19	395		1	0.147	0.591	0.557	0.625	0.254	0.091	0.346	0.883	1	0.947	0.007	0.02	0.517	0.953	0.008	0.654	0.93	0.878	0	0.83	0.187
