# Supplementary material for: Hydrogen-Fueled Microbial Pathways in Biogas Upgrading Systems Revealed by Genome-Centric Metagenomics
Source: Front Microbiol. 2018 May 28;9:1079. doi: 10.3389/fmicb.2018.01079 (PMC5985405; doi:10.3389/fmicb.2018.01079)
Supplement: Supplementary file 7 [file Data_Sheet_7.XLSX]

## Sheet: standard deviations
PG name	PG ID	Completeness	Thermo post/pre H2	Meso post/pre H2	Mean post/pre H2	Pre_H2 thermo/meso	Post_H2 thermo/meso	Mean thermo/meso	1SD Thermo post/pre H2	1SD Meso post/pre H2	1SD Mean post/pre H2	1SD Pre_H2 thermo/meso	1SD Post_H2 thermo/meso	1SD Mean thermo/meso	2SD Thermo post/pre H2	2SD Meso post/pre H2	2SD Mean post/pre H2	2SD Pre_H2 thermo/meso	2SD Post_H2 thermo/meso	2SD Mean thermo/meso	3SD Thermo post/pre H2	3SD Meso post/pre H2	3SD Mean post/pre H2	3SD Pre_H2 thermo/meso	3SD Post_H2 thermo/meso	3SD Mean thermo/meso
Acholeplasmatales sp. DTU067	DTU067	1	-0.449348	0.146387	-0.448809	3.37389	2.77815	3.12558				+	+	+
Clostridia sp. DTU080	DTU080	1	-0.294268	-0.159416	-0.294233	3.65164	3.51679	3.6014				+	+	+				++		++
Syntrophomonadaceae sp. DTU232	DTU232	0.990476	-0.251266	-1.39874	-1.39369	-3.04716	-1.89969	-2.87084		-	-	-	-	-		--	--	--
Firmicutes sp. DTU193	DTU193	0.990476	-0.0286866	-0.133773	-0.121977	-0.951471	-0.846384	-0.903821
Synergistaceae sp. DTU120	DTU120	0.990476	-0.0590216	-0.363399	-0.174976	0.0607698	0.365147	0.17701
Clostridiales sp. DTU069	DTU069	0.990476	-0.423181	0.193064	-0.415896	2.26529	1.64904	1.99615				+		+
Firmicutes sp. DTU245	DTU245	0.980952	0.280365	0.275709	0.275712	-3.22014	-3.21549	-3.21709				-	-	-				--	--	--
Bacteroidetes sp. DTU135	DTU135	0.980952	-0.972144	-0.146444	-0.170168	-1.17613	-2.00183	-1.36608	-				-
Gammaproteobacteria sp. DTU037	DTU037	0.980952	-0.761324	-0.370271	-0.536738	0.0633004	-0.327752	-0.0215236	-
Syntrophothermus sp. DTU052	DTU052	0.980952	0.391763	-0.161602	0.367708	1.09231	1.64568	1.40427	+
Clostridia sp. DTU196	DTU196	0.980952	-0.057653	-0.267363	-0.0600023	1.84504	2.05475	1.9306					+	+
Rikenellaceae sp. DTU001	DTU001	0.980952	-0.908701	-0.616144	-0.907846	2.68752	2.39497	2.64393	-		-	+	+	+
Alcaligenaceae sp. DTU041	DTU041	0.971698	-0.511873	-1.53207	-1.45097	-1.6547	-0.634502	-1.55077		-	-	-		-		--	--
Clostridiales sp. DTU175	DTU175	0.971429	0.737712	0.457964	0.458683	-2.73652	-2.45677	-2.51362	+		+	-	-	-
Clostridiales sp. DTU188	DTU188	0.971429	-0.33403	-0.0784375	-0.0808323	-1.90252	-2.15812	-2.00074				-	-	-
Clostridiale sp. DTU023	DTU023	0.971429	0.113296	-0.122301	0.0366187	0.200568	0.436166	0.31776
Clostridiales sp. DTU075	DTU075	0.971429	-0.0983573	-0.0452005	-0.088025	0.644242	0.591085	0.619854
Clostridia sp. DTU065	DTU065	0.971429	-0.00296966	0.425522	0.0529543	1.05079	0.622299	0.786391
Syntrophomonadaceae sp. DTU190	DTU190	0.971429	0.686387	-0.250817	0.608167	0.640098	1.5773	1.21431	+		+
Clostridiales sp. DTU033	DTU033	0.971429	-1.25454	0.873723	-1.04805	2.33857	0.210309	1.43386	-	+	-	+
Clostridia sp. DTU030	DTU030	0.971429	0.0343414	-0.295634	0.0334512	2.41316	2.74314	2.55381				+	+	+
Tepidanaerobacter sp. DTU063	DTU063	0.971429	-0.701332	-0.696513	-0.701324	2.76441	2.75959	2.76361				+	+	+
Planctomycetia sp. DTU247	DTU247	0.970588	-0.167788	-0.216434	-0.216397	-3.14542	-3.09677	-3.12639				-	-	-				--		--
Bacteroidetes sp. DTU134	DTU134	0.961905	-0.349993	0.605959	0.595883	-1.57722	-2.53318	-2.11894		+	+	-	-	-
Clostridiales sp. DTU268	DTU268	0.961905	0.0440093	0.211046	0.0850589	0.571898	0.40486	0.476241
Clostridiales sp. DTU244	DTU244	0.961905	-0.129975	0.0775711	-0.087922	0.701214	0.493668	0.600555
Erysipelotrichaceae sp. DTU242	DTU242	0.961905	0.177847	-0.318537	0.134935	0.795148	1.29153	1.02381
Clostridiaceae sp. DTU059	DTU059	0.961905	-0.446539	-0.0930157	-0.420163	1.28044	0.926918	1.15622
Clostridiales sp. DTU078	DTU078	0.961905	-0.0337887	0.0853182	-0.0311265	1.70173	1.58263	1.64042
Pelotomaculum sp. DTU098	DTU098	0.961905	-0.918772	-0.128946	-0.914517	2.71892	1.92909	2.52703	-		-	+	+	+
Clostridiales sp. DTU060	DTU060	0.961905	-0.332844	0.0218414	-0.332249	2.96392	2.60924	2.81758				+	+	+
Verrucomicrobia sp. DTU166	DTU166	0.961538	-0.0856053	0.526009	0.522883	-2.01847	-2.63008	-2.39737		+	+	-	-	-
Firmicutes sp. DTU226	DTU226	0.952381	0.987107	0.137785	0.255681	-1.26617	-0.416844	-0.611842	+						++
Clostridia sp. DTU014	DTU014	0.952381	0.256563	0.0213662	0.256422	3.10875	3.34395	3.2449				+	+	+
Clostridiales sp. DTU128	DTU128	0.952381	-0.37832	-0.315728	-0.378299	3.51728	3.45469	3.49786				+	+	+				++
Clostridia sp. DTU183	DTU183	0.952381	0.127996	-0.160713	0.127933	3.52895	3.81766	3.67061				+	+	+				++	++	++
Proteobacteria sp. DTU248	DTU248	0.943396	0.174148	-0.199079	-0.0242797	-0.242519	0.130709	-0.0585426
Campylobacterales sp. DTU103	DTU103	0.942857	-0.825316	0.396224	-0.11772	0.449935	-0.771605	-0.032393	-
Clostridia sp. DTU011	DTU011	0.942857	0.149263	0.173494	0.149574	1.89696	1.87273	1.88262				+	+	+
Clostridia sp. DTU084	DTU084	0.942857	0.068279	0.0683386	0.0682791	2.62863	2.62858	2.6286				+	+	+
Clostridia sp. DTU077	DTU077	0.942857	1.21583	-0.0731041	1.21003	1.84782	3.13675	2.82328	+		+		+	+	++		++
Clostridia sp. DTU025	DTU025	0.942857	0.496903	0.240491	0.496503	2.68449	2.9409	2.86376	+		+	+	+	+
Clostridia sp. DTU122	DTU122	0.942857	0.647958	-0.34169	0.646486	2.42195	3.4116	2.99506	+		+	+	+	+
Acholeplasmatales sp. DTU061	DTU061	0.942308	-0.278252	-0.602863	-0.278414	3.14701	3.47163	3.23408				+	+	+
Euryarchaeota sp. DTU008	DTU008	0.941176	-0.809304	-0.420929	-0.807819	2.62447	2.23609	2.54741	-		-	+	+	+
Bacteroidales sp. DTU136	DTU136	0.933333	-0.549456	0.348656	0.329007	-1.27297	-2.17108	-1.67447					-	-
Bacteroidetes sp. DTU150	DTU150	0.933333	-0.338174	-0.29635	-0.29969	-1.04081	-1.08263	-1.05441
Firmicutes sp. DTU115	DTU115	0.933333	-0.726159	-0.330556	-0.36573	-0.825082	-1.22068	-0.916786
Clostridiales sp. DTU024	DTU024	0.933333	-0.282691	-0.100923	-0.145311	-0.401385	-0.583154	-0.472588
Clostridiales sp. DTU082	DTU082	0.933333	-0.218404	-1.41441	-0.697965	-0.397335	0.79867	-0.208331		-						--
Clostridiales sp. DTU179	DTU179	0.933333	0.787727	0.813422	0.80232	-0.105877	-0.131572	-0.128061	+	+	+
Firmicutes sp. DTU223	DTU223	0.933333	-0.297664	-0.0511044	-0.168464	0.081258	-0.165301	-0.0177548
Peptococcaceae sp. DTU027	DTU027	0.933333	0.0713747	-0.44502	0.0647402	1.65201	2.16841	1.857					+
Clostridiales sp. DTU010	DTU010	0.933333	0.207703	-0.34268	0.20035	1.62105	2.17144	1.87559					+	+
Clostridiales sp. DTU012	DTU012	0.933333	0.135587	0.277293	0.135653	3.40379	3.26208	3.31644				+	+	+
Spirochaetes sp. DTU264	DTU264	0.932692	-0.326124	-0.0294847	-0.052165	-0.940844	-1.23748	-1.05949
Bacteroidetes sp. DTU149	DTU149	0.92381	-0.24726	0.156672	0.0963017	-0.56413	-0.968063	-0.755759
Clostridiales sp. DTU101	DTU101	0.92381	-0.374423	0.0299306	-0.113864	-0.0605011	-0.464855	-0.223776
Propionibacteriaceae sp. DTU132	DTU132	0.92381	0.344738	-0.73515	-0.204257	-0.556334	0.523553	-0.122948		-
Clostridia sp. DTU269	DTU269	0.92381	-0.396355	-1.20262	-0.430264	1.01004	1.81631	1.13021		-
Flavobacteriaceae sp. DTU153	DTU153	0.92381	-1.51306	-0.340789	-1.33363	1.41681	0.244537	1.26669	-		-				--		--
Anaerobaculum sp. DTU043	DTU043	0.92381	-0.327496	-0.432946	-0.327957	2.30588	2.41133	2.33691				+	+	+
Clostridiales sp. DTU093	DTU093	0.92381	0.165408	0.0894512	0.165075	2.31873	2.39468	2.36223				+	+	+
Halothermothrix sp. DTU029	DTU029	0.92381	0.370068	0.100969	0.369737	2.78114	3.05024	2.95104	+			+	+	+
Thermotogaceae sp. DTU111	DTU111	0.923077	-0.434953	-0.237678	-0.434425	2.67397	2.47669	2.61158				+	+	+
Firmicutes sp. DTU240	DTU240	0.914286	-0.302356	-0.470971	-0.394929	-0.170011	-0.00139677	-0.120846
Clostridiales sp. DTU055	DTU055	0.914286	0.225827	0.522478	0.226386	2.88064	2.58399	2.67259		+		+	+	+
Firmicutes sp. DTU221	DTU221	0.914286	0.611419	0.152023	0.611145	3.01381	3.47321	3.33662	+		+	+	+	+
Fibrobacteres sp. DTU171	DTU171	0.91	0.481227	1.47155	1.41301	-0.786646	-1.77697	-1.66748	+	+	+		-	-		++	++
Clostridiales sp. DTU217	DTU217	0.904762	-0.343131	-1.38956	-1.36415	-2.22286	-1.17643	-2.07772		-	-	-		-		--	--
Flavobacteriaceae sp. DTU156	DTU156	0.904762	-0.626736	-0.487593	-0.489722	-1.74087	-1.88001	-1.77113				-	-	-
Firmicutes sp. DTU213	DTU213	0.904762	0.433291	-0.631092	-0.377027	-1.09099	-0.0266068	-0.612638	+
Firmicutes sp. DTU195	DTU195	0.904762	-0.502608	-0.821223	-0.742431	-0.647624	-0.329008	-0.589967		-	-
Clostridiales sp. DTU239	DTU239	0.904762	0.0600568	-0.35763	-0.155564	-0.237582	0.180105	-0.0635183
Eubacteriaceae sp. DTU096	DTU096	0.904762	0.000573944	-0.461691	-0.0329098	0.89366	1.35593	1.06613
Clostridia sp. DTU021	DTU021	0.904762	-0.0234153	-0.317303	-0.0265775	1.82462	2.11851	1.94336					+	+
Proteobacteria sp. DTU174	DTU174	0.904762	1.61819	1.09389	1.61041	1.58485	2.10915	2.08584	+	+	+		+	+	++	++	++				+++
Clostridiales sp. DTU013	DTU013	0.904762	0.271741	-0.0376794	0.271282	2.68236	2.99178	2.85758				+	+	+
Firmicutes sp. DTU176	DTU176	0.904762	0.189468	0.046321	0.18943	3.49725	3.6404	3.57846				+	+	+					++	++
Proteobacteria sp. DTU251	DTU251	0.896226	-0.143326	0.407818	0.322399	-0.480917	-1.03206	-0.79681
Firmicutes sp. DTU246	DTU246	0.895238	-0.0574819	-0.692288	-0.653133	-1.53299	-0.898184	-1.34005				-
Synergistetes sp. DTU119	DTU119	0.895238	-0.0351549	-0.0443501	-0.0424783	-0.597055	-0.58786	-0.592668
Clostridiales sp. DTU074	DTU074	0.895238	-0.333511	-0.443961	-0.333774	2.56868	2.67913	2.60074				+	+	+
Clostridia sp. DTU097	DTU097	0.895238	-0.432568	-0.329001	-0.432464	3.0534	2.94983	3.02294				+	+	+
Acidobacteria sp. DTU170	DTU170	0.886792	0.262621	0.260485	0.26049	-2.56608	-2.56395	-2.5647				-	-	-
Rikenellaceae sp. DTU002	DTU002	0.885714	-0.643876	-0.0740421	-0.0813894	-1.629	-2.19884	-1.80573				-	-	-
Clostridia sp. DTU204	DTU204	0.885714	-0.13396	-0.896505	-0.79546	-1.2375	-0.47496	-1.0502		-	-
Gammaproteobacteria sp. DTU040	DTU040	0.885714	-0.139194	-0.539526	-0.235411	0.307574	0.707905	0.434402
Spirochaetes sp. DTU263	DTU263	0.884615	0.0323575	0.372895	0.356156	-1.12624	-1.46678	-1.33506
Clostridiaceae sp. DTU054	DTU054	0.87619	-0.390772	-0.818016	-0.815402	-2.44149	-2.01424	-2.35477		-	-	-	-	-
Bacteroidetes sp. DTU146	DTU146	0.87619	-0.126389	0.912298	0.901004	-1.53648	-2.57517	-2.2565		+	+	-	-	-
Firmicutes sp. DTU206	DTU206	0.87619	-0.302511	-1.68938	-1.33559	-1.24483	0.142038	-1.07802		-	-					--	--
Clostridiales sp. DTU225	DTU225	0.87619	1.47049	0.708808	0.782493	-1.39503	-0.633342	-0.696444	+	+	+	-			++
Clostridiales sp. DTU228	DTU228	0.87619	-0.249828	-0.0900921	-0.146628	-0.182198	-0.341934	-0.246676
Spirochaetes sp. DTU262	DTU262	0.875	-0.180157	-0.0517726	-0.0580196	-1.22842	-1.3568	-1.2841
Clostridiales sp. DTU099	DTU099	0.866667	-0.362205	-0.229894	-0.2811	-0.133957	-0.266268	-0.178436
Corynebacterium sp. DTU130	DTU130	0.866667	-1.40273	-0.386762	-1.2824	1.45277	0.436804	1.32027	-		-				--
Clostridiales sp. DTU087	DTU087	0.866667	-0.138838	-0.305148	-0.138906	3.30825	3.47456	3.37067				+	+	+
Clostridiales sp. DTU070	DTU070	0.857143	-0.308283	-0.164016	-0.307402	2.28568	2.14141	2.23265				+	+	+
Chloroflexi sp. DTU158	DTU158	0.854369	-0.291423	-0.824382	-0.739268	-1.00599	-0.473028	-0.887305		-	-
Methanoculleus sp. DTU006	DTU006	0.852941	0.0994861	0.283964	0.100493	2.35605	2.17158	2.24385				+	+	+
Proteobacteria sp. DTU261	DTU261	0.847619	-0.593626	-0.588801	-0.588809	-2.75835	-2.76318	-2.75934				-	-	-
Clostridia sp. DTU236	DTU236	0.847619	0.19391	0.783043	0.204729	2.05418	1.46505	1.61361		+		+
Clostridiales sp. DTU230	DTU230	0.838095	0.863495	0.0883792	0.103338	-2.14764	-1.37253	-1.57588	+			-		-
Clostridiales sp. DTU066	DTU066	0.838095	-0.311604	0.225371	-0.288209	1.63494	1.09797	1.37936
Bacteroidetes sp. DTU142	DTU142	0.828571	-0.247117	-0.18908	-0.189634	-1.98665	-2.04469	-2.00854				-	-	-
Firmicutes sp. DTU208	DTU208	0.828571	-0.513121	-0.118018	-0.148432	-0.893906	-1.28901	-1.02371
Clostridiales sp. DTU020	DTU020	0.828571	-0.0524997	0.098963	0.0158707	0.160638	0.00917506	0.0828865
Bacteroidetes sp. DTU144	DTU144	0.819048	-0.301686	-0.357002	-0.356366	-1.96184	-1.90652	-1.94419				-	-	-
Firmicutes sp. DTU116	DTU116	0.819048	-0.308904	0.0937051	0.0101076	-0.389359	-0.791969	-0.566282
Lentisphaerae sp. DTU164	DTU164	0.819048	0.671766	0.407118	0.474225	-0.604521	-0.339873	-0.399564	+		+
Clostridia sp. DTU095	DTU095	0.819048	-0.133929	-0.261189	-0.134235	2.55639	2.68365	2.60581				+	+	+
Tenericutes sp. DTU237	DTU237	0.807692	-1.29258	-0.405336	-1.01767	0.819588	-0.0676585	0.697156	-		-
Bacteroidetes sp. DTU138	DTU138	0.8	-0.584373	0.0505137	-0.0245553	-0.584264	-1.21915	-0.810779
Synergistaceae sp. DTU045	DTU045	0.8	-0.427413	-0.799798	-0.602804	-0.134978	0.237407	-0.0609888		-
Clostridiales sp. DTU211	DTU211	0.8	-0.0843393	0.128216	-0.0172144	0.443642	0.231088	0.334695
Syntrophomonas sp. DTU019	DTU019	0.8	-0.415396	-0.0898196	-0.410603	1.99824	1.67266	1.88101				+		+
Clostridia sp. DTU062	DTU062	0.8	0.596307	0.343564	0.594471	2.01526	2.26801	2.2037	+		+	+	+	+
Acholeplasmatales sp. DTU094	DTU094	0.798077	-0.841017	-1.01526	-0.913116	0.0646643	0.238908	0.0831412	-	-	-
Tenericutes sp. DTU186	DTU186	0.798077	-1.38127	-0.691313	-1.14599	0.645458	-0.0444957	0.582678	-		-				--
Methanosarcina sp. DTU271	DTU271	0.794118	-0.177129	-0.912743	-0.395557	0.0273295	0.762943	0.198673		-
Clostridiales sp. DTU199	DTU199	0.780952	-0.807522	0.189429	0.160114	-1.10645	-2.1034	-1.44957	-				-	-
Bacteroidetes sp. DTU154	DTU154	0.780952	-0.986342	0.630146	0.558075	-0.730912	-2.3474	-1.40984	-	+	+		-
Bacteroidetes sp. DTU157	DTU157	0.771429	-0.256522	0.431276	0.427446	-1.95189	-2.63969	-2.32859				-	-	-
Firmicutes sp. DTU215	DTU215	0.771429	0.401824	0.647398	0.645839	-2.07756	-2.32313	-2.26633	+	+	+	-	-	-
Clostridiales sp. DTU216	DTU216	0.771429	-0.103006	0.773473	0.74751	-1.14433	-2.02081	-1.73285		+	+		-	-
Bacteroidetes sp. DTU152	DTU152	0.761905	-0.786993	0.270601	0.208903	-0.770087	-1.82768	-1.16147	-				-
Clostridiales sp. DTU032	DTU032	0.761905	0.06391	0.454166	0.19329	0.504601	0.114345	0.253802
Chloroflexi sp. DTU162	DTU162	0.757282	1.31119	0.189822	0.43159	-1.18782	-0.0664543	-0.262152	+						++
Gammaproteobacteria sp. DTU250	DTU250	0.752381	-1.52335	-0.493804	-1.04984	0.592514	-0.437031	0.48451	-		-				--
Syntrophomonadaceae sp. DTU125	DTU125	0.752381	-0.00672827	-0.00732547	-0.00672999	2.53934	2.53994	2.53964				+	+	+
Xanthomonadaceae sp. DTU255	DTU255	0.742857	0.772072	0.951064	0.875792	-0.0502231	-0.229216	-0.207472	+	+	+
Clostridiales sp. DTU071	DTU071	0.742857	-0.104832	-0.423486	-0.2694	-0.188229	0.130424	-0.0754413
Proteobacteria sp. DTU257	DTU257	0.733333	0.120545	0.372203	0.370988	-2.19439	-2.44604	-2.35476				-	-	-
Gammaproteobacteria sp. DTU249	DTU249	0.733333	-0.37961	-0.455331	-0.426306	-0.244477	-0.168756	-0.223522
Firmicutes sp. DTU209	DTU209	0.733333	-0.537947	0.760776	-0.307406	1.4146	0.115877	0.694865		+
Clostridiales sp. DTU092	DTU092	0.733333	-0.0674447	-0.0576263	-0.0672518	1.70294	1.69312	1.69838
Clostridiales sp. DTU192	DTU192	0.733333	0.220587	0.145071	0.219921	2.01359	2.0891	2.05917				+	+	+
Treponema sp. DTU121	DTU121	0.730769	0.357911	0.0161351	0.306605	0.589863	0.931638	0.796547
Bacteroidetes sp. DTU137	DTU137	0.72381	0.061062	0.727825	0.725518	-2.16765	-2.83441	-2.63734		+	+	-	-	-
Firmicutes sp. DTU214	DTU214	0.72381	0.0232852	-0.714191	-0.366945	-0.422426	0.315051	-0.186278		-
Clostridiales sp. DTU090	DTU090	0.714286	-0.080245	0.0870709	-0.00777037	0.200828	0.0335119	0.116842
Clostridiales sp. DTU083	DTU083	0.714286	-0.00287103	-0.462075	-0.00347771	2.66886	3.12806	2.83971				+	+	+
Bacteroidetes sp. DTU147	DTU147	0.704762	-0.281659	-0.898287	-0.879211	-1.83791	-1.22128	-1.70695		-	-	-		-
Bacteroidales sp. DTU145	DTU145	0.704762	0.396818	0.526187	0.504856	-0.640963	-0.770332	-0.737065	+	+	+
Firmicutes sp. DTU270	DTU270	0.704762	0.148921	0.410607	0.348844	-0.382751	-0.644438	-0.554062
Microbacteriaceae sp. DTU133	DTU133	0.704762	0.0661516	0.113094	0.0998204	-0.380846	-0.427788	-0.40673
Firmicutes sp. DTU189	DTU189	0.704762	0.0312596	0.256785	0.060568	0.942114	0.716588	0.810924
Clostridiaceae sp. DTU079	DTU079	0.704762	-0.458181	-0.0961956	-0.44399	1.58182	1.21984	1.45599
Chloroflexi sp. DTU159	DTU159	0.699029	-0.569459	-0.437774	-0.440161	-1.66937	-1.80105	-1.70085				-	-	-
Porphyromonadaceae sp. DTU047	DTU047	0.695238	-0.377879	-0.931225	-0.414637	0.8963	1.44965	1.00014		-
Chloroflexi sp. DTU163	DTU163	0.68932	0.177755	1.56914	1.4879	-0.664936	-2.05632	-1.8467		+	+		-	-		++	++
Syntrophomonadaceae sp. DTU218	DTU218	0.685714	1.5019	1.56241	1.55477	-0.810153	-0.87066	-0.868932	+	+	+				++	++	++				+++
Clostridiales sp. DTU100	DTU100	0.67619	-0.547336	-1.07719	-0.862847	-0.437948	0.0919024	-0.364443		-	-
Clostridiales sp. DTU234	DTU234	0.67619	0.187689	-0.00788874	0.186141	2.0041	2.19968	2.11193				+	+	+
Clostridiales sp. DTU231	DTU231	0.666667	-0.188858	-0.311621	-0.256491	-0.1503	-0.0275364	-0.106102
Firmicutes sp. DTU180	DTU180	0.666667	-0.130775	-0.447148	-0.266358	-0.0318479	0.284525	0.0760704
Clostridiales sp. DTU202	DTU202	0.666667	-0.271433	-0.679881	-0.292053	1.08442	1.49287	1.18818
Syntrophomonadaceae sp. DTU220	DTU220	0.657143	0.135262	0.924714	0.805217	-0.394829	-1.18428	-0.99444		+	+
Synergistaceae sp. DTU044	DTU044	0.657143	-0.478203	-0.627565	-0.50855	0.520073	0.669436	0.552814
Clostridia sp. DTU241	DTU241	0.657143	-0.237604	0.364311	-0.145082	1.06556	0.463641	0.743518
Clostridiales sp. DTU177	DTU177	0.657143	-0.0753146	0.5314	-0.0181621	1.31463	0.70791	0.936237		+
Firmicutes sp. DTU219	DTU219	0.647619	-0.643593	-1.09443	-0.956915	-0.590625	-0.139788	-0.535318		-	-
Clostridiales sp. DTU126	DTU126	0.647619	-0.367913	0.323779	0.00139784	0.283742	-0.40795	-0.0537554
Bacteroidales sp. DTU151	DTU151	0.638095	-0.611974	-0.299617	-0.303932	-1.70652	-2.01888	-1.78814				-	-	-
Proteobacteria sp. DTU169	DTU169	0.638095	-0.992587	-1.33924	-1.3311	-1.8034	-1.45675	-1.78078	-	-	-	-		-		--	--
Bacteroidetes sp. DTU139	DTU139	0.638095	-0.345054	0.337588	0.0706052	0.139433	-0.543209	-0.200492
Verrucomicrobia sp. DTU167	DTU167	0.625	-0.0974493	0.146996	0.0714748	-0.229586	-0.474032	-0.355271
Gammaproteobacteria sp. DTU252	DTU252	0.619048	-0.893815	0.215488	-0.410504	0.681775	-0.427527	0.311964	-
Spirochaeta sp. DTU042	DTU042	0.605769	-0.12612	0.318473	0.194167	-0.197071	-0.641663	-0.443365
Clostridiales sp. DTU200	DTU200	0.6	-0.476994	-1.41555	-1.37711	-1.91384	-0.975286	-1.80524		-	-	-		-		--	--
Synergistetes sp. DTU172	DTU172	0.590476	-0.0837387	-0.251679	-0.137361	0.245778	0.413719	0.313782
Clostridiales sp. DTU233	DTU233	0.590476	-0.11848	-0.252243	-0.133281	0.839573	0.973336	0.892421
Proteobacteria sp. DTU256	DTU256	0.580952	-1.22624	0.451604	-0.16285	0.532822	-1.14503	-0.0251841	-
Clostridia sp. DTU022	DTU022	0.580952	0.191745	0.258672	0.220724	0.150648	0.0837214	0.108702
Firmicutes sp. DTU205	DTU205	0.571429	-1.08543	-0.584021	-0.606374	-1.1021	-1.60351	-1.1684	-				-
Synergistetes sp. DTU173	DTU173	0.561905	-0.833818	-0.550596	-0.621045	-0.342292	-0.625513	-0.390576	-
Syntrophomonas sp. DTU018	DTU018	0.561905	-1.56798	-0.317208	-1.48884	1.91971	0.668934	1.76053	-		-	+			--		--
Clostridiales sp. DTU081	DTU081	0.552381	-0.168352	0.448935	0.209666	0.101871	-0.515416	-0.254262
Clostridiales sp. DTU113	DTU113	0.542857	-0.249664	-1.03666	-1.03259	-2.73488	-1.94789	-2.57917		-	-	-	-	-
Porphyromonadaceae sp. DTU003	DTU003	0.542857	-0.342348	-0.565079	-0.495856	-0.45904	-0.236309	-0.400852
Firmicutes sp. DTU224	DTU224	0.52381	-0.273805	-0.720877	-0.719852	-2.88132	-2.43425	-2.77157		-		-	-	-
Proteobacteria sp. DTU123	DTU123	0.52381	-1.3077	-0.636726	-0.671583	-0.963795	-1.63477	-1.03312	-				-
Clostridiales sp. DTU229	DTU229	0.52381	0.0495901	0.198391	0.0894991	0.511311	0.36251	0.426386
Firmicutes sp. DTU182	DTU182	0.52381	-0.482322	-0.535552	-0.496189	0.426597	0.479827	0.43919
Gammaproteobacteria sp. DTU260	DTU260	0.514286	-0.693301	-1.39403	-1.37862	-2.0426	-1.34187	-1.97966		-	-	-		-		--	--
Bacteroidales sp. DTU140	DTU140	0.514286	0.183294	0.309562	0.305752	-1.44534	-1.57161	-1.52589				-	-	-
Erysipelothrix sp. DTU091	DTU091	0.514286	-0.484388	-1.18708	-0.907151	-0.539918	0.162773	-0.444135		-	-
Porphyromonadaceae sp. DTU048	DTU048	0.514286	-0.345724	-0.702847	-0.557292	-0.34324	0.0138826	-0.26008
Erysipelotrichaceae sp. DTU187	DTU187	0.514286	-0.331562	-0.475622	-0.377047	0.264603	0.408663	0.30544
Actinomycetales sp. DTU131	DTU131	0.514286	-1.14703	-0.331375	-0.801625	0.551455	-0.264199	0.415148	-		-
Syntrophomonas sp. DTU017	DTU017	0.495238	0.011502	0.0973205	0.0952259	-1.55952	-1.64534	-1.60512				-	-	-
Clostridiales sp. DTU053	DTU053	0.485714	-0.136803	-0.146631	-0.146537	-2.02017	-2.01034	-2.01605				-	-	-
Bacteroidales sp. DTU141	DTU141	0.47619	0.486599	0.776632	0.733065	-0.613218	-0.903251	-0.847827	+	+	+
Firmicutes sp. DTU114	DTU114	0.47619	-0.0494916	-0.24482	-0.0514637	1.89735	2.09268	1.97869				+	+	+
Spirochaetes sp. DTU266	DTU266	0.471154	0.0952125	1.24617	0.427071	1.01991	-0.131047	0.101016		+						++
Methanothermobacter sp. DTU051	DTU051	0.470588	0.620825	-0.472227	0.617961	2.14255	3.2356	2.73043	+		+	+	+	+
Clostridiales sp. DTU198	DTU198	0.466667	-0.109354	-0.353391	-0.342455	-1.45589	-1.21185	-1.36543				-
Firmicutes sp. DTU222	DTU222	0.457143	0.48672	0.0551739	0.485717	2.43454	2.86608	2.71432	+		+	+	+	+
Firmicutes sp. DTU243	DTU243	0.447619	0.19852	-0.3429	0.194613	1.89521	2.43663	2.14417				+	+	+
Chloroflexi sp. DTU161	DTU161	0.446602	-0.747388	-0.110178	-0.165017	-0.739283	-1.37649	-0.917232
Spirochaetales sp. DTU265	DTU265	0.442308	-0.761636	-0.612528	-0.636201	-0.651067	-0.800174	-0.676558	-
Clostridia sp. DTU068	DTU068	0.438095	0.46558	-0.628808	0.464304	2.49465	3.58904	2.99639	+		+	+	+	+					++
Clostridia sp. DTU210	DTU210	0.438095	-1.28462	0.118129	-1.28055	3.41101	2.00826	3.0689	-		-	+	+	+
Bacteroidales sp. DTU127	DTU127	0.428571	-0.490611	-0.511457	-0.510711	-1.44046	-1.41962	-1.43546				-
Proteobacteria sp. DTU259	DTU259	0.424528	-0.396545	-0.664815	-0.408472	1.20444	1.47271	1.2659
Clostridiales sp. DTU207	DTU207	0.419048	-0.0372757	-0.0670144	-0.0668017	-2.15744	-2.12771	-2.14347				-	-	-
Clostridiales sp. DTU178	DTU178	0.390476	0.126466	-0.764089	-0.458902	-0.751631	0.138924	-0.451765		-
Firmicutes sp. DTU118	DTU118	0.390476	-0.180614	-0.251562	-0.21769	-0.0747541	-0.00380684	-0.0479234
Firmicutes sp. DTU212	DTU212	0.390476	1.06024	0.119099	0.942984	0.438106	1.37925	1.16995	+		+				++
Proteobacteria sp. DTU168	DTU168	0.371429	0.053065	1.97929	1.71511	-0.0675686	-1.99379	-1.72301		+	+		-	-		++	++					+++	+++
Bacteroidetes sp. DTU143	DTU143	0.371429	-0.357628	-0.00158872	-0.163831	0.0997621	-0.256277	-0.0424418
Proteobacteria sp. DTU267	DTU267	0.371429	-0.812065	-0.118679	-0.765394	1.52756	0.834176	1.34409	-		-
Firmicutes sp. DTU201	DTU201	0.361905	-0.339578	-0.387819	-0.387491	-2.18931	-2.14107	-2.17473				-	-	-
Bacteroidetes sp. DTU155	DTU155	0.361905	-0.296846	0.633242	0.431908	-0.139545	-1.06963	-0.686147		+
Arcobacter sp. DTU253	DTU253	0.361905	-0.794903	-0.477541	-0.732351	0.774491	0.457129	0.71425	-
Firmicutes sp. DTU194	DTU194	0.352381	-0.706832	0.00981373	-0.534674	0.883623	0.166978	0.65554
Clostridiales sp. DTU089	DTU089	0.352381	-1.33983	-0.31727	-1.0881	1.04681	0.0242585	0.895488	-		-				--
Clostridia sp. DTU191	DTU191	0.352381	0.20546	-0.00522899	0.184168	0.847197	1.05789	0.964572
Firmicutes sp. DTU181	DTU181	0.352381	-1.24118	0.595407	-1.02782	2.02374	0.187152	1.35432	-	+	-	+
Clostridiales sp. DTU185	DTU185	0.342857	0.378335	-0.0540226	0.187815	-0.110476	0.321882	0.144821	+
Erysipelothrix sp. DTU227	DTU227	0.342857	-0.322002	-0.59857	-0.354128	0.74866	1.02523	0.820263
Clostridiales sp. DTU235	DTU235	0.342857	-0.348682	-0.789105	-0.387471	0.810136	1.25056	0.905518		-
Firmicutes sp. DTU148	DTU148	0.333333	-0.0198765	0.783384	0.771632	-1.48523	-2.28849	-2.04361		+	+	-	-	-
Clostridiales sp. DTU203	DTU203	0.333333	-0.352428	-1.15889	-1.07919	-1.41213	-0.605675	-1.28163		-	-	-
Clostridia sp. DTU197	DTU197	0.333333	-0.27263	-0.162233	-0.272107	2.37909	2.26869	2.33741				+	+	+
Chloroflexi sp. DTU160	DTU160	0.320388	-0.19024	0.259949	0.187397	-0.504426	-0.954614	-0.738351
Firmicutes sp. DTU124	DTU124	0.314286	0.0119539	0.120862	0.119796	-1.95197	-2.06087	-2.01057				-	-	-
Firmicutes sp. DTU238	DTU238	0.314286	-0.0818845	-0.606601	-0.141868	0.646997	1.17171	0.813007
Firmicutes sp. DTU184	DTU184	0.295238	-0.0258345	0.181274	-0.00754951	1.1209	0.913789	1.00814
Methanoculleus sp. DTU007	DTU007	0.294118	-1.96807	0.478186	-0.841466	1.33206	-1.1142	0.733848	-	+	-				--						---
Clostridiales sp. DTU117	DTU117	0.285714	-0.14719	0.50021	0.208676	0.233144	-0.414256	-0.152706		+
Verrucomicrobia sp. DTU165	DTU165	0.269231	-0.102318	0.546055	0.267913	0.194305	-0.454068	-0.207577		+
Gammaproteobacteria sp. DTU258	DTU258	0.266667	-2.47328	-2.15109	-2.35052	0.374182	0.0519931	0.372584	-	-	-				--	--	--				---	---	---
Burkholderiales sp. DTU254	DTU254	0.264151	0.294753	-0.0637045	-0.022652	-1.07696	-0.718507	-0.874362

## Sheet: reg KEGG
Comparison	KEGG category	ProbF	estimate
Thermo post/pre H2	Two-component system	0.0219632	-0.0146442
Thermo post/pre H2	Alanine, aspartate and glutamate metabolism	0.022089	-0.0341676
Thermo post/pre H2	Flagellar assembly	0.0531473	-0.0147907
Meso post/pre H2	Valine, leucine and isoleucine degradation	0.00344611	-0.0570065
Meso post/pre H2	Degradation of aromatic compounds	0.0106935	-0.0747316
Meso post/pre H2	Sulfur metabolism	0.0137981	-0.0641496
Meso post/pre H2	Phosphotransferase system	0.015701	-0.0669465
Meso post/pre H2	Glutathione metabolism	0.0204582	-0.091984
Meso post/pre H2	beta-Lactam resistance	0.0233444	-0.0525333
Meso post/pre H2	Biosynthesis of unsaturated fatty acids	0.0264843	-0.128082
Meso post/pre H2	Microbial metabolism in diverse environments	0.0267441	-0.00788049
Meso post/pre H2	Glycerophospholipid metabolism	0.0283073	-0.0634677
Meso post/pre H2	Tryptophan metabolism	0.0339452	-0.0725159
Meso post/pre H2	ABC transporters	0.0361587	-0.00862623
Meso post/pre H2	Pentose phosphate pathway	0.0462626	-0.0354827
Meso post/pre H2	Ribosome biogenesis in eukaryotes	0.0494841	-0.278683
Meso post/pre H2	Glycerolipid metabolism	0.0583288	-0.0566104
Mean post/pre H2	Sulfur metabolism	0.00423832	-0.0743583
Mean post/pre H2	Valine, leucine and isoleucine degradation	0.00440957	-0.0555465
Mean post/pre H2	Polyketide sugar unit biosynthesis	0.0384832	0.118694
Mean post/pre H2	Two-component system	0.0407681	-0.0143146
Mean post/pre H2	Glycerophospholipid metabolism	0.0420304	-0.0589138
Mean post/pre H2	Tryptophan metabolism	0.0511195	-0.0667756
Mean post/pre H2	Nitrogen metabolism	0.0561944	-0.0523652
Mean post/pre H2	Degradation of aromatic compounds	0.0579622	-0.0557153
Pre_H2 thermo/meso	Flagellar assembly	5.38045e-08	0.115323
Pre_H2 thermo/meso	Bacterial chemotaxis	3.46398e-05	0.104805
Pre_H2 thermo/meso	Drug metabolism - other enzymes	0.000185547	-0.441285
Pre_H2 thermo/meso	RNA degradation	0.000208933	-0.247465
Pre_H2 thermo/meso	Starch and sucrose metabolism	0.000330965	-0.13111
Pre_H2 thermo/meso	Streptomycin biosynthesis	0.00113886	-0.346988
Pre_H2 thermo/meso	Ascorbate and aldarate metabolism	0.00391061	-0.532524
Pre_H2 thermo/meso	Polyketide sugar unit biosynthesis	0.00902683	-0.389653
Pre_H2 thermo/meso	PPAR signaling pathway	0.0111646	-0.194444
Pre_H2 thermo/meso	Aminoacyl-tRNA biosynthesis	0.0135868	-0.112381
Pre_H2 thermo/meso	Lysine degradation	0.0145731	-0.166914
Pre_H2 thermo/meso	ABC transporters	0.0155285	-0.025968
Pre_H2 thermo/meso	Glycerophospholipid metabolism	0.0160447	-0.181732
Pre_H2 thermo/meso	Adipocytokine signaling pathway	0.0283465	-0.195634
Pre_H2 thermo/meso	Nitrotoluene degradation	0.0331407	0.174345
Pre_H2 thermo/meso	Ribosome	0.0332928	-0.0666716
Pre_H2 thermo/meso	Bacterial secretion system	0.041642	-0.127617
Pre_H2 thermo/meso	Tryptophan metabolism	0.0509541	-0.174379
Pre_H2 thermo/meso	Amino sugar and nucleotide sugar metabolism	0.0511342	-0.0648331
Pre_H2 thermo/meso	Galactose metabolism	0.0515631	-0.083968
Pre_H2 thermo/meso	DNA replication	0.0564036	-0.151296
Post_H2 thermo/meso	Flagellar assembly	6.56182e-07	0.105631
Post_H2 thermo/meso	Drug metabolism - other enzymes	9.02426e-05	-0.459767
Post_H2 thermo/meso	Bacterial chemotaxis	0.000190139	0.0944303
Post_H2 thermo/meso	Starch and sucrose metabolism	0.00331225	-0.10737
Post_H2 thermo/meso	RNA degradation	0.00398981	-0.192568
Post_H2 thermo/meso	Streptomycin biosynthesis	0.00572803	-0.294482
Post_H2 thermo/meso	Aminoacyl-tRNA biosynthesis	0.00777812	-0.120594
Post_H2 thermo/meso	Ribosome	0.0115174	-0.078672
Post_H2 thermo/meso	Polyketide sugar unit biosynthesis	0.0125274	-0.371432
Post_H2 thermo/meso	PPAR signaling pathway	0.0131332	-0.189377
Post_H2 thermo/meso	Nitrotoluene degradation	0.0152362	0.197534
Post_H2 thermo/meso	Ascorbate and aldarate metabolism	0.0180292	-0.43615
Post_H2 thermo/meso	Adipocytokine signaling pathway	0.0210449	-0.204959
Post_H2 thermo/meso	Peptidoglycan biosynthesis	0.0211306	0.114351
Post_H2 thermo/meso	Riboflavin metabolism	0.0433472	0.26235
Post_H2 thermo/meso	Glycerophospholipid metabolism	0.0492657	-0.148151
Mean thermo/meso	Flagellar assembly	1.35412e-07	0.112322
Mean thermo/meso	Drug metabolism - other enzymes	7.03068e-05	-0.469676
Mean thermo/meso	Bacterial chemotaxis	7.06832e-05	0.101024
Mean thermo/meso	Starch and sucrose metabolism	0.000687027	-0.124526
Mean thermo/meso	RNA degradation	0.000869601	-0.223508
Mean thermo/meso	Streptomycin biosynthesis	0.00312258	-0.316718
Mean thermo/meso	Ascorbate and aldarate metabolism	0.00435251	-0.52788
Mean thermo/meso	Aminoacyl-tRNA biosynthesis	0.00726037	-0.12244
Mean thermo/meso	Polyketide sugar unit biosynthesis	0.010865	-0.381317
Mean thermo/meso	Ribosome	0.011976	-0.0787752
Mean thermo/meso	PPAR signaling pathway	0.0187593	-0.180793
Mean thermo/meso	Glycerophospholipid metabolism	0.0245205	-0.170353
Mean thermo/meso	Nitrotoluene degradation	0.0271568	0.181244
Mean thermo/meso	Peptidoglycan biosynthesis	0.027531	0.110096
Mean thermo/meso	ABC transporters	0.0325352	-0.0230395
Mean thermo/meso	Adipocytokine signaling pathway	0.0353436	-0.188389
Mean thermo/meso	Lysine degradation	0.0420095	-0.139621
Mean thermo/meso	Galactose metabolism	0.0504728	-0.0845994
Mean thermo/meso	Bacterial secretion system	0.0554163	-0.120412
Mean thermo/meso	Amino sugar and nucleotide sugar metabolism	0.0555755	-0.0638267

## Sheet: reg SEED
Comparison	SEED category	ProbF	estimate
Thermo post/pre H2	Putative Isoquinoline 1-oxidoreductase subunit	0.00146546	-1.81015
Thermo post/pre H2	Probably Pyrimidine biosynthesis-related	0.00320731	-0.411446
Thermo post/pre H2	Hypothetical Related to Dihydroorate Dehydrogenase	0.00534545	-0.860693
Thermo post/pre H2	Nitrogen Metabolism	0.00754842	-0.0340648
Thermo post/pre H2	Organic sulfur assimilation	0.00757284	-0.119107
Thermo post/pre H2	Phospholipids	0.0111685	-0.0482132
Thermo post/pre H2	Potassium metabolism	0.0126942	-0.0925666
Thermo post/pre H2	Hypothetical lipase related to Phosphatidate metabolism	0.0136439	-0.207117
Thermo post/pre H2	recX and regulatory cluster	0.0138667	-0.240317
Thermo post/pre H2	Coenzyme M	0.0142907	0.514193
Thermo post/pre H2	Lysine Biosynthesis	0.0155315	-0.648015
Thermo post/pre H2	Flagellar motility in Prokaryota	0.0223002	-0.011883
Thermo post/pre H2	Two related proteases	0.0272093	-0.112894
Thermo post/pre H2	Motility and Chemotaxis	0.0274449	-0.00957577
Thermo post/pre H2	D-tyrosyl-tRNA(Tyr) deacylase (EC 3.1.-.-) cluster	0.0336853	-0.42383
Thermo post/pre H2	RNA processing and modification	0.0374168	-0.0144816
Thermo post/pre H2	Glutamine, glutamate, aspartate, asparagine; ammonia assimilation	0.0378668	-0.044102
Thermo post/pre H2	Central carbohydrate metabolism	0.0395244	-0.0144888
Thermo post/pre H2	Protein folding	0.0412736	-0.0559987
Thermo post/pre H2	Triacylglycerols	0.041564	-0.510394
Thermo post/pre H2	Flagella protein?	0.0478958	-0.2621
Thermo post/pre H2	Protein secretion system, Type VI	0.0479348	-0.0950755
Thermo post/pre H2	RNA Metabolism	0.0489649	-0.0104277
Thermo post/pre H2	Stress Response	0.0506148	-0.0116142
Thermo post/pre H2	Virulence, Disease and Defense	0.0520961	-0.0149978
Meso post/pre H2	Metabolism of central aromatic intermediates	0.00100321	-0.0830006
Meso post/pre H2	Putative Isoquinoline 1-oxidoreductase subunit	0.00139583	-1.98674
Meso post/pre H2	Phospholipids	0.0023952	-0.0628528
Meso post/pre H2	Osmotic stress	0.00250555	-0.0822676
Meso post/pre H2	D-tyrosyl-tRNA(Tyr) deacylase (EC 3.1.-.-) cluster	0.00261512	-0.653042
Meso post/pre H2	Invasion and intracellular resistance	0.00372213	-0.145518
Meso post/pre H2	Potassium metabolism	0.0119981	-0.101959
Meso post/pre H2	Cell wall of Mycobacteria	0.0129311	-0.075487
Meso post/pre H2	Metabolism of Aromatic Compounds	0.0149419	-0.0230559
Meso post/pre H2	Fatty acid metabolic cluster	0.0167695	-0.0865017
Meso post/pre H2	Hypothetical lipase related to Phosphatidate metabolism	0.0174776	-0.218191
Meso post/pre H2	Biosynthesis of galactoglycans and related lipopolysacharides	0.0187936	0.0514487
Meso post/pre H2	Cytochrome biogenesis	0.0188046	-0.0824673
Meso post/pre H2	Central carbohydrate metabolism	0.0211112	-0.0177145
Meso post/pre H2	Siderophores	0.0280376	-0.226688
Meso post/pre H2	Stress Response	0.0284164	-0.014214
Meso post/pre H2	Purines	0.031771	-0.0319816
Meso post/pre H2	Protein secretion system, Type VI	0.0333484	-0.1117
Meso post/pre H2	Plasmid related functions	0.0342429	-0.321147
Meso post/pre H2	recX and regulatory cluster	0.0420111	-0.217489
Meso post/pre H2	Cold shock	0.0446013	-0.188691
Meso post/pre H2	ATP synthases	0.0490062	0.0443274
Meso post/pre H2	Riboflavin, FMN, FAD	0.0498816	-0.16757
Meso post/pre H2	Coenzyme B	0.0528657	-1.5499
Meso post/pre H2	Type III, Type IV, Type VI, ESAT secretion systems	0.0533259	-0.18166
Meso post/pre H2	Dormancy and Sporulation	0.054665	0.0105208
Mean post/pre H2	Hypothetical lipase related to Phosphatidate metabolism	0.000398765	-0.322747
Mean post/pre H2	D-tyrosyl-tRNA(Tyr) deacylase (EC 3.1.-.-) cluster	0.000555432	-0.747062
Mean post/pre H2	Invasion and intracellular resistance	0.00108986	-0.16351
Mean post/pre H2	Putative Isoquinoline 1-oxidoreductase subunit	0.00143071	-1.98328
Mean post/pre H2	Potassium metabolism	0.00256798	-0.122048
Mean post/pre H2	Organic sulfur assimilation	0.00267919	-0.146093
Mean post/pre H2	Phospholipids	0.00284649	-0.0618164
Mean post/pre H2	Protein secretion system, Type VI	0.00619498	-0.143277
Mean post/pre H2	Probably Pyrimidine biosynthesis-related	0.00769341	-0.407531
Mean post/pre H2	Central carbohydrate metabolism	0.0087868	-0.0201025
Mean post/pre H2	Nitrogen Metabolism	0.00934352	-0.0362496
Mean post/pre H2	Cell wall of Mycobacteria	0.00957511	-0.0786678
Mean post/pre H2	Metabolism of central aromatic intermediates	0.0113447	-0.0642261
Mean post/pre H2	Stress Response	0.0126338	-0.0161571
Mean post/pre H2	recX and regulatory cluster	0.0137431	-0.263079
Mean post/pre H2	Fatty acid metabolic cluster	0.0174484	-0.086018
Mean post/pre H2	Triacylglycerols	0.0239394	-0.617672
Mean post/pre H2	Two related proteases	0.0264831	-0.124011
Mean post/pre H2	Oxidative stress	0.0291052	-0.0371403
Mean post/pre H2	Purines	0.0306047	-0.0322153
Mean post/pre H2	Sulfur Metabolism	0.0311083	-0.0245827
Mean post/pre H2	RNA processing and modification	0.0320926	-0.0163003
Mean post/pre H2	Osmotic stress	0.0338863	-0.058064
Mean post/pre H2	Coenzyme M	0.0340575	0.48716
Mean post/pre H2	Siderophores	0.0341131	-0.218815
Mean post/pre H2	Metabolism of Aromatic Compounds	0.0354756	-0.0199635
Mean post/pre H2	Plasmid related functions	0.0371938	-0.316244
Mean post/pre H2	Branched-chain amino acids	0.0384332	-0.020126
Mean post/pre H2	Phosphorus Metabolism	0.0390824	-0.0314507
Mean post/pre H2	Cytochrome biogenesis	0.0437229	-0.0709373
Mean post/pre H2	Glutamine, glutamate, aspartate, asparagine; ammonia assimilation	0.0444578	-0.0466861
Mean post/pre H2	Nucleosides and Nucleotides	0.0550347	-0.0161305
Mean post/pre H2	Virulence, Disease and Defense	0.0564495	-0.016106
Mean post/pre H2	DNA replication	0.0574302	-0.0291693
Mean post/pre H2	Fatty Acids, Lipids, and Isoprenoids	0.0579881	-0.0120894
Mean post/pre H2	Electron accepting reactions	0.059035	-0.0295968
Pre_H2 thermo/meso	Dormancy and Sporulation	8.20377e-08	0.0745505
Pre_H2 thermo/meso	Potassium metabolism	3.63836e-06	-0.482501
Pre_H2 thermo/meso	Phosphorus Metabolism	5.69032e-06	-0.17724
Pre_H2 thermo/meso	Spore DNA protection	1.51706e-05	0.657711
Pre_H2 thermo/meso	Flagellar motility in Prokaryota	4.15185e-05	0.0600302
Pre_H2 thermo/meso	Hypothetical lipase related to Phosphatidate metabolism	6.73788e-05	-0.944432
Pre_H2 thermo/meso	Motility and Chemotaxis	7.62425e-05	0.0484257
Pre_H2 thermo/meso	Protein processing and modification	0.000140938	-0.248273
Pre_H2 thermo/meso	Coenzyme M	0.000183546	2.2201
Pre_H2 thermo/meso	Biotin	0.000437681	-0.276937
Pre_H2 thermo/meso	Biosynthesis of phenylpropanoids	0.000622331	-1.3294
Pre_H2 thermo/meso	DNA replication	0.000974327	-0.131051
Pre_H2 thermo/meso	Polysaccharides	0.00120853	-0.235745
Pre_H2 thermo/meso	Gram-Positive cell wall components	0.00153579	-0.355517
Pre_H2 thermo/meso	Capsular and extracellular polysacchrides	0.00157664	-0.0839432
Pre_H2 thermo/meso	Osmotic stress	0.00306604	-0.210485
Pre_H2 thermo/meso	DNA metabolism	0.005211	-0.0437836
Pre_H2 thermo/meso	Phage family-specific subsystems	0.00552387	0.824035
Pre_H2 thermo/meso	Protein folding	0.00662209	-0.211813
Pre_H2 thermo/meso	Di- and oligosaccharides	0.00774188	-0.0586867
Pre_H2 thermo/meso	Protein Metabolism	0.00925874	-0.0251756
Pre_H2 thermo/meso	Protein biosynthesis	0.00956863	-0.0354265
Pre_H2 thermo/meso	Ribosome-related cluster	0.0110147	-0.490369
Pre_H2 thermo/meso	Selenoproteins	0.0160649	-0.232348
Pre_H2 thermo/meso	Tetrapyrroles	0.0161203	-0.0800371
Pre_H2 thermo/meso	Sulfatases and sulfatase modifying factor 1 (and a hypothetical)	0.0164642	-0.19428
Pre_H2 thermo/meso	Detoxification	0.0175056	-0.228375
Pre_H2 thermo/meso	Resistance to antibiotics and toxic compounds	0.0177815	-0.0725124
Pre_H2 thermo/meso	Adhesion	0.0183189	-0.639026
Pre_H2 thermo/meso	Membrane-bound hydrogenase	0.0195536	-0.38576
Pre_H2 thermo/meso	Bacteriocins, ribosomally synthesized antibacterial peptides	0.0201421	0.567932
Pre_H2 thermo/meso	DNA repair	0.0208817	-0.067819
Pre_H2 thermo/meso	Flagella protein?	0.0209688	0.871248
Pre_H2 thermo/meso	Heat shock	0.0269316	-0.156543
Pre_H2 thermo/meso	Phages, Prophages	0.0290163	-0.346023
Pre_H2 thermo/meso	Stress Response	0.029123	-0.0369469
Pre_H2 thermo/meso	Glutamine, glutamate, aspartate, asparagine; ammonia assimilation	0.0295083	-0.131844
Pre_H2 thermo/meso	Hypothetical associated with RecF	0.0299029	0.788548
Pre_H2 thermo/meso	Phospholipids	0.0326658	-0.116049
Pre_H2 thermo/meso	Nucleotidyl-phosphate metabolic cluster	0.0331144	-0.475198
Pre_H2 thermo/meso	Fatty Acids, Lipids, and Isoprenoids	0.0350512	-0.0350424
Pre_H2 thermo/meso	DNA recombination	0.0369059	-0.428452
Pre_H2 thermo/meso	Electron donating reactions	0.0392107	-0.049539
Pre_H2 thermo/meso	Putative asociate of RNA polymerase sigma-54 factor rpoN	0.0413102	-0.234043
Pre_H2 thermo/meso	Protein secretion system, Type VI	0.0431612	-0.277265
Pre_H2 thermo/meso	Carbohydrates	0.047345	-0.00945515
Pre_H2 thermo/meso	Carotenoid biosynthesis	0.0477626	-0.860373
Pre_H2 thermo/meso	Probably Ybbk-related hypothetical membrane proteins	0.0494419	-0.493854
Pre_H2 thermo/meso	Peripheral pathways for catabolism of aromatic compounds	0.0495173	-0.0765602
Pre_H2 thermo/meso	RNA processing and modification	0.052143	-0.0385773
Pre_H2 thermo/meso	Arginine; urea cycle, polyamines	0.055616	-0.0789203
Pre_H2 thermo/meso	Purines	0.0557591	-0.0744615
Pre_H2 thermo/meso	Phages, Prophages, Transposable elements	0.0559759	-0.287785
Pre_H2 thermo/meso	Fatty acid metabolic cluster	0.0561628	-0.180744
Post_H2 thermo/meso	Dormancy and Sporulation	2.45242e-06	0.0657277
Post_H2 thermo/meso	Potassium metabolism	5.24066e-06	-0.473109
Post_H2 thermo/meso	Coenzyme M	5.92299e-06	2.65841
Post_H2 thermo/meso	Protein processing and modification	1.13648e-05	-0.283683
Post_H2 thermo/meso	Phosphorus Metabolism	1.18681e-05	-0.170691
Post_H2 thermo/meso	Hypothetical lipase related to Phosphatidate metabolism	7.72717e-05	-0.933358
Post_H2 thermo/meso	Spore DNA protection	0.000106674	0.589246
Post_H2 thermo/meso	Biotin	0.00035076	-0.28032
Post_H2 thermo/meso	Protein biosynthesis	0.000403342	-0.0478752
Post_H2 thermo/meso	Protein Metabolism	0.000584714	-0.0329514
Post_H2 thermo/meso	Protein folding	0.000617897	-0.264755
Post_H2 thermo/meso	Flagellar motility in Prokaryota	0.000620668	0.0502136
Post_H2 thermo/meso	Capsular and extracellular polysacchrides	0.000681887	-0.0897244
Post_H2 thermo/meso	DNA replication	0.000808952	-0.132549
Post_H2 thermo/meso	Gram-Positive cell wall components	0.00105293	-0.365955
Post_H2 thermo/meso	Motility and Chemotaxis	0.00119214	0.0397455
Post_H2 thermo/meso	DNA metabolism	0.00334318	-0.0457688
Post_H2 thermo/meso	Polysaccharides	0.00397934	-0.209442
Post_H2 thermo/meso	Ribosome-related cluster	0.00516379	-0.536549
Post_H2 thermo/meso	Resistance to antibiotics and toxic compounds	0.00674081	-0.0824133
Post_H2 thermo/meso	DNA repair	0.00948718	-0.0757413
Post_H2 thermo/meso	Di- and oligosaccharides	0.00992236	-0.0566317
Post_H2 thermo/meso	Tetrapyrroles	0.0114313	-0.0837493
Post_H2 thermo/meso	CRISPRs and associated hypotheticals	0.0124861	-0.725347
Post_H2 thermo/meso	Adhesion	0.0130646	-0.669281
Post_H2 thermo/meso	Phage family-specific subsystems	0.0153098	0.718838
Post_H2 thermo/meso	Glutamine, glutamate, aspartate, asparagine; ammonia assimilation	0.0184591	-0.142047
Post_H2 thermo/meso	Selenoproteins	0.0185972	-0.226334
Post_H2 thermo/meso	Heat shock	0.019352	-0.164727
Post_H2 thermo/meso	Biosynthesis of phenylpropanoids	0.0197879	-0.908251
Post_H2 thermo/meso	Probably Ybbk-related hypothetical membrane proteins	0.0223706	-0.571022
Post_H2 thermo/meso	Membrane-bound hydrogenase	0.0268967	-0.364456
Post_H2 thermo/meso	Putative asociate of RNA polymerase sigma-54 factor rpoN	0.0272212	-0.252129
Post_H2 thermo/meso	Phages, Prophages	0.0311053	-0.340388
Post_H2 thermo/meso	Osmotic stress	0.0324786	-0.15214
Post_H2 thermo/meso	Two related proteases	0.0347056	-0.306946
Post_H2 thermo/meso	Sulfatases and sulfatase modifying factor 1 (and a hypothetical)	0.0347354	-0.170618
Post_H2 thermo/meso	Detoxification	0.0347989	-0.20237
Post_H2 thermo/meso	RNA processing and modification	0.0358184	-0.0415067
Post_H2 thermo/meso	Biosynthesis of galactoglycans and related lipopolysacharides	0.040729	-0.116702
Post_H2 thermo/meso	Electron donating reactions	0.0413024	-0.0488388
Post_H2 thermo/meso	Stress Response	0.0418796	-0.0343471
Post_H2 thermo/meso	Hypothetical associated with RecF	0.0423514	0.734876
Post_H2 thermo/meso	Fatty Acids, Lipids, and Isoprenoids	0.0503452	-0.0324331
Post_H2 thermo/meso	Arginine; urea cycle, polyamines	0.0514999	-0.079971
Post_H2 thermo/meso	Hypothetical Related to Dihydroorate Dehydrogenase	0.0518273	-1.71534
Post_H2 thermo/meso	Protein secretion system, Type VI	0.0564837	-0.260641
Post_H2 thermo/meso	Carbohydrates	0.05686	-0.00904754
Mean thermo/meso	Coenzyme M	2.46377e-05	2.49999
Mean thermo/meso	Flagella protein?	0.0301168	0.82131
Mean thermo/meso	Phage family-specific subsystems	0.0070528	0.80281
Mean thermo/meso	Hypothetical associated with RecF	0.0319555	0.781267
Mean thermo/meso	Spore DNA protection	2.0614e-05	0.64962
Mean thermo/meso	Bacteriocins, ribosomally synthesized antibacterial peptides	0.0186646	0.576435
Mean thermo/meso	Dormancy and Sporulation	2.44478e-07	0.0721312
Mean thermo/meso	Flagellar motility in Prokaryota	0.00011403	0.0567924
Mean thermo/meso	Motility and Chemotaxis	0.000222244	0.0454284
Mean thermo/meso	Carbohydrates	0.0518301	-0.00929871
Mean thermo/meso	Protein Metabolism	0.00332257	-0.0284271
Mean thermo/meso	Fatty Acids, Lipids, and Isoprenoids	0.0531143	-0.0322698
Mean thermo/meso	Stress Response	0.0464117	-0.033852
Mean thermo/meso	RNA processing and modification	0.0579407	-0.0377816
Mean thermo/meso	Protein biosynthesis	0.0028081	-0.0408686
Mean thermo/meso	DNA metabolism	0.003294	-0.0461467
Mean thermo/meso	Electron donating reactions	0.0452637	-0.0482524
Mean thermo/meso	Di- and oligosaccharides	0.00786732	-0.0587354
Mean thermo/meso	DNA repair	0.0135805	-0.0726032
Mean thermo/meso	Resistance to antibiotics and toxic compounds	0.0147326	-0.0747995
Mean thermo/meso	Arginine; urea cycle, polyamines	0.0573899	-0.0785821
Mean thermo/meso	Tetrapyrroles	0.015502	-0.0807333
Mean thermo/meso	Capsular and extracellular polysacchrides	0.000615222	-0.0910531
Mean thermo/meso	Phospholipids	0.0443071	-0.109632
Mean thermo/meso	DNA replication	0.000952011	-0.131675
Mean thermo/meso	Glutamine, glutamate, aspartate, asparagine; ammonia assimilation	0.0281604	-0.133325
Mean thermo/meso	Heat shock	0.0338478	-0.150622
Mean thermo/meso	Phosphorus Metabolism	8.19019e-06	-0.174844
Mean thermo/meso	Sulfatases and sulfatase modifying factor 1 (and a hypothetical)	0.0264486	-0.180465
Mean thermo/meso	Osmotic stress	0.00829552	-0.188561
Mean thermo/meso	Selenoproteins	0.0300481	-0.210229
Mean thermo/meso	Detoxification	0.0209392	-0.222658
Mean thermo/meso	Polysaccharides	0.00192782	-0.226717
Mean thermo/meso	Putative asociate of RNA polymerase sigma-54 factor rpoN	0.0485959	-0.226922
Mean thermo/meso	Protein folding	0.00254193	-0.235662
Mean thermo/meso	Protein secretion system, Type VI	0.0545099	-0.264502
Mean thermo/meso	Protein processing and modification	3.52273e-05	-0.26979
Mean thermo/meso	Biotin	0.000537617	-0.273497
Mean thermo/meso	Phages, Prophages	0.0372509	-0.331228
Mean thermo/meso	Membrane-bound hydrogenase	0.0263725	-0.368159
Mean thermo/meso	Gram-Positive cell wall components	0.000824679	-0.375911
Mean thermo/meso	DNA recombination	0.0561487	-0.393551
Mean thermo/meso	Nucleotidyl-phosphate metabolic cluster	0.0287393	-0.489015
Mean thermo/meso	Potassium metabolism	2.6866e-06	-0.490073
Mean thermo/meso	Probably Ybbk-related hypothetical membrane proteins	0.0421516	-0.512054
Mean thermo/meso	Ribosome-related cluster	0.0055214	-0.536029
Mean thermo/meso	CRISPRs and associated hypotheticals	0.0327868	-0.625163
Mean thermo/meso	Adhesion	0.0101448	-0.697542
Mean thermo/meso	Hypothetical lipase related to Phosphatidate metabolism	6.19401e-05	-0.95168
Mean thermo/meso	Biosynthesis of phenylpropanoids	0.00277972	-1.169
